# Supplementary material for: Association of pre-pregnancy body mass index with offspring metabolic profile: Analyses of 3 European prospective birth cohorts
Source: PubMed Central journal article supplement (PMC5568725; doi:10.1371/journal.pmed.1002376), 2017-08-22

**S1 Fig.** Overview of the study design, cohorts and statistical analyses. IPD= individual participant data; analysis 1 is our main analysis.

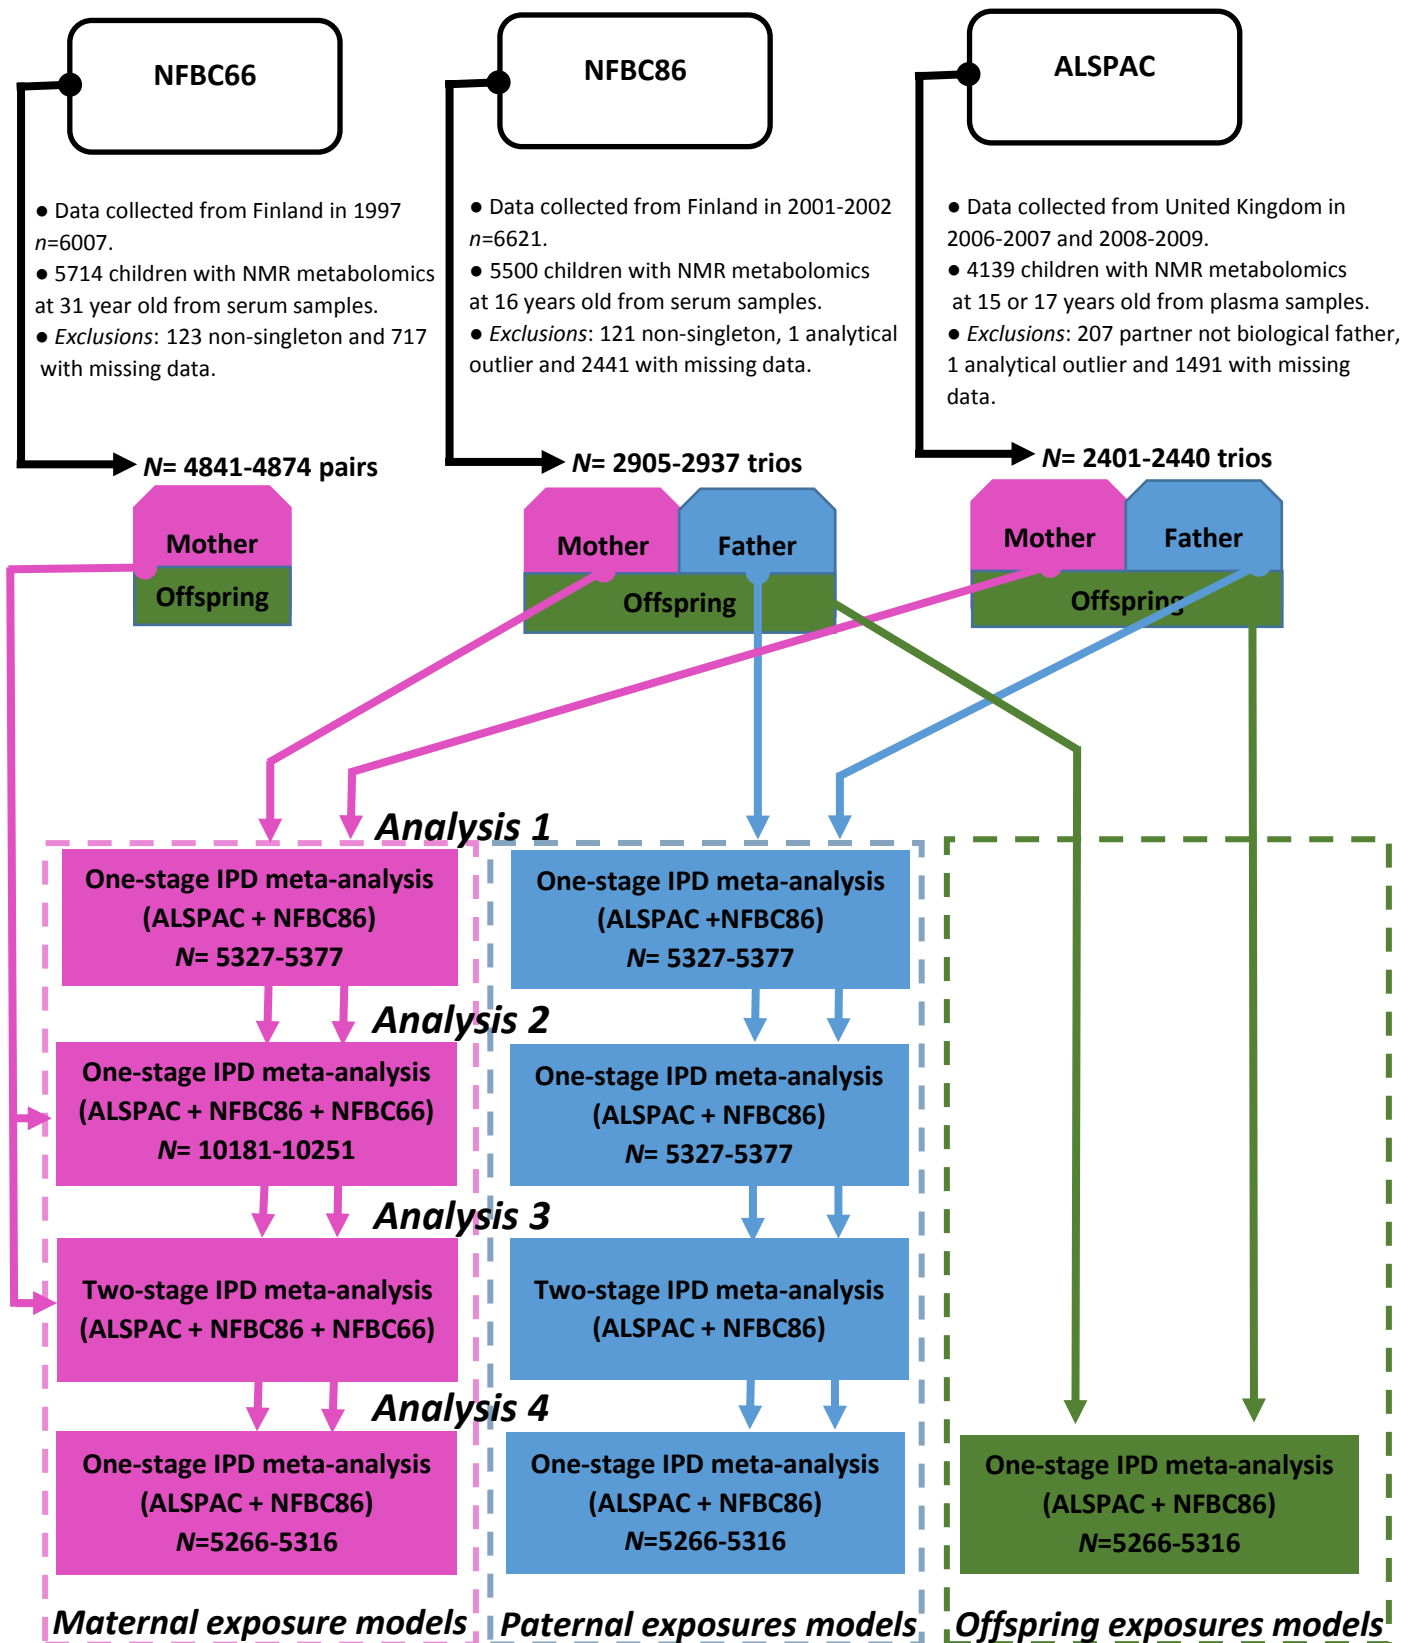

Supplement: pmed.1002376.s001.pdf [file pmed.1002376.s001.pdf]
