# Supplementary material for: Association of pre-pregnancy body mass index with offspring metabolic profile: Analyses of 3 European prospective birth cohorts
Source: PubMed Central journal article supplement (PMC5568725; doi:10.1371/journal.pmed.1002376), 2017-08-22
Supplement: pmed.1002376.s003.pdf [file pmed.1002376.s003.pdf]

**S3 Fig.** Two-stage IPD meta-analysis and individual cohort associations: offspring lipoprotein, lipids and metabolite differences per 1-SD higher maternal (pink) or paternal (blue) BMI.

**Lipoprotein subclasses**  
Extremely large VLDL

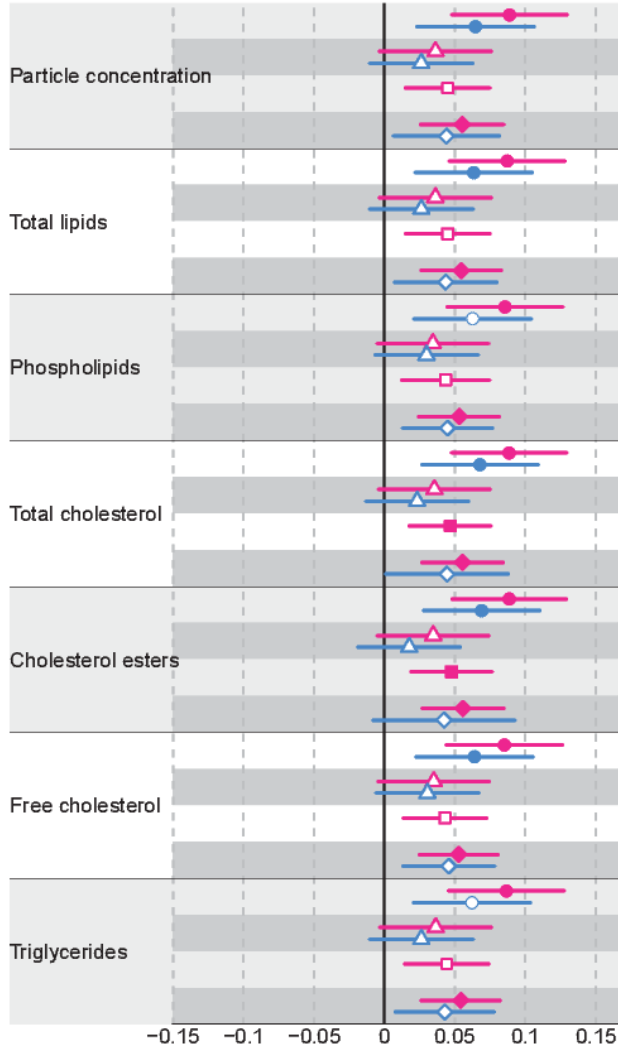

Very large VLDL

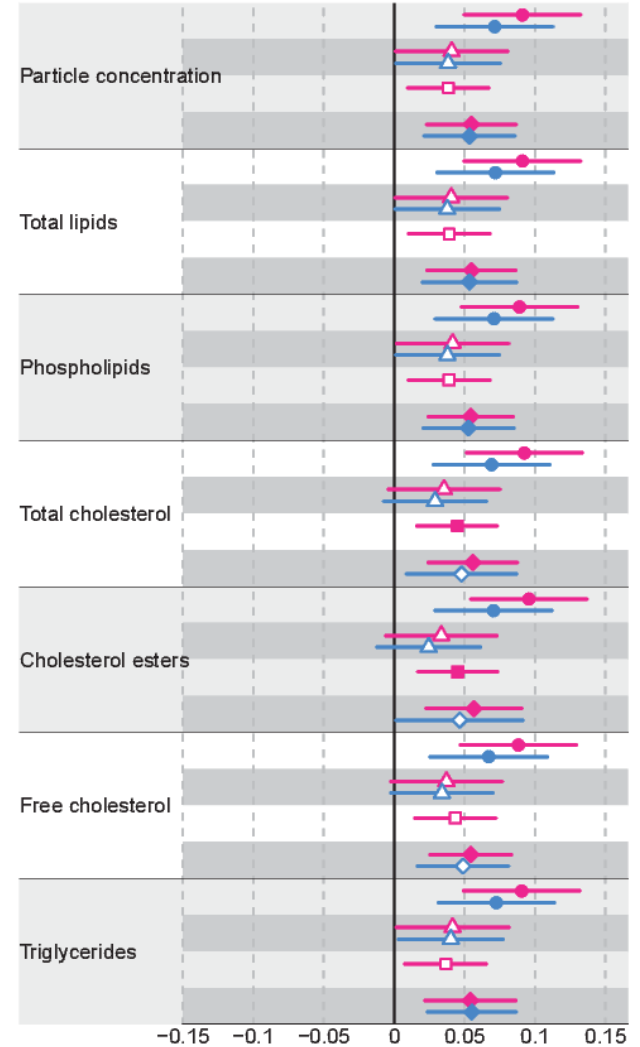

SD difference in offspring metabolite concentration (95%CI) per 1-SD of parental BMI increment

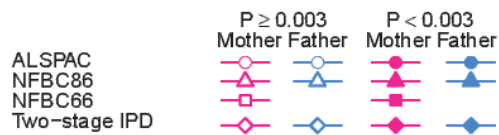

\*  $P < 0.003$  for parental difference

S3 Fig continued.

Lipoprotein subclasses

Large VLDL

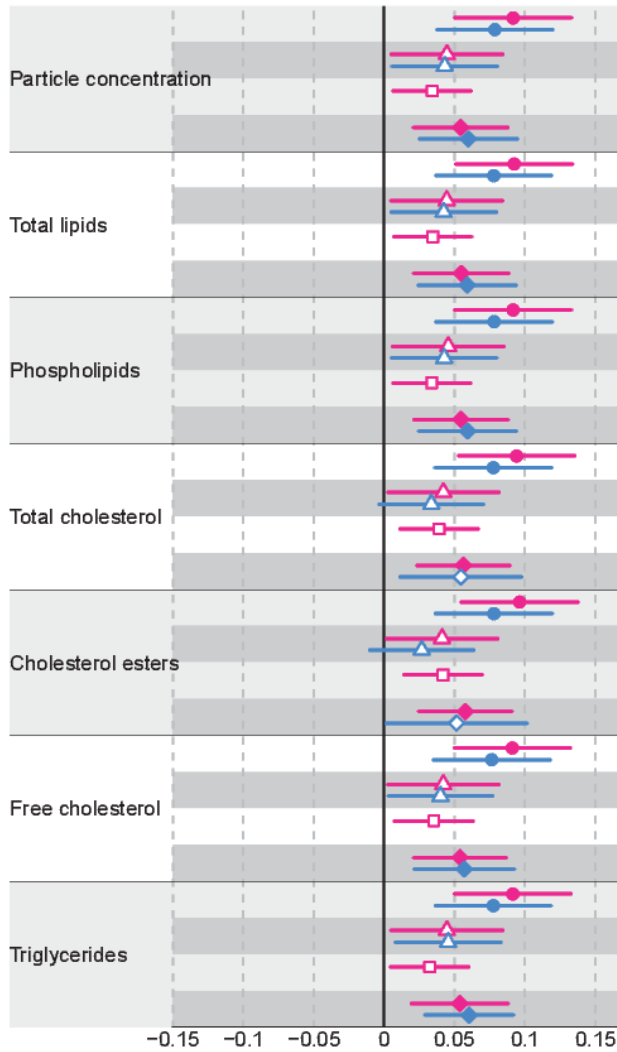

Medium VLDL

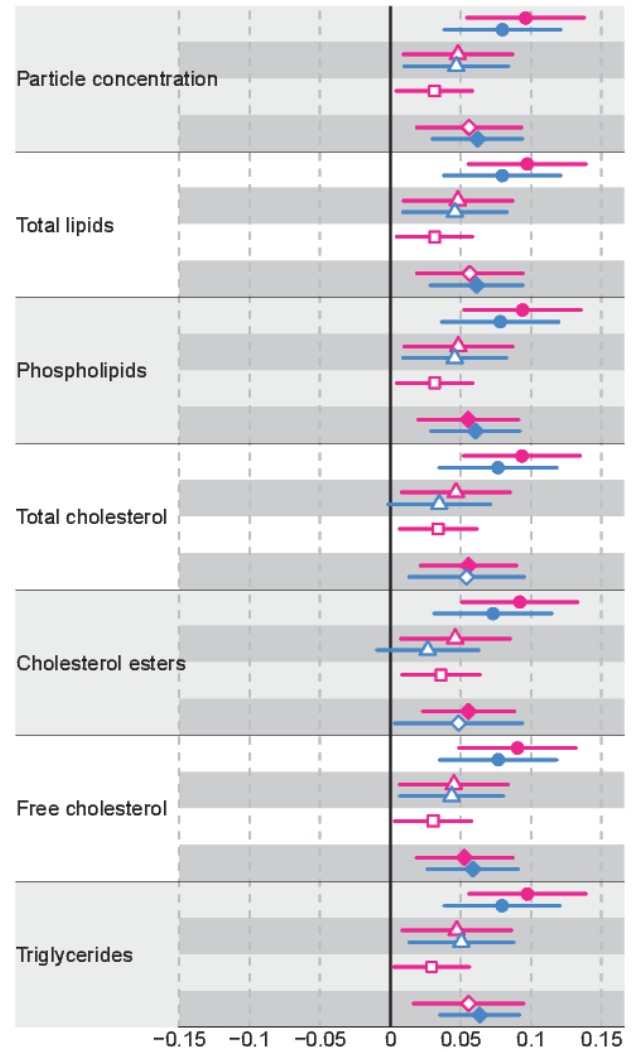

SD difference in offspring metabolite concentration (95%CI) per 1-SD of parental BMI increment

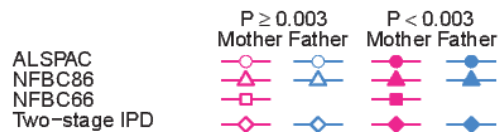

\* P < 0.003 for parental difference

S3 Fig continued.

Lipoprotein subclasses

Small VLDL

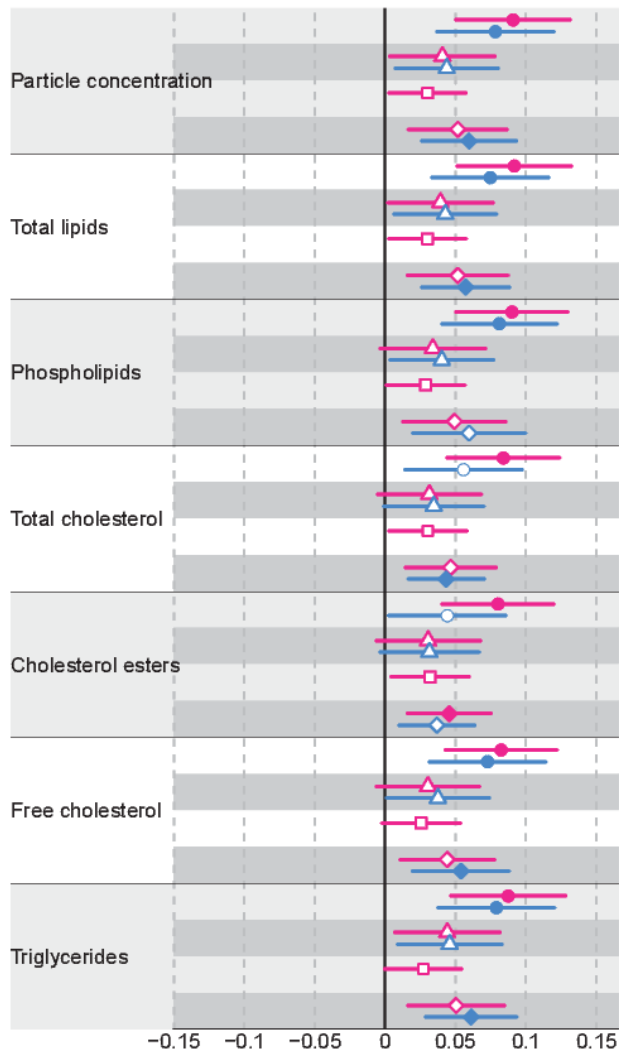

Very Small VLDL

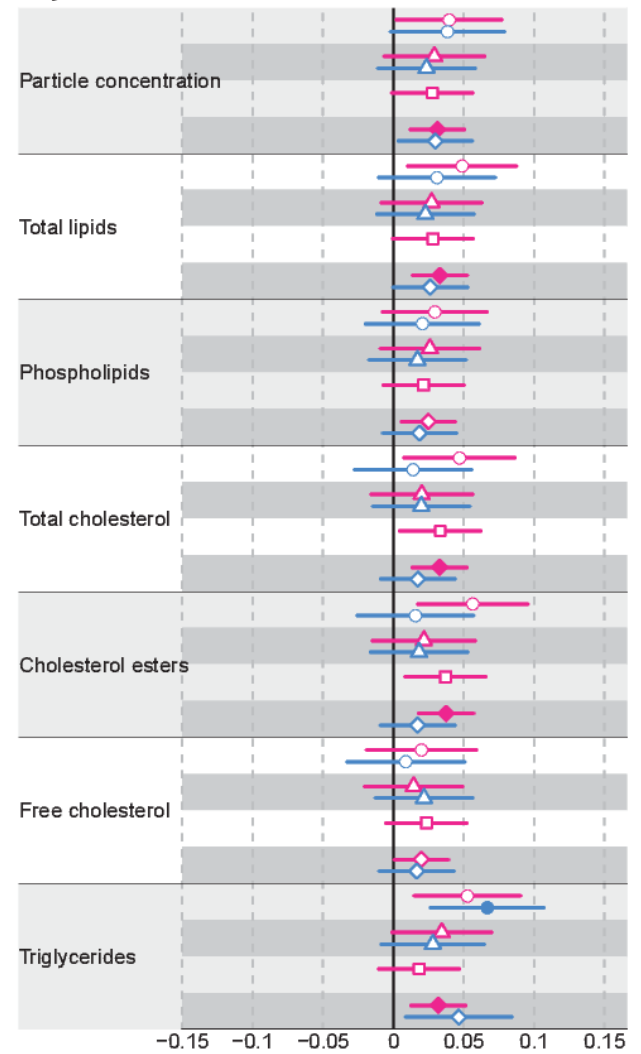

SD difference in offspring metabolite concentration (95%CI) per 1-SD of parental BMI increment

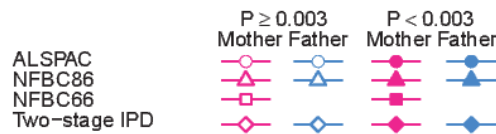

\* P < 0.003 for parental difference

S3 Fig continued.

Lipoprotein subclasses

IDL

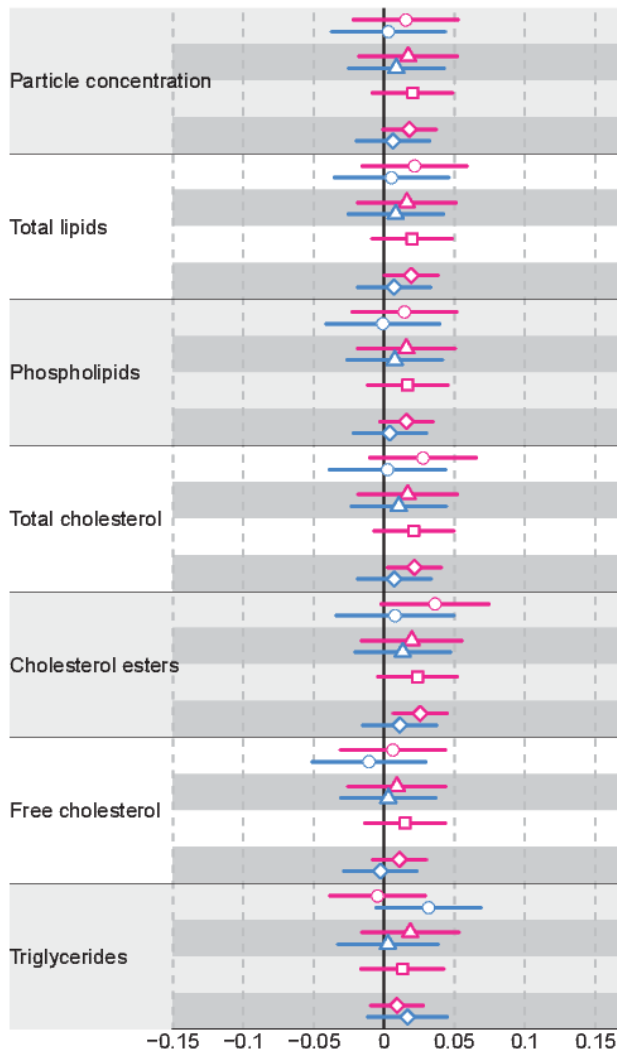

Large LDL

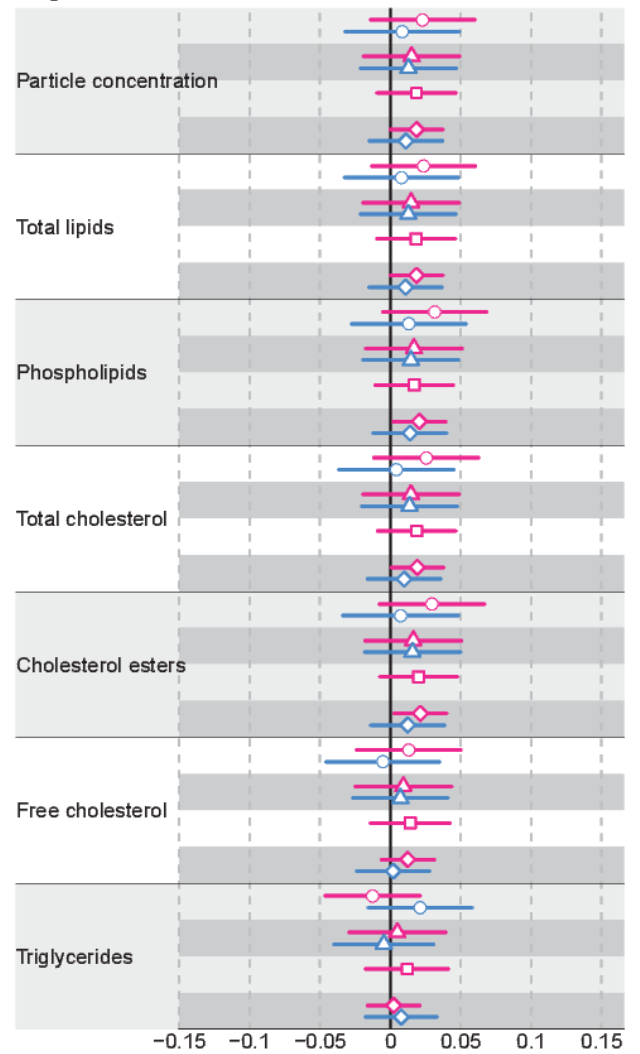

SD difference in offspring metabolite concentration (95%CI) per 1-SD of parental BMI increment

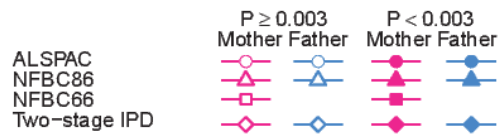

\* P < 0.003 for parental difference

S3 Fig continued.

Lipoprotein subclasses

Medium LDL

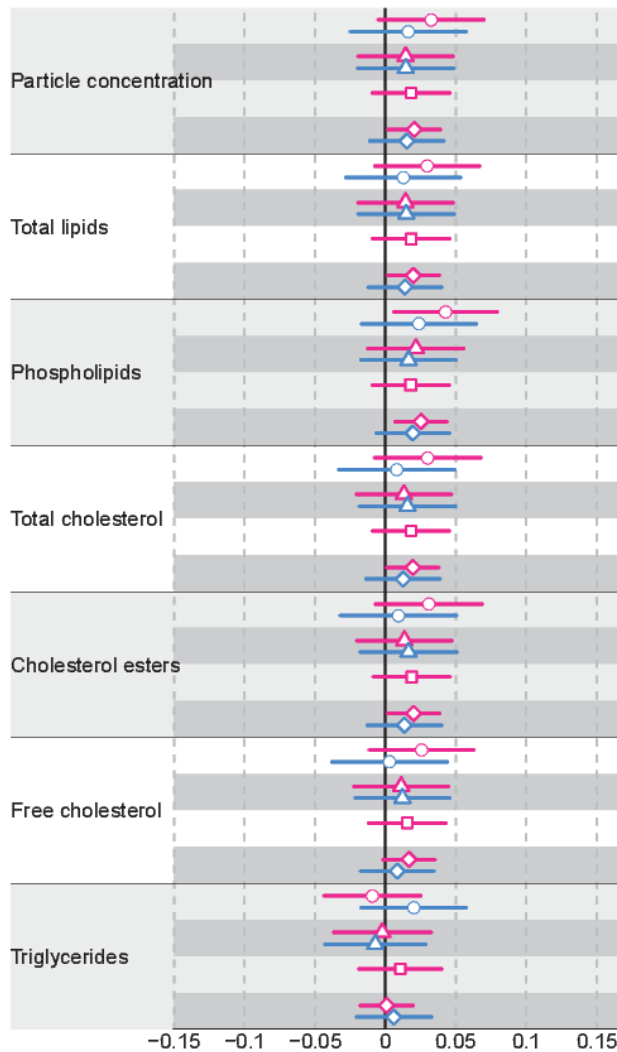

Small LDL

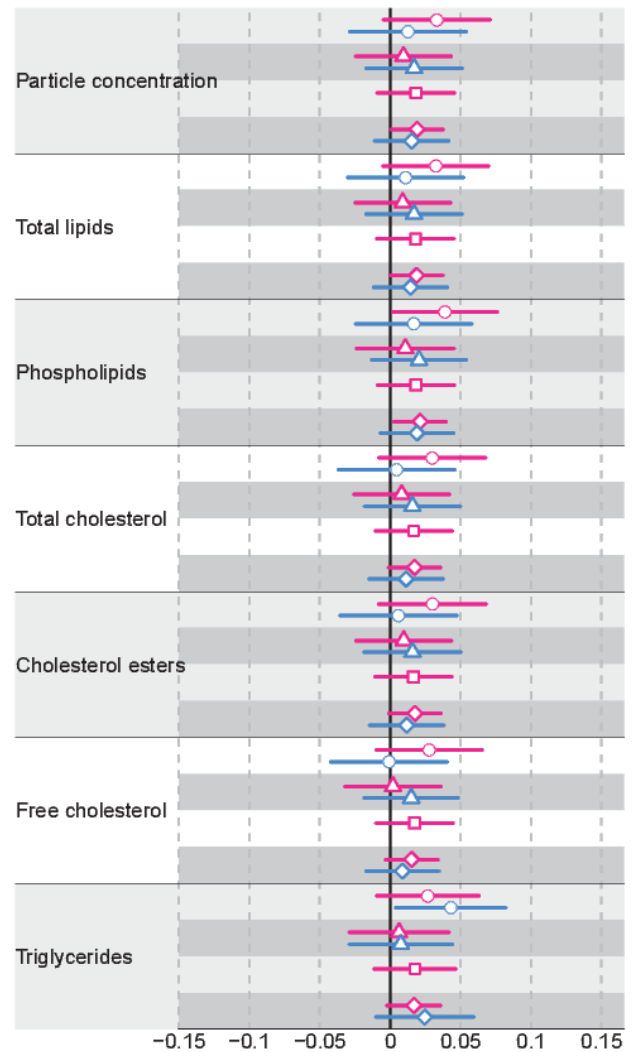

SD difference in offspring metabolite concentration (95%CI) per 1-SD of parental BMI increment

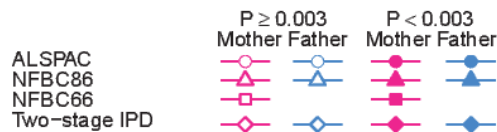

\* P < 0.003 for parental difference

S3 Fig continued.

Lipoprotein subclasses

Very large HDL

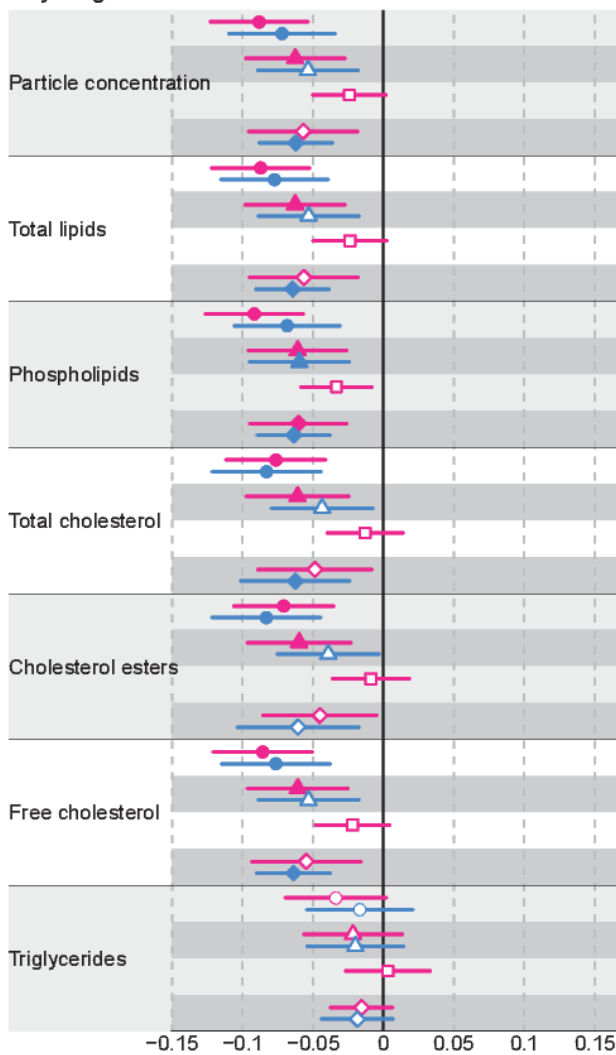

Large HDL

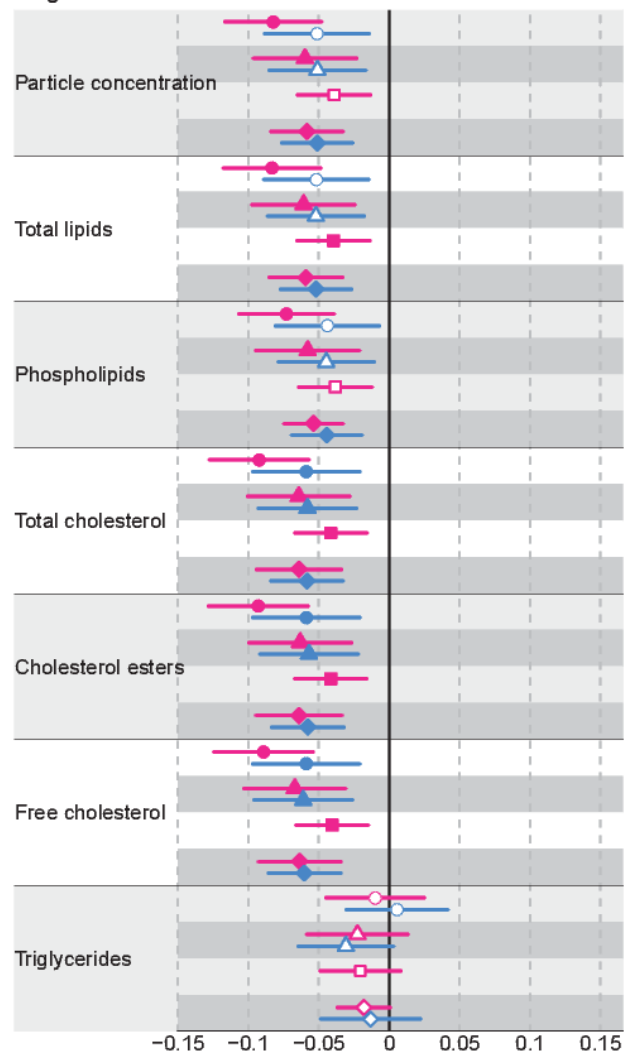

SD difference in offspring metabolite concentration (95%CI) per 1-SD of parental BMI increment

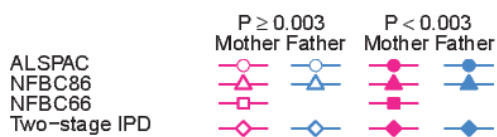

\* P < 0.003 for parental difference

S3 Fig continued.

Lipoprotein subclasses

Medium HDL

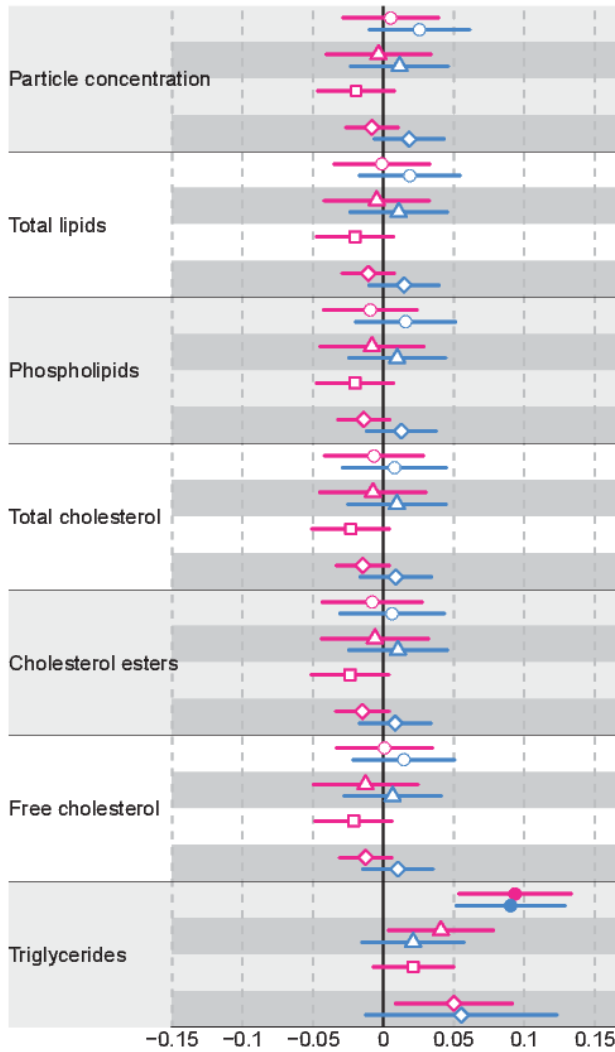

Small HDL

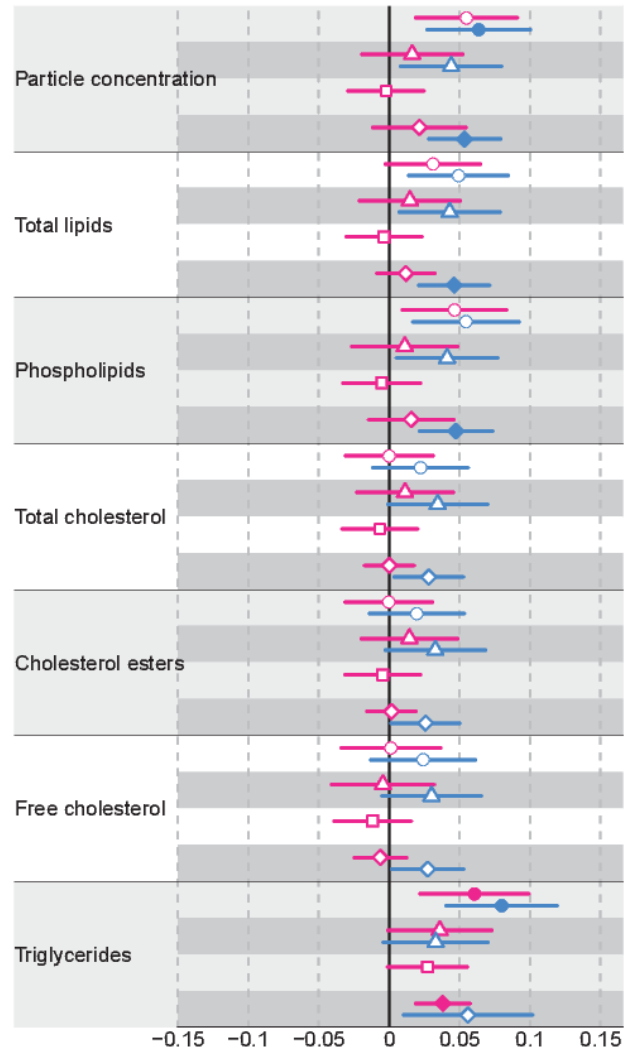

SD difference in offspring metabolite concentration (95%CI) per 1-SD of parental BMI increment



\*  $P < 0.003$  for parental difference

S3 Fig continued.

**Cholesterol**

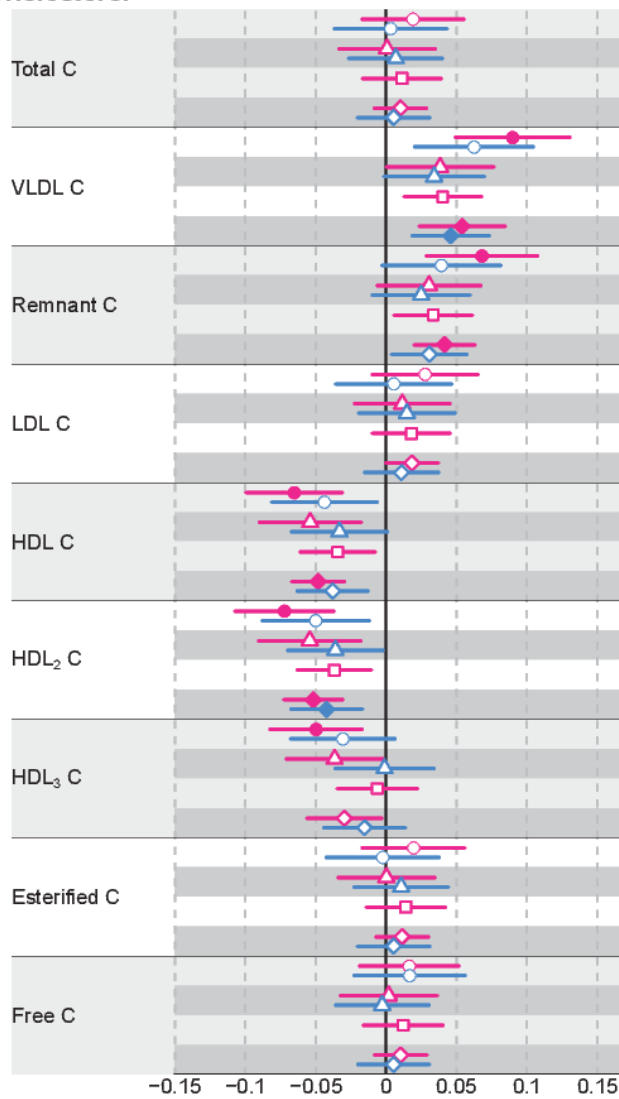

**Glycerides and phospholipids**

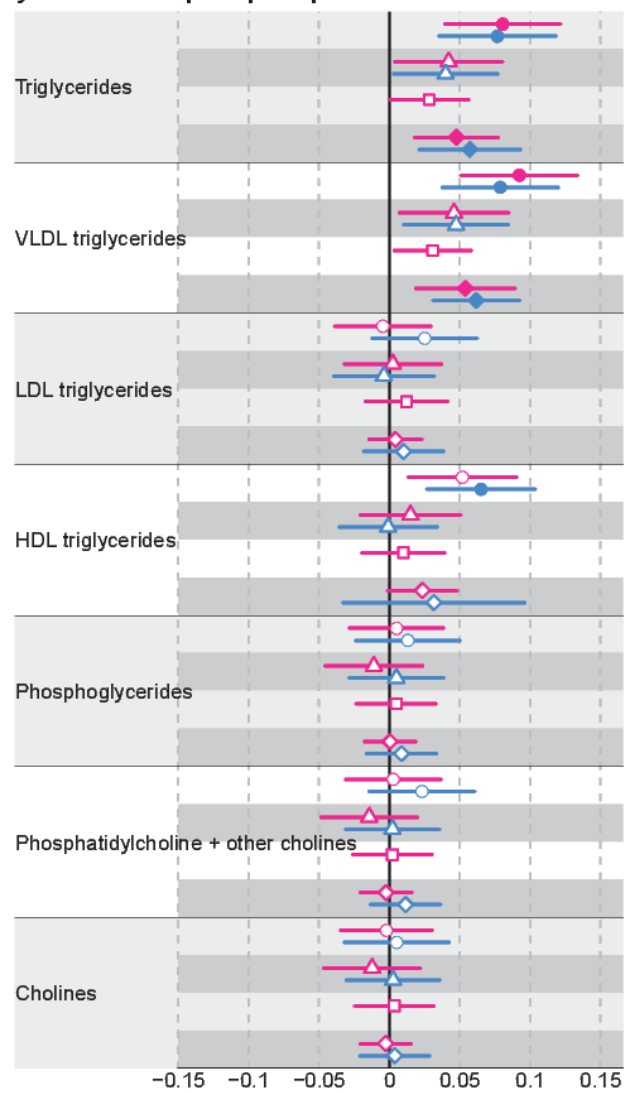

SD difference in offspring metabolite concentration (95%CI) per 1-SD of parental BMI increment

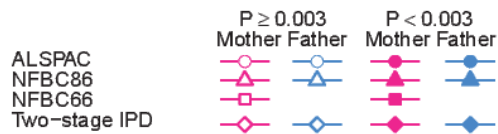

\* P < 0.003 for parental difference



S3 Fig continued.

**Fatty acids**

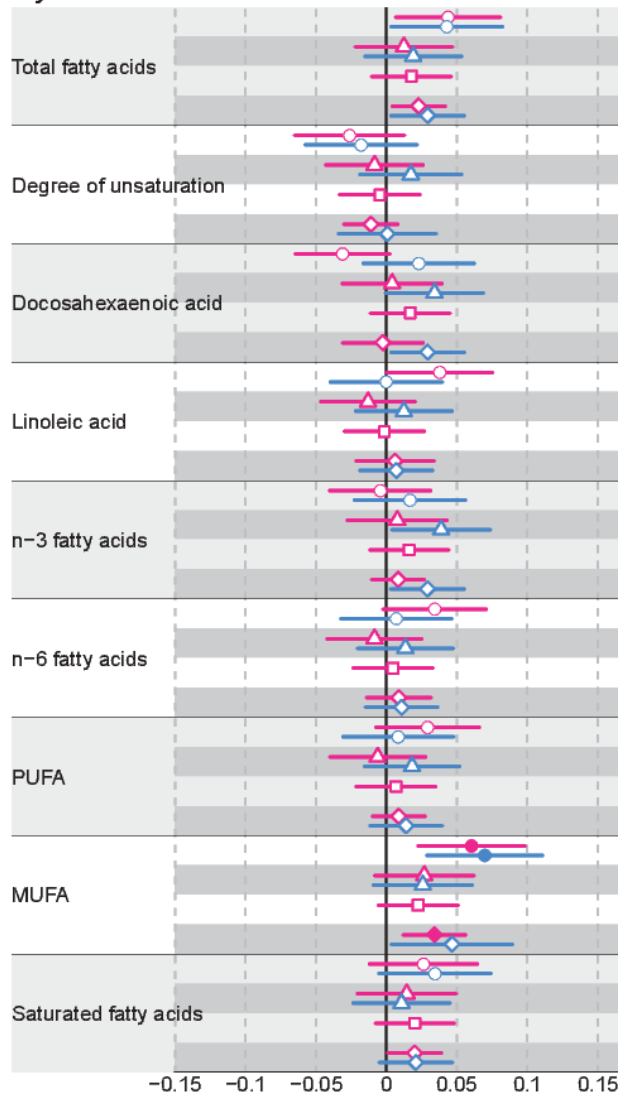

**Fatty acids ratios**

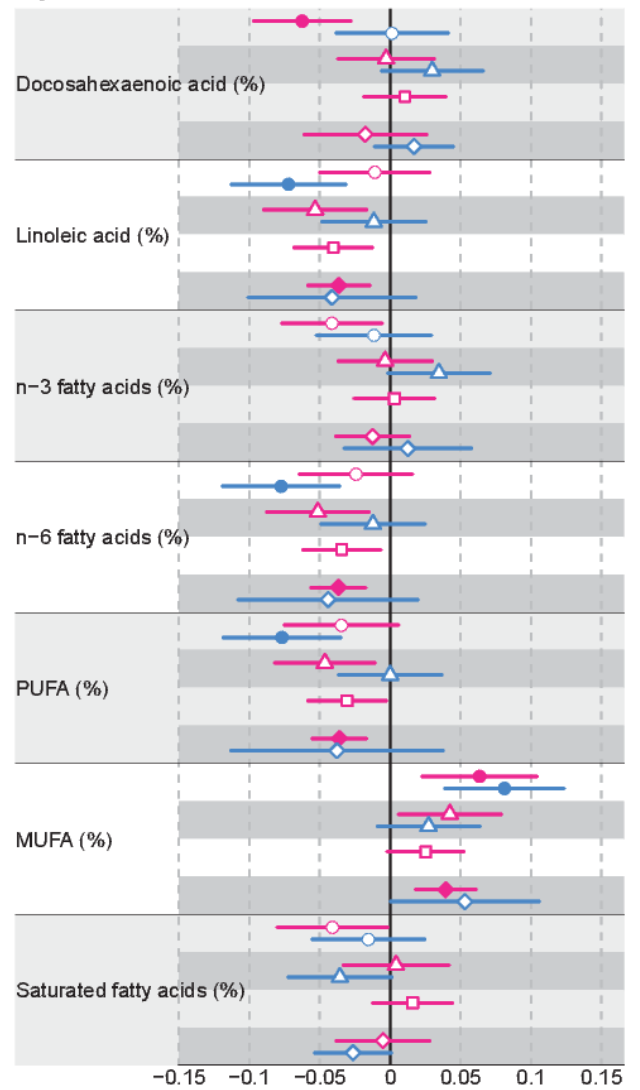

SD difference in offspring metabolite concentration (95%CI) per 1-SD of parental BMI increment

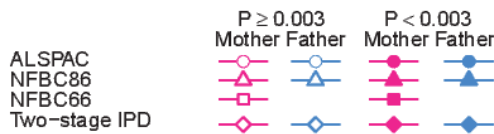

\*  $P < 0.003$  for parental difference

S3 Fig continued.

**Lipoprotein particle size**

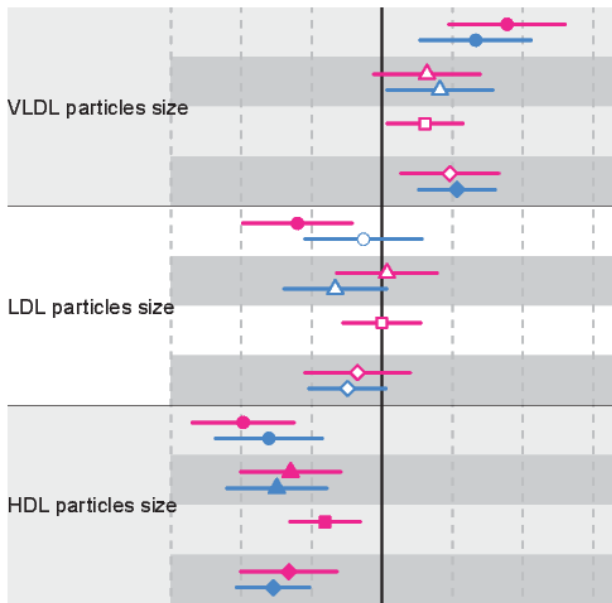

**Glycolysis related metabolites**

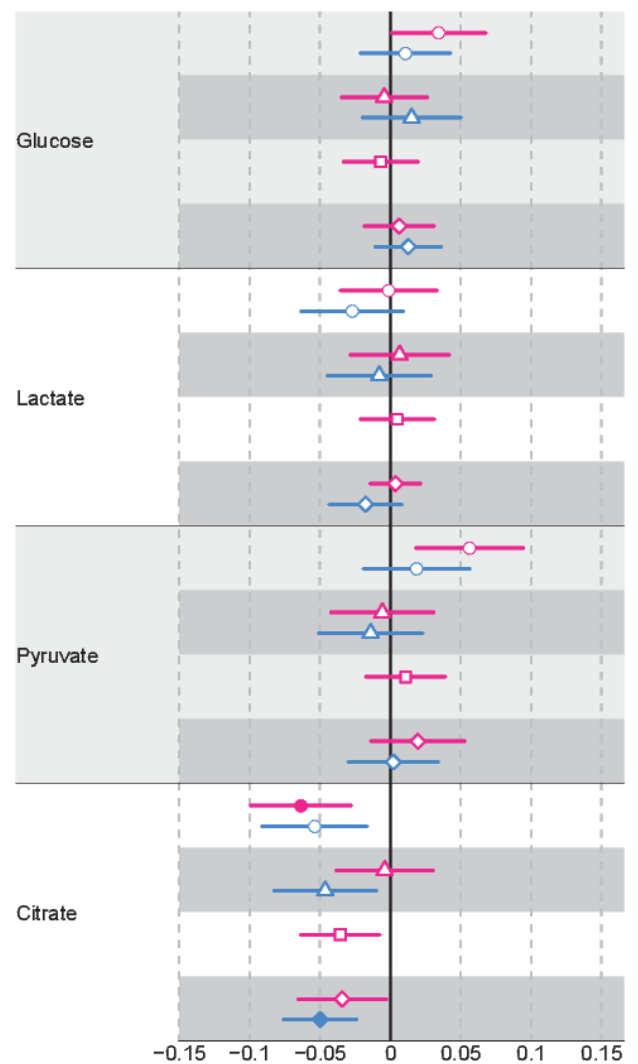

**Apolipoproteins**

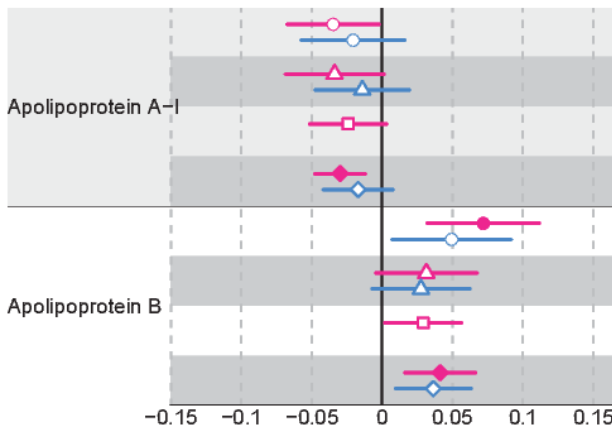

SD difference in offspring metabolite concentration (95%CI) per 1-SD of parental BMI increment

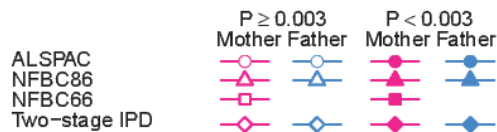

\* P < 0.003 for parental difference

S3 Fig continued.

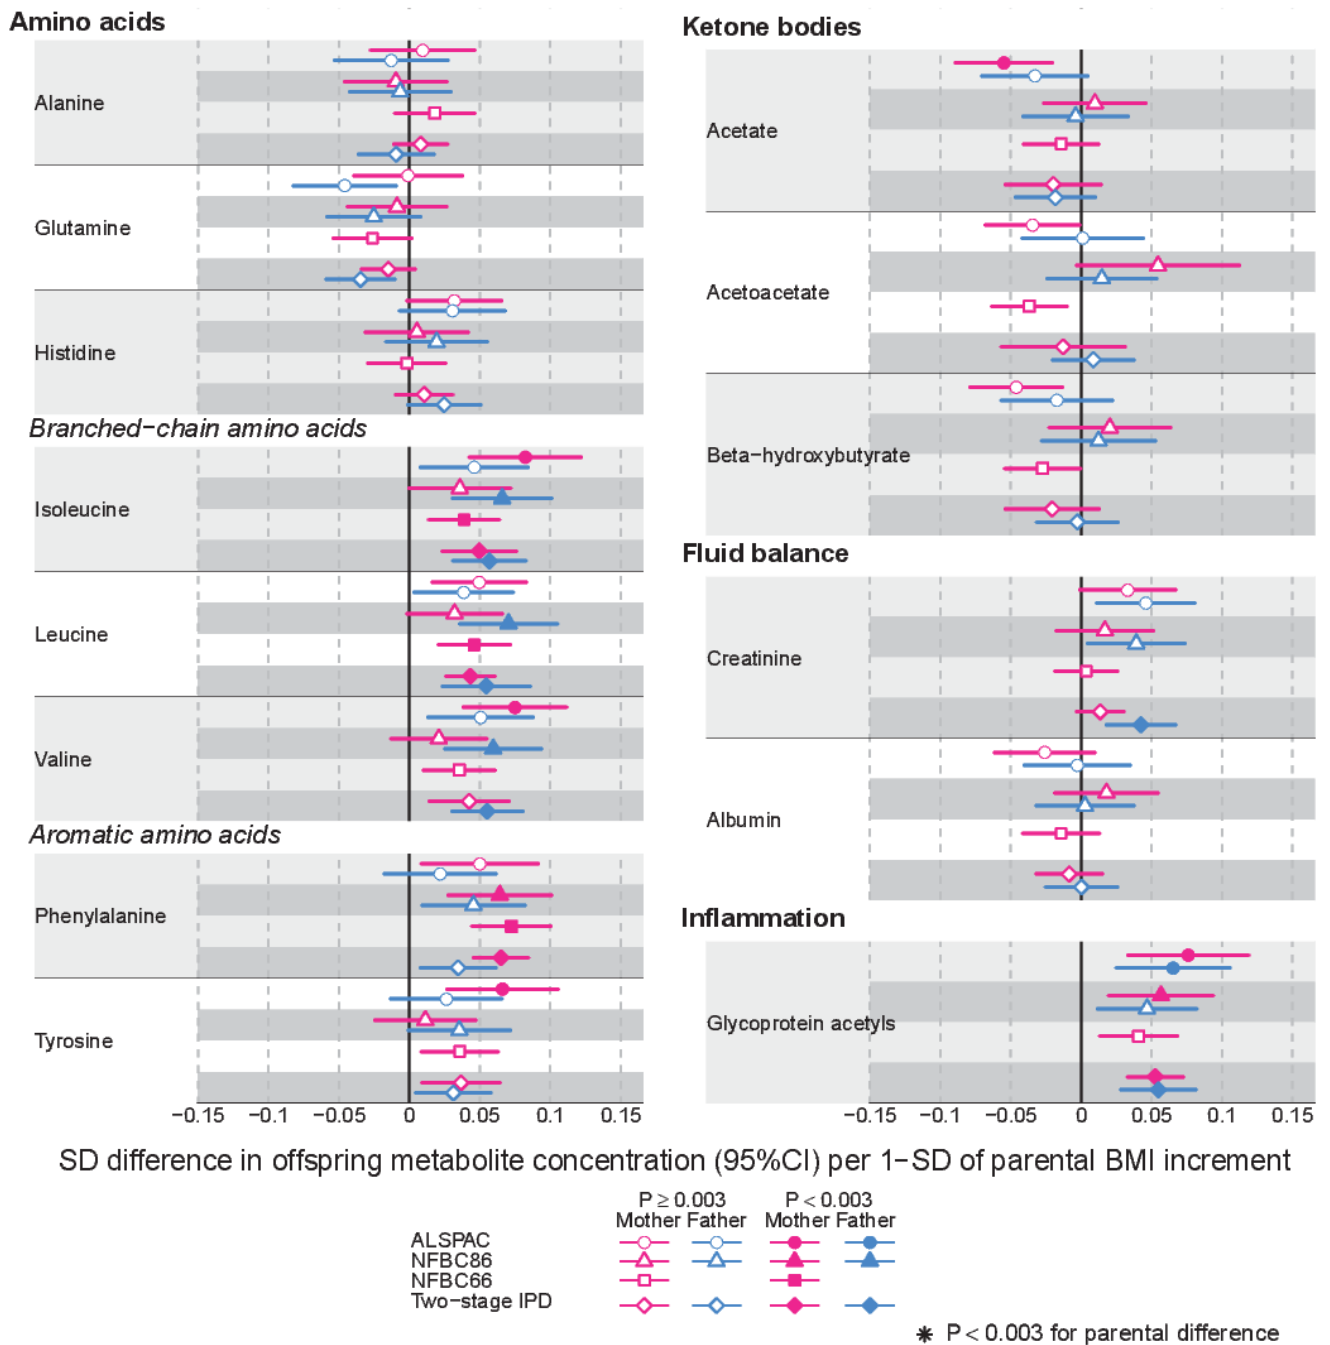

Associations were adjusted for parental age, smoking status, education, head of household social class, maternal parity, offspring's age at blood collection and sex. Results are shown in SD-scaled concentration units of outcome, changes in absolute concentration units are listed in S4-S6 Tables. Error bars= 95% confidence intervals (CI). VLDL=very-low-density lipoprotein; IDL=intermediate-density lipoprotein; LDL=low-density lipoprotein; HDL=high-density lipoprotein; C= cholesterol; MUFA=monounsaturated fatty acids; PUFA=polyunsaturated fatty acids.
