# Supplementary material for: Association of pre-pregnancy body mass index with offspring metabolic profile: Analyses of 3 European prospective birth cohorts
Source: PubMed Central journal article supplement (PMC5568725; doi:10.1371/journal.pmed.1002376), 2017-08-22
Supplement: pmed.1002376.s004.pdf [file pmed.1002376.s004.pdf]

**S4 Fig.** One-stage IPD meta-analysis: offspring lipoprotein, lipids and metabolite differences in means in SD units per 1-SD higher maternal (pink) or paternal (blue) BMI, meta-analysed across ALSPAC, NFBC86 and NFBC66 cohorts.

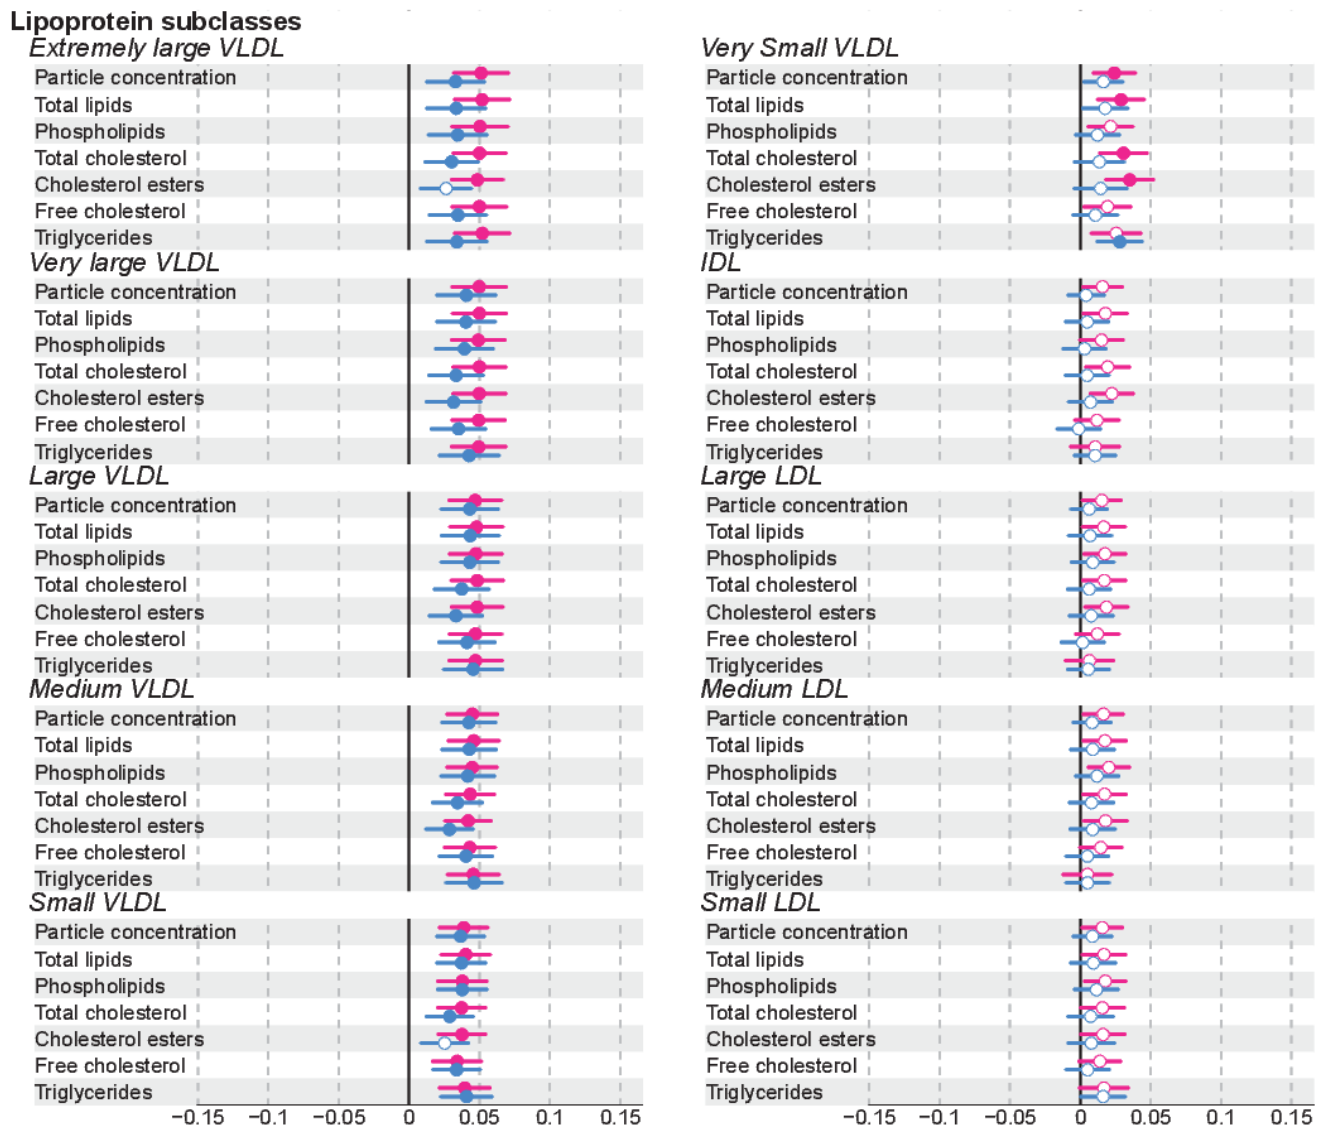

SD difference in offspring metabolite concentration (95%CI) per 1-SD of parental BMI increment

P ≥ 0.003 P < 0.003  
Mother Father Mother Father  
One-stage IPD ○ ○ ● ●

\* P < 0.0035 for parental difference

S4 Fig continued.

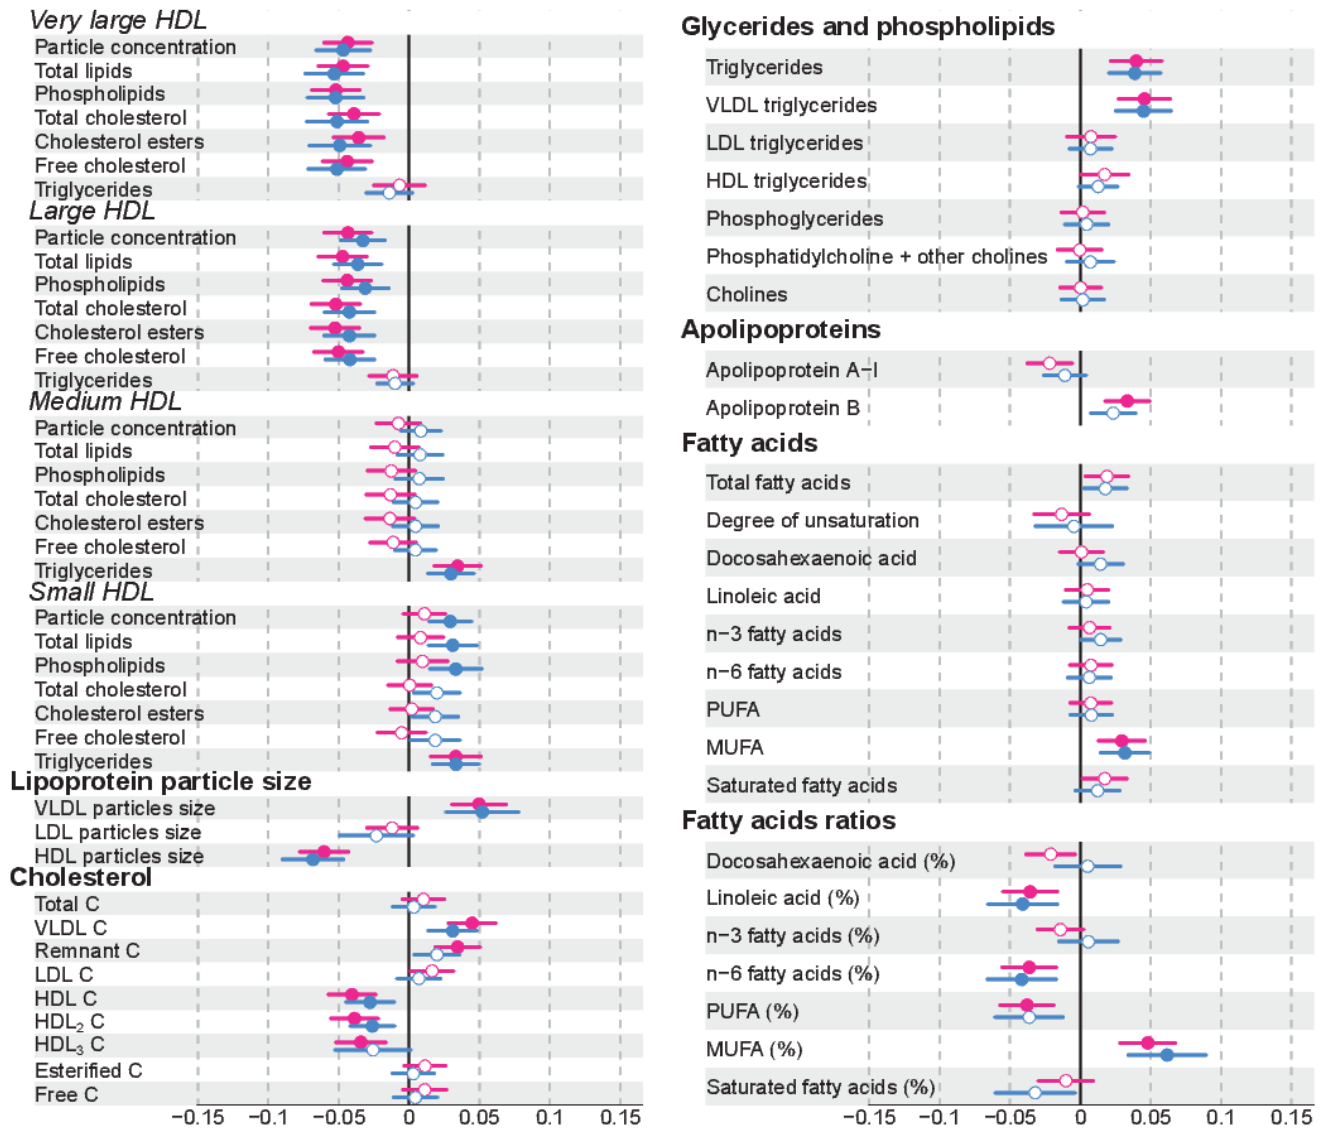

SD difference in offspring metabolite concentration (95%CI) per 1-SD of parental BMI increment

$P \geq 0.003$        $P < 0.003$   
 Mother Father    Mother Father  
 One-stage IPD    ○    ●    ○    ●

\*  $P < 0.0035$  for parental difference

S4 Fig continued.

**Glycolysis related metabolites**

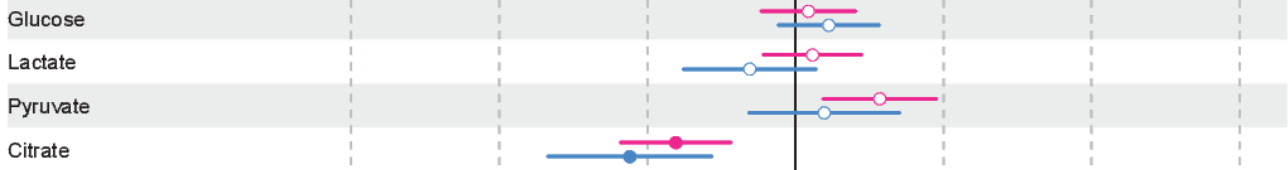

**Amino acids**

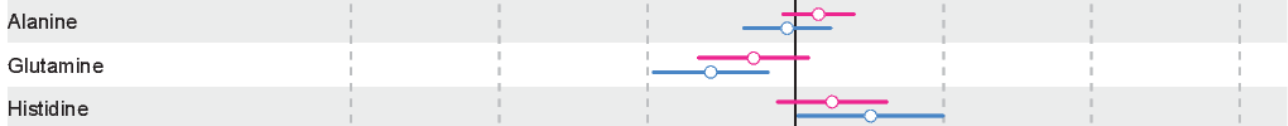

**Branched-chain amino acids**

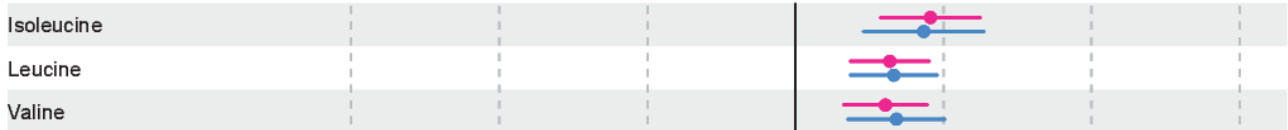

**Aromatic amino acids**

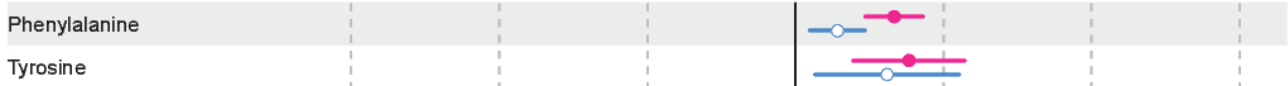

**Ketone bodies**

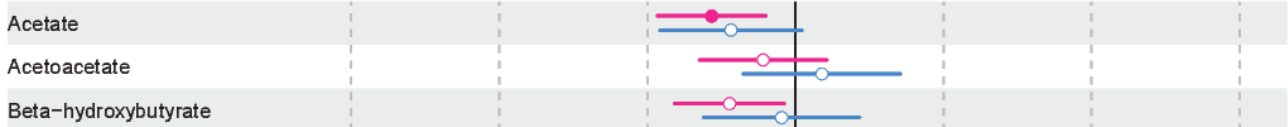

**Fluid balance**

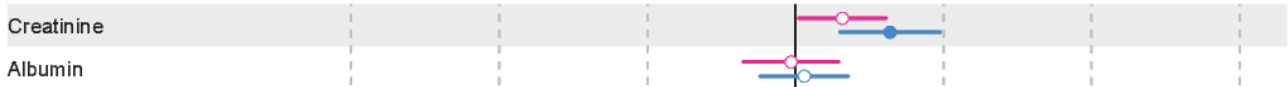

**Inflammation**

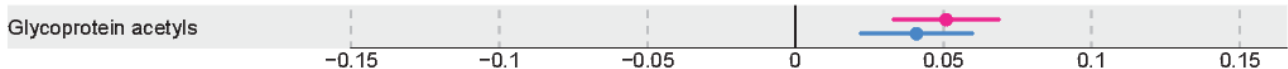

SD difference in offspring metabolite concentration (95%CI) per 1-SD of parental BMI increment

P ≥ 0.003
P < 0.003  
Mother
Father  
One-stage IPD
○
○
●
●

\* P < 0.0035 for parental difference

Associations were adjusted for parental age, smoking, education, head of household social class, maternal parity, offspring's age at blood collection, sex and cohort membership. Error bars= 95% confidence intervals (CI). VLDL=very-low-density lipoprotein; IDL=intermediate-density lipoprotein; LDL=low-density lipoprotein; HDL=high-density lipoprotein; C= cholesterol; MUFA=monounsaturated fatty acids; PUFA=polyunsaturated fatty acids.
