# Supplementary material for: Association of pre-pregnancy body mass index with offspring metabolic profile: Analyses of 3 European prospective birth cohorts
Source: PubMed Central journal article supplement (PMC5568725; doi:10.1371/journal.pmed.1002376), 2017-08-22
Supplement: pmed.1002376.s007.pdf [file pmed.1002376.s007.pdf]

**S7 Fig.** One-stage IPD meta-analysis: offspring lipoprotein, lipids and metabolite differences in means in SD units per 1-SD higher maternal (pink) or paternal (blue) BMI, meta-analysed across ALSPAC and NFBC86 cohorts, with and without further adjustment for offspring BMI.

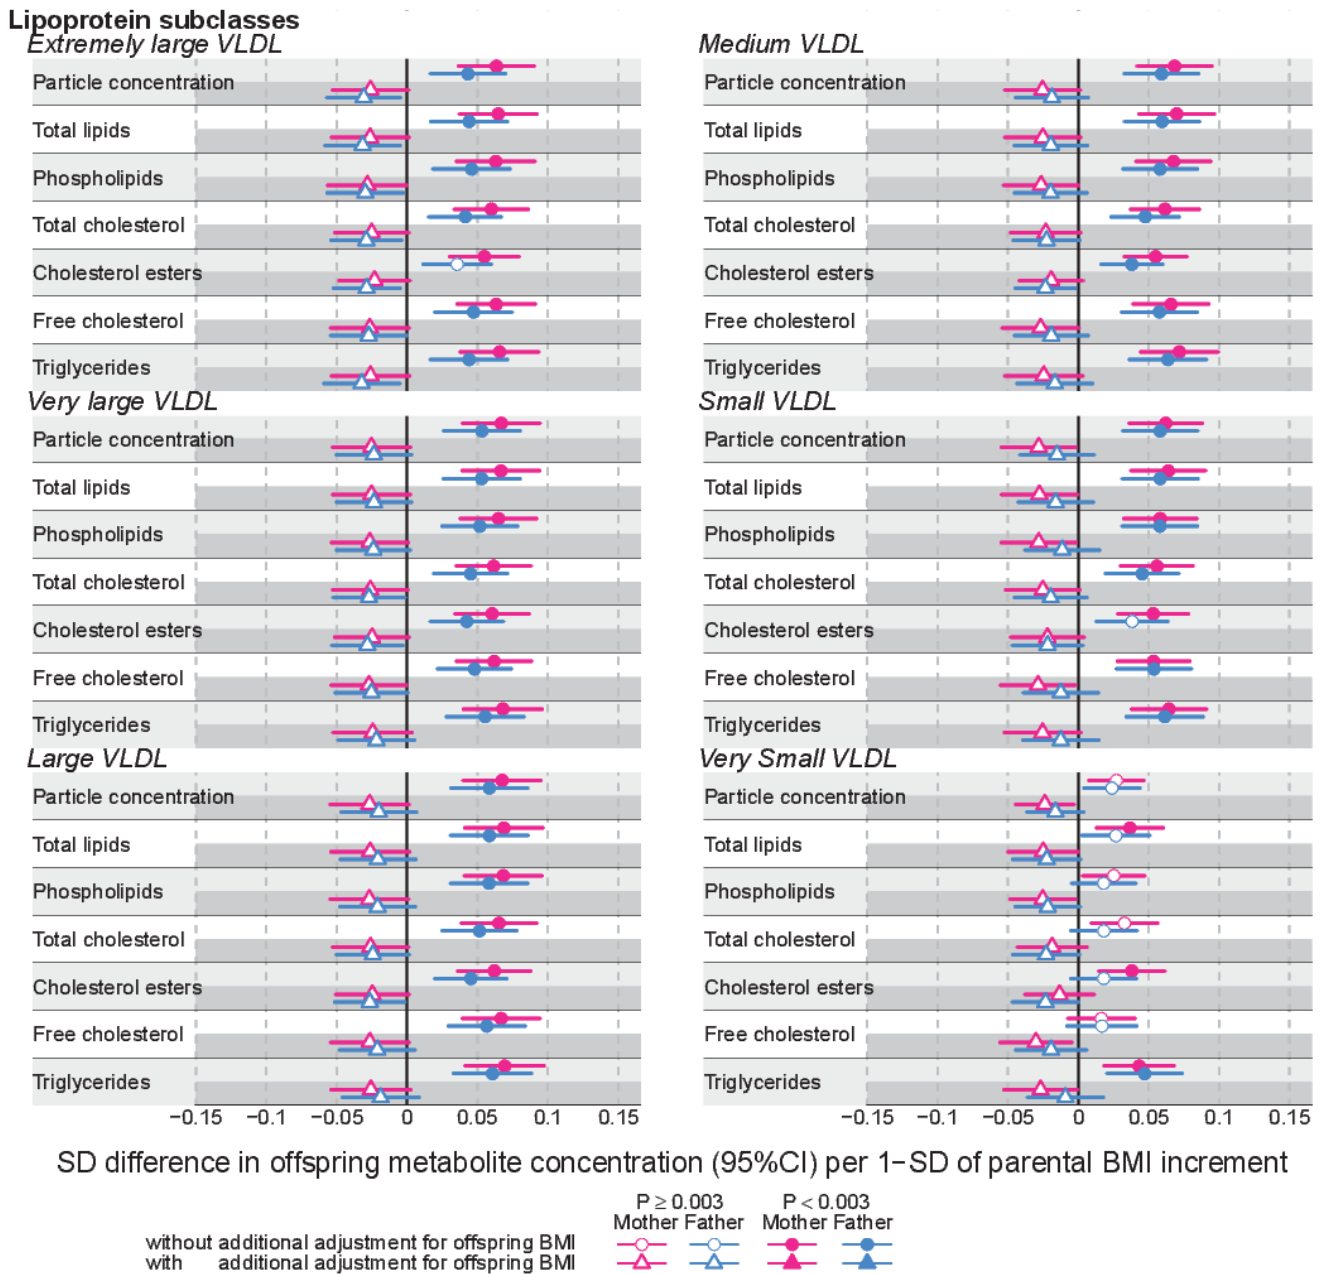

\* P < 0.0037 for parental difference

S7 Fig continued.

**Lipoprotein subclasses**

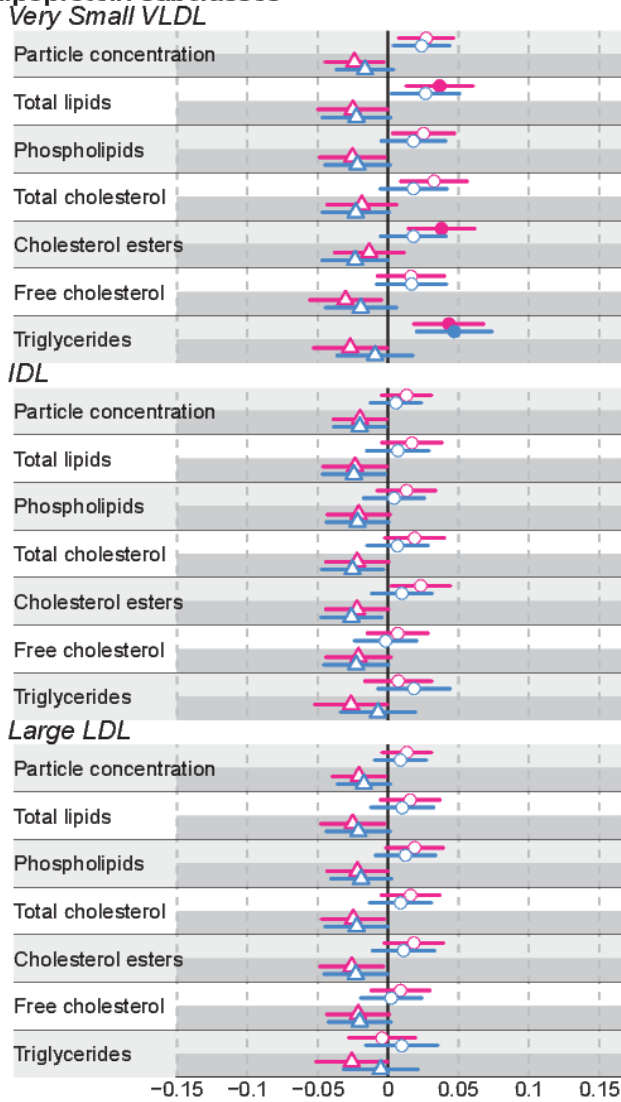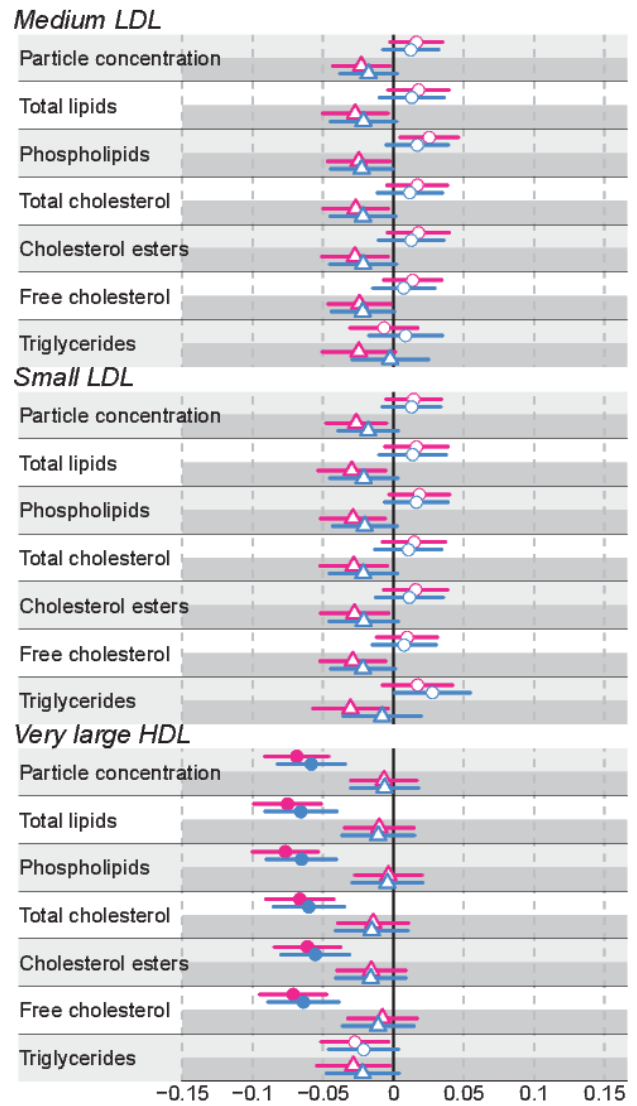

SD difference in offspring metabolite concentration (95%CI) per 1-SD of parental BMI increment

|                                                 |                                              |           |           |
|-------------------------------------------------|----------------------------------------------|-----------|-----------|
|                                                 |                                              | P ≥ 0.003 | P < 0.003 |
|                                                 |                                              | Mother    | Father    |
| without additional adjustment for offspring BMI | with additional adjustment for offspring BMI | ○         | ●         |
|                                                 |                                              | △         | ▲         |

\* P < 0.0037 for parental difference

S7 Fig continued.

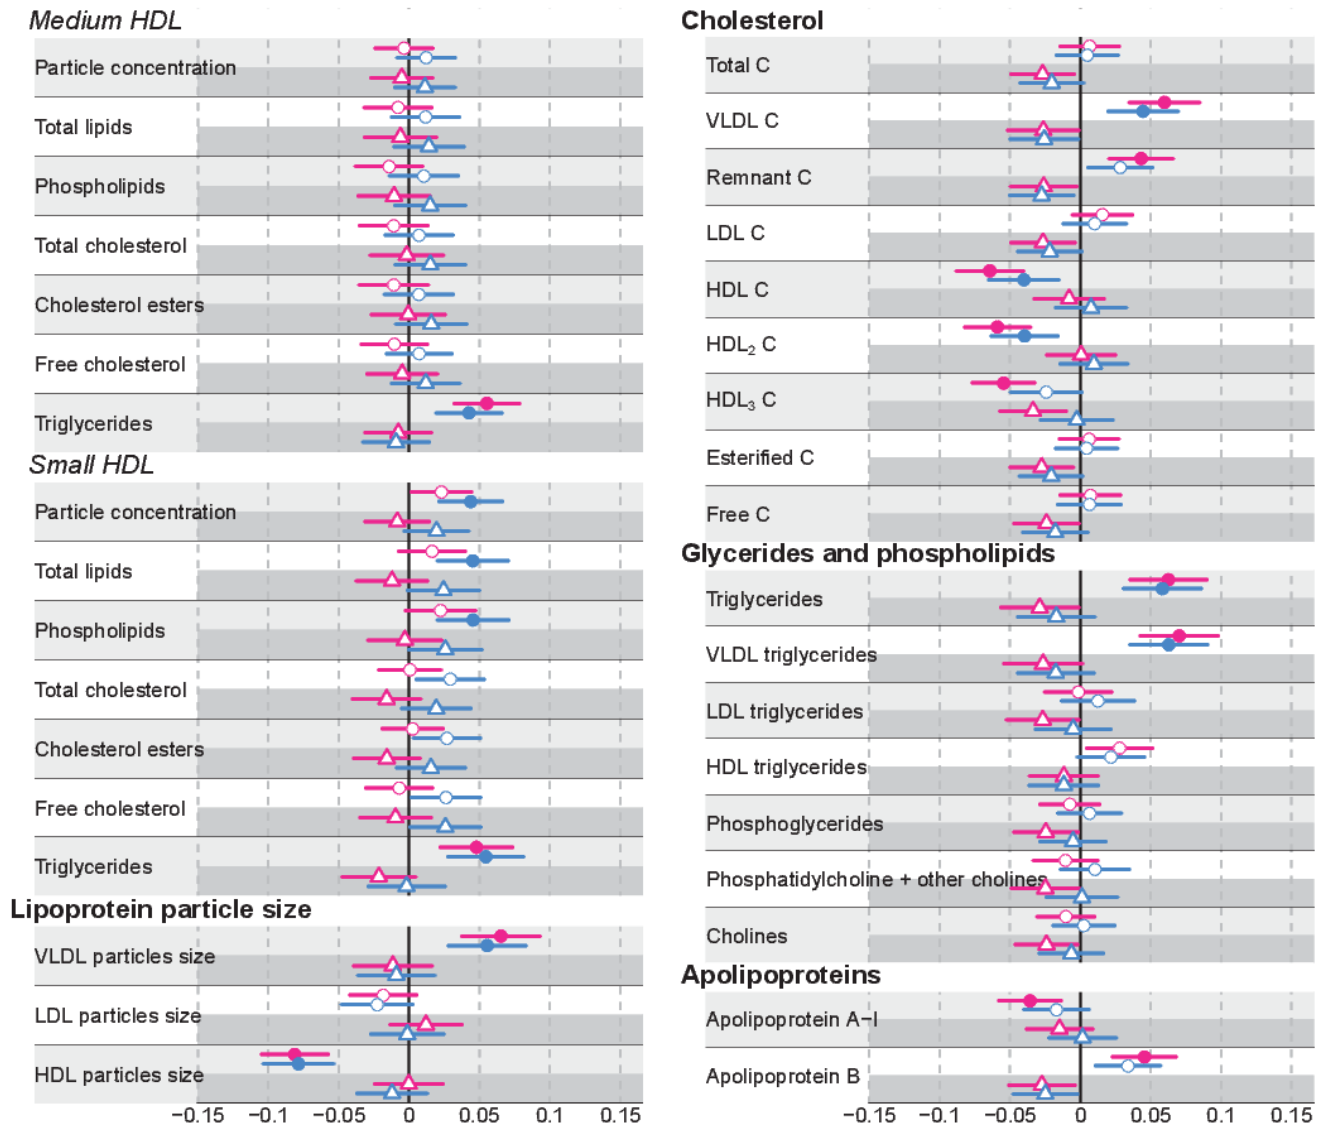

SD difference in offspring metabolite concentration (95%CI) per 1-SD of parental BMI increment

without additional adjustment for offspring BMI      P ≥ 0.003      P < 0.003  
 with additional adjustment for offspring BMI      Mother Father      Mother Father

\* P < 0.0037 for parental difference

S7 Fig continued.

**Fatty acids**

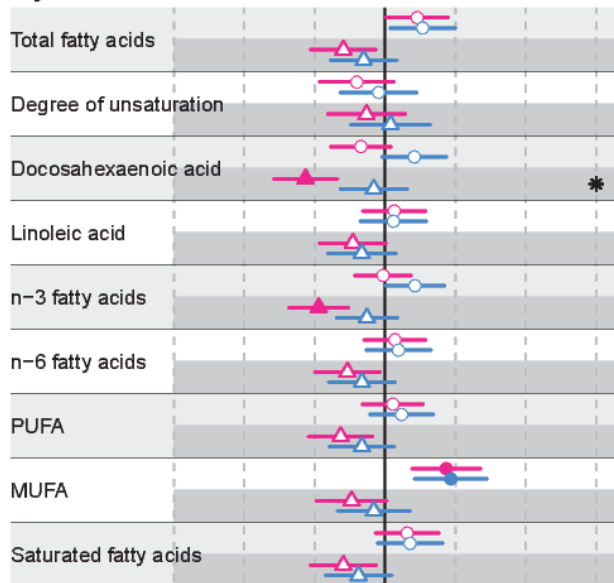

**Fatty acids ratios**

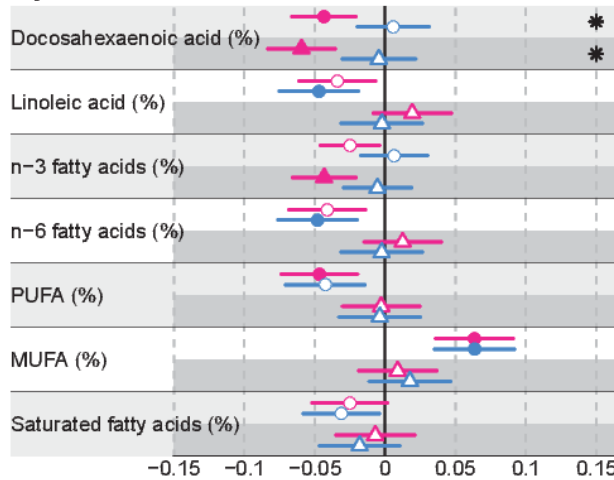

**Glycolysis related metabolites**

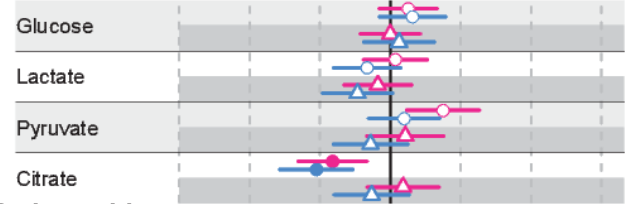

**Amino acids**

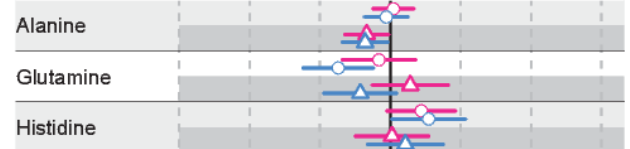

**Branched-chain amino acids**

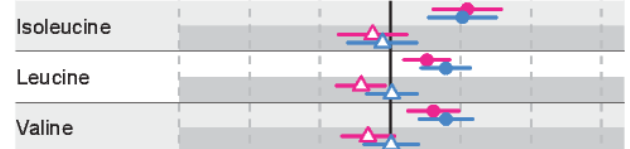

**Aromatic amino acids**

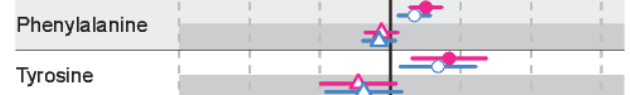

**Ketone bodies**

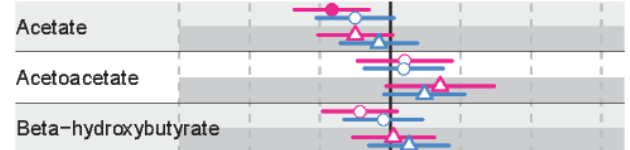

**Fluid balance**

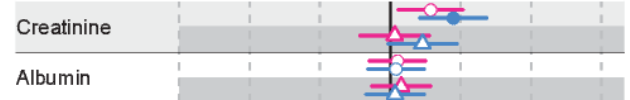

**Inflammation**

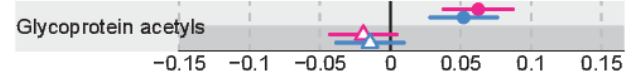

SD difference in offspring metabolite concentration (95%CI) per 1-SD of parental BMI increment

without additional adjustment for offspring BMI      P ≥ 0.003      P < 0.003  
 with additional adjustment for offspring BMI      Mother Father      Mother Father

\* P < 0.0037 for parental difference

Associations were adjusted for parental age, smoking status, education, head of household social class, maternal parity, offspring's age at blood collection, sex and cohorts membership. Results are shown in SD-scaled concentration units of outcome and error bars denote 95% CI. VLDL=very-low-density lipoprotein; IDL=intermediate-density lipoprotein; LDL=low-density lipoprotein; HDL= high-density lipoprotein; C= cholesterol; MUFA=monounsaturated fatty acids; PUFA=polyunsaturated fatty acids.
