# Supplementary material for: Association of pre-pregnancy body mass index with offspring metabolic profile: Analyses of 3 European prospective birth cohorts
Source: PubMed Central journal article supplement (PMC5568725; doi:10.1371/journal.pmed.1002376), 2017-08-22
Supplement: pmed.1002376.s008.pdf [file pmed.1002376.s008.pdf]

**S1 Table.** Characteristics of the three study populations.

|                               | ALSPAC [N= 2440] |              |              | NFBC86 [N= 2937] |              |              | NFBC66 [N= 4874] |              |
|-------------------------------|------------------|--------------|--------------|------------------|--------------|--------------|------------------|--------------|
|                               | Mother           | Father       | Offspring    | Mother           | Father       | Offspring    | Mother           | Offspring    |
| <b>Age [years]</b>            | 29.39 (4.33)     | 31.38 (5.37) | 17.14 (1.08) | 28.08 (5.02)     | 30.31 (5.44) | 16.01 (0.37) | 28.00 (6.60)     | 31.10 (0.36) |
| <b>Males [%]</b>              | -                | -            | 48           | -                | -            | 50           | -                | 48           |
| <b>BMI [kg/m<sup>2</sup>]</b> | 22.93 (3.83)     | 25.11 (3.14) | 22.37 (3.78) | 22.20 (3.09)     | 23.98 (2.63) | 21.05 (3.29) | 23.22 (3.25)     | 24.61 (4.13) |
| underweight [%]               | 5                | 1            | 10           | 6                | 0            | 19           | 3                | 2            |
| normal [%]                    | 75               | 52           | 70           | 79               | 68           | 70           | 74               | 58           |
| overweigh [%]                 | 14               | 40           | 14           | 12               | 29           | 8            | 19               | 31           |
| obese [%]                     | 6                | 7            | 7            | 3                | 3            | 3            | 4                | 9            |
| <b>Parity</b>                 | 0.69 (0.84)      |              |              | 1.37 (1.68)      |              |              | 2.86 (2.20)      |              |
| <b>Smoking [%]</b>            |                  |              |              |                  |              |              |                  |              |
| Non-smoker                    | 79               | 74           |              | 77               | 67           |              | 81               |              |
| Pre/early pregnancy           | 11               |              |              | 14               |              |              | 7                |              |
| Through pregnancy             | 10               |              |              | 9                |              |              | 13               |              |
| Smoker                        |                  | 26           |              |                  | 33           |              |                  |              |

*Trios of mother-father-offspring (ALSPAC, NFBC86) or pairs of mother-offspring (NFBC66) who contributed to at least one pair of exposure/outcome analysis. Values are mean (SD) or percentage. Body Mass Index (BMI) categorized according to World Health Organization categories (underweight<18.5 kg/m<sup>2</sup>; normal 18.5-24.9 kg/m<sup>2</sup>; overweight 25.0-29.9 kg/m<sup>2</sup>; obese≥30.0 kg/m<sup>2</sup>) for descriptive purposes only, all statistical analyses were conducted using BMI as a continuous variable.*

S1 Table continued.

| category 1                                | ALSPAC [N=2440]  |        |        | NFBC86 [N= 2937]        |        |                | NFBC66 [N= 4874]                     |        |
|-------------------------------------------|------------------|--------|--------|-------------------------|--------|----------------|--------------------------------------|--------|
|                                           | category 2       | Mother | Father | category 2              | Mother | Father         | category 2                           | Mother |
| <b>Education [%]</b>                      |                  |        |        |                         |        |                |                                      |        |
| Basic or none                             | None             | 0      | 0      | No occupational educ.   | 7      | 12             | none or circulating school           | 1      |
|                                           |                  |        |        |                         |        |                | 1-4 years of primary education       | 8      |
| Secondary                                 | CSE              | 8      | 13     | Vocational course       | 9      | 15             | 5-8 years primary or early secondary | 56     |
|                                           | Vocational       | 7      | 6      | Vocational school       | 22     | 33             | 0.5-2 years of vocational school     | 16     |
|                                           | O level          | 35     | 22     |                         |        |                | > 2 years of vocational school       | 3      |
|                                           | A level          | 29     | 30     |                         |        |                | Secondary school                     | 7      |
| Higher                                    | Degree           | 21     | 29     | Post-secondary college  | 36     | 22             | Beyond secondary                     | 1      |
|                                           |                  |        |        | Polytechnic             | 3      | 2              | Beyond matriculation exam            | 4      |
|                                           |                  |        |        | University degree       | 10     | 10             |                                      |        |
| Other                                     |                  |        |        | Other education         | 8      | 5              |                                      |        |
|                                           |                  |        |        | Uncompleted educ.       | 4      | 1              |                                      |        |
| <b>Head of household social class (%)</b> |                  |        |        |                         |        |                |                                      |        |
| I                                         | I                | 20     |        | entrepreneur            | 12     |                | I                                    | 9      |
|                                           |                  |        |        | II                      | 47     | professional   | 9                                    | II     |
| III                                       | III (non-manual) | 22     |        | skilled non-manual      | 29     |                | III                                  | 58     |
|                                           |                  |        |        | III (manual)            | 7      | skilled manual | 44                                   |        |
| IV                                        | IV               | 3      |        | unskilled or apprentice | 3      |                | IV                                   | 13     |
|                                           |                  |        |        | no-occupation           | 3      |                | V (no occupation)                    | 0      |

*Trios of mother-father-offspring (ALSPAC, NFBC86) or pairs of mother-offspring (NFBC66) who contributed to at least one pair of exposure/outcome analysis. Values are mean (SD) or percentage. Category 1= harmonized categories across the three cohorts used on one-stage individual participant data meta-analysis; Category 2= cohort specific categories used on two-stage individual participant (aggregate) data meta-analysis.*
