# Supplementary material for: Association of pre-pregnancy body mass index with offspring metabolic profile: Analyses of 3 European prospective birth cohorts
Source: PubMed Central journal article supplement (PMC5568725; doi:10.1371/journal.pmed.1002376), 2017-08-22
Supplement: pmed.1002376.s009.pdf [file pmed.1002376.s009.pdf]

**S2 Table.** Characteristics of the metabolic traits classes.

| <b>Metabolic traits class<br/>(N=number of traits)</b> | <b>Metabolic traits</b>                                                                                                                                 |
|--------------------------------------------------------|---------------------------------------------------------------------------------------------------------------------------------------------------------|
| Extremely large VLDL (7)                               | particle concentration, total lipids, phospholipids, total cholesterol, cholesterol esters, free cholesterol, triglycerides                             |
| Very large VLDL (7)                                    | particle concentration, total lipids, phospholipids, total cholesterol, cholesterol esters, free cholesterol, triglycerides                             |
| Large VLDL (7)                                         | particle concentration, total lipids, phospholipids, total cholesterol, cholesterol esters, free cholesterol, triglycerides                             |
| Medium VLDL (7)                                        | particle concentration, total lipids, phospholipids, total cholesterol, cholesterol esters, free cholesterol, triglycerides                             |
| Small VLDL (7)                                         | particle concentration, total lipids, phospholipids, total cholesterol, cholesterol esters, free cholesterol, triglycerides                             |
| Very small VLDL (7)                                    | particle concentration, total lipids, phospholipids, total cholesterol, cholesterol esters, free cholesterol, triglycerides                             |
| IDL (7)                                                | particle concentration, total lipids, phospholipids, total cholesterol, cholesterol esters, free cholesterol, triglycerides                             |
| Large LDL (7)                                          | particle concentration, total lipids, phospholipids, total cholesterol, cholesterol esters, free cholesterol, triglycerides                             |
| Medium LDL (7)                                         | particle concentration, total lipids, phospholipids, total cholesterol, cholesterol esters, free cholesterol, triglycerides                             |
| Small LDL (7)                                          | particle concentration, total lipids, phospholipids, total cholesterol, cholesterol esters, free cholesterol, triglycerides                             |
| Very large HDL (7)                                     | particle concentration, total lipids, phospholipids, total cholesterol, cholesterol esters, free cholesterol, triglycerides                             |
| Large HDL (7)                                          | particle concentration, total lipids, phospholipids, total cholesterol, cholesterol esters, free cholesterol, triglycerides                             |
| Medium HDL (7)                                         | particle concentration, total lipids, phospholipids, total cholesterol, cholesterol esters, free cholesterol, triglycerides                             |
| Small HDL (7)                                          | particle concentration, total lipids, phospholipids, total cholesterol, cholesterol esters, free cholesterol, triglycerides                             |
| Cholesterol (9)                                        | total, VLDL, remnant, LDL, HDL, HDL <sub>2</sub> , HDL <sub>3</sub> , esterified, and free cholesterol                                                  |
| Glycerides and phospholipids (7)                       | triglycerides, VLDL, LDL, and HDL triglycerides, phosphoglycerides, phosphatidylcholine, and cholines.                                                  |
| Fatty acids (9)                                        | total fatty acids, degree of unsaturation, docosahexaenoic acid, linoleic acid, n-3 fatty acids, n-6 fatty acids, saturated fatty acids, PUFA, and MUFA |
| Fatty acids ratios (7)                                 | docosahexaenoic acid (%), linoleic acid (%), n-3 fatty acids (%), n-6 fatty acids (%), PUFA (%), MUFA (%), and saturated fatty acids (%)                |
| Lipoprotein particle size (3)                          | VLDL, LDL and HDL particles sizes                                                                                                                       |
| Apolipoproteins (2)                                    | apolipoprotein A-I and B                                                                                                                                |
| Glycolysis related metabolites (4)                     | glucose, lactate, pyruvate, and citrate                                                                                                                 |
| Amino acids (3)                                        | alanine, glutamine and histidine                                                                                                                        |

|                                |                                                 |
|--------------------------------|-------------------------------------------------|
| Branched-chain amino acids (3) | isoleucine, leucine and valine                  |
| Aromatic amino acids (2)       | phenylalanine and tyrosine                      |
| Ketone bodies (3)              | acetate, acetoacetate, and beta-hydroxybutyrate |
| Fluid balance (2)              | creatinine and albumin                          |
| Inflammation (1)               | glycoprotein acetyls                            |

*VLDL=very-low-density lipoprotein; IDL=intermediate-density lipoprotein; LDL=low-density lipoprotein; HDL=high-density lipoprotein; MUFA=monounsaturated fatty acids; PUFA=polyunsaturated fatty acids.*
