# Supplementary material for: Association of pre-pregnancy body mass index with offspring metabolic profile: Analyses of 3 European prospective birth cohorts
Source: PubMed Central journal article supplement (PMC5568725; doi:10.1371/journal.pmed.1002376), 2017-08-22
Supplement: pmed.1002376.s010.pdf [file pmed.1002376.s010.pdf]

S3 Table. One-stage individual participant data (IPD) meta-analysis: offspring lipoproteins, lipids and metabolites absolute concentration differences per 1-SD higher parental BMI.

| One stage-Individual Participant Data meta-analysis |                                                                                         |                                                                                        |            |
|-----------------------------------------------------|-----------------------------------------------------------------------------------------|----------------------------------------------------------------------------------------|------------|
| Metabolites                                         | mother                                                                                  | father                                                                                 | $P_{boot}$ |
| <b>Lipoprotein subclasses</b>                       |                                                                                         |                                                                                        |            |
| <i>Extremely large VLDL</i>                         |                                                                                         |                                                                                        |            |
| Particle concentration (mol/l)                      | $6 \times 10^{-12}$ ( $3 \times 10^{-12}$ , $8 \times 10^{-12}$ ) $p=4 \times 10^{-6}$  | $4 \times 10^{-12}$ ( $1 \times 10^{-12}$ , $6 \times 10^{-12}$ ) $p=1 \times 10^{-3}$ | 0.25       |
| Total lipids (mmol/l)                               | $1 \times 10^{-3}$ ( $7 \times 10^{-4}$ , $2 \times 10^{-3}$ ) $p=4 \times 10^{-6}$     | $8 \times 10^{-4}$ ( $3 \times 10^{-4}$ , $1 \times 10^{-3}$ ) $p=2 \times 10^{-3}$    | 0.26       |
| Phospholipids (mmol/l)                              | $1 \times 10^{-4}$ ( $8 \times 10^{-5}$ , $2 \times 10^{-4}$ ) $p=9 \times 10^{-6}$     | $1 \times 10^{-4}$ ( $4 \times 10^{-5}$ , $2 \times 10^{-4}$ ) $p=1 \times 10^{-3}$    | 0.35       |
| Total cholesterol (mmol/l)                          | $2 \times 10^{-4}$ ( $1 \times 10^{-4}$ , $3 \times 10^{-4}$ ) $p=8 \times 10^{-6}$     | $2 \times 10^{-4}$ ( $6 \times 10^{-5}$ , $2 \times 10^{-4}$ ) $p=2 \times 10^{-3}$    | 0.28       |
| Cholesterol esters (mmol/l)                         | $1 \times 10^{-4}$ ( $7 \times 10^{-5}$ , $2 \times 10^{-4}$ ) $p=1 \times 10^{-5}$     | $8 \times 10^{-5}$ ( $3 \times 10^{-5}$ , $1 \times 10^{-4}$ ) $p=4 \times 10^{-3}$    | 0.24       |
| Free cholesterol (mmol/l)                           | $9.5 \times 10^{-5}$ ( $5 \times 10^{-5}$ , $1 \times 10^{-4}$ ) $p=8 \times 10^{-6}$   | $7 \times 10^{-5}$ ( $3 \times 10^{-5}$ , $1 \times 10^{-4}$ ) $p=8 \times 10^{-4}$    | 0.38       |
| Triglycerides (mmol/l)                              | $9 \times 10^{-4}$ ( $5 \times 10^{-4}$ , $1 \times 10^{-3}$ ) $p=4 \times 10^{-6}$     | $6 \times 10^{-4}$ ( $2 \times 10^{-4}$ , $9 \times 10^{-4}$ ) $p=2 \times 10^{-3}$    | 0.24       |
| <i>Very large VLDL</i>                              |                                                                                         |                                                                                        |            |
| Particle concentration (mol/l)                      | $3 \times 10^{-11}$ ( $2 \times 10^{-11}$ , $5 \times 10^{-11}$ ) $p=2 \times 10^{-6}$  | $3 \times 10^{-11}$ ( $1 \times 10^{-11}$ , $4 \times 10^{-11}$ ) $p=1 \times 10^{-4}$ | 0.45       |
| Total lipids (mmol/l)                               | $3 \times 10^{-3}$ ( $2 \times 10^{-3}$ , $4 \times 10^{-3}$ ) $p=2 \times 10^{-6}$     | $3 \times 10^{-3}$ ( $1 \times 10^{-3}$ , $4 \times 10^{-3}$ ) $p=1 \times 10^{-4}$    | 0.46       |
| Phospholipids (mmol/l)                              | $5 \times 10^{-4}$ ( $3 \times 10^{-4}$ , $7 \times 10^{-4}$ ) $p=3 \times 10^{-6}$     | $4 \times 10^{-4}$ ( $2 \times 10^{-4}$ , $6 \times 10^{-4}$ ) $p=2 \times 10^{-4}$    | 0.46       |
| Total cholesterol (mmol/l)                          | $6 \times 10^{-4}$ ( $4 \times 10^{-4}$ , $9 \times 10^{-4}$ ) $p=6 \times 10^{-6}$     | $5 \times 10^{-4}$ ( $2 \times 10^{-4}$ , $7 \times 10^{-4}$ ) $p=7 \times 10^{-4}$    | 0.35       |
| Cholesterol esters (mmol/l)                         | $3 \times 10^{-4}$ ( $2 \times 10^{-4}$ , $5 \times 10^{-4}$ ) $p=7 \times 10^{-6}$     | $2 \times 10^{-4}$ ( $9 \times 10^{-5}$ , $4 \times 10^{-4}$ ) $p=1 \times 10^{-3}$    | 0.30       |
| Free cholesterol (mmol/l)                           | $3 \times 10^{-4}$ ( $2 \times 10^{-4}$ , $4 \times 10^{-4}$ ) $p=6 \times 10^{-6}$     | $2 \times 10^{-4}$ ( $1 \times 10^{-4}$ , $4 \times 10^{-4}$ ) $p=4 \times 10^{-4}$    | 0.43       |
| Triglycerides (mmol/l)                              | $2 \times 10^{-3}$ ( $1 \times 10^{-3}$ , $3 \times 10^{-3}$ ) $p=2 \times 10^{-6}$     | $2 \times 10^{-3}$ ( $8 \times 10^{-4}$ , $2 \times 10^{-3}$ ) $p=8 \times 10^{-5}$    | 0.49       |
| <i>Large VLDL</i>                                   |                                                                                         |                                                                                        |            |
| Particle concentration (mol/l)                      | $2 \times 10^{-10}$ ( $10 \times 10^{-11}$ , $2 \times 10^{-10}$ ) $p=2 \times 10^{-6}$ | $1 \times 10^{-10}$ ( $8 \times 10^{-11}$ , $2 \times 10^{-10}$ ) $p=3 \times 10^{-5}$ | 0.62       |
| Total lipids (mmol/l)                               | 0.01 (0.01, 0.01) $p=1 \times 10^{-6}$                                                  | 0.01 ( $5 \times 10^{-3}$ , 0.01) $p=3 \times 10^{-5}$                                 | 0.58       |
| Phospholipids (mmol/l)                              | $2 \times 10^{-3}$ ( $1 \times 10^{-3}$ , $3 \times 10^{-3}$ ) $p=1 \times 10^{-6}$     | $2 \times 10^{-3}$ ( $8 \times 10^{-4}$ , $2 \times 10^{-3}$ ) $p=3 \times 10^{-5}$    | 0.59       |
| Total cholesterol (mmol/l)                          | $2 \times 10^{-3}$ ( $1 \times 10^{-3}$ , $3 \times 10^{-3}$ ) $p=2 \times 10^{-6}$     | $2 \times 10^{-3}$ ( $9 \times 10^{-4}$ , $3 \times 10^{-3}$ ) $p=1 \times 10^{-4}$    | 0.44       |
| Cholesterol esters (mmol/l)                         | $1 \times 10^{-3}$ ( $7 \times 10^{-4}$ , $2 \times 10^{-3}$ ) $p=3 \times 10^{-6}$     | $9 \times 10^{-4}$ ( $4 \times 10^{-4}$ , $1 \times 10^{-3}$ ) $p=5 \times 10^{-4}$    | 0.34       |
| Free cholesterol (mmol/l)                           | $1 \times 10^{-3}$ ( $7 \times 10^{-4}$ , $2 \times 10^{-3}$ ) $p=2 \times 10^{-6}$     | $9.9 \times 10^{-4}$ ( $5 \times 10^{-4}$ , $1 \times 10^{-3}$ ) $p=5 \times 10^{-5}$  | 0.58       |
| Triglycerides (mmol/l)                              | 0.01 ( $4 \times 10^{-3}$ , 0.01) $p=1 \times 10^{-6}$                                  | 0.01 ( $3 \times 10^{-3}$ , 0.01) $p=2 \times 10^{-5}$                                 | 0.65       |
| <i>Medium VLDL</i>                                  |                                                                                         |                                                                                        |            |
| Particle concentration (mol/l)                      | $4 \times 10^{-10}$ ( $3 \times 10^{-10}$ , $6 \times 10^{-10}$ ) $p=5 \times 10^{-7}$  | $4 \times 10^{-10}$ ( $2 \times 10^{-10}$ , $5 \times 10^{-10}$ ) $p=1 \times 10^{-5}$ | 0.61       |
| Total lipids (mmol/l)                               | 0.02 (0.01, 0.02) $p=4 \times 10^{-7}$                                                  | 0.01 (0.01, 0.02) $p=1 \times 10^{-5}$                                                 | 0.57       |
| Phospholipids (mmol/l)                              | $3 \times 10^{-3}$ ( $2 \times 10^{-3}$ , $4 \times 10^{-3}$ ) $p=6 \times 10^{-7}$     | $2 \times 10^{-3}$ ( $1 \times 10^{-3}$ , $4 \times 10^{-3}$ ) $p=2 \times 10^{-5}$    | 0.60       |
| Total cholesterol (mmol/l)                          | $4 \times 10^{-3}$ ( $2 \times 10^{-3}$ , 0.01) $p=9 \times 10^{-7}$                    | $3 \times 10^{-3}$ ( $2 \times 10^{-3}$ , $5 \times 10^{-3}$ ) $p=1 \times 10^{-4}$    | 0.40       |
| Cholesterol esters (mmol/l)                         | $2 \times 10^{-3}$ ( $1 \times 10^{-3}$ , $3 \times 10^{-3}$ ) $p=1 \times 10^{-6}$     | $2 \times 10^{-3}$ ( $7 \times 10^{-4}$ , $2 \times 10^{-3}$ ) $p=7 \times 10^{-4}$    | 0.26       |
| Free cholesterol (mmol/l)                           | $2 \times 10^{-3}$ ( $1 \times 10^{-3}$ , $2 \times 10^{-3}$ ) $p=2 \times 10^{-6}$     | $2 \times 10^{-3}$ ( $8 \times 10^{-4}$ , $2 \times 10^{-3}$ ) $p=3 \times 10^{-5}$    | 0.66       |
| Triglycerides (mmol/l)                              | 0.01 (0.01, 0.01) $p=3 \times 10^{-7}$                                                  | 0.01 ( $4 \times 10^{-3}$ , 0.01) $p=5 \times 10^{-6}$                                 | 0.67       |
| <i>Small VLDL</i>                                   |                                                                                         |                                                                                        |            |
| Particle concentration (mol/l)                      | $5 \times 10^{-10}$ ( $3 \times 10^{-10}$ , $7 \times 10^{-10}$ ) $p=3 \times 10^{-6}$  | $4 \times 10^{-10}$ ( $2 \times 10^{-10}$ , $6 \times 10^{-10}$ ) $p=2 \times 10^{-5}$ | 0.83       |
| Total lipids (mmol/l)                               | 0.01 (0.01, 0.01) $p=2 \times 10^{-6}$                                                  | 0.01 ( $5 \times 10^{-3}$ , 0.01) $p=3 \times 10^{-5}$                                 | 0.76       |
| Phospholipids (mmol/l)                              | $2 \times 10^{-3}$ ( $1 \times 10^{-3}$ , $3 \times 10^{-3}$ ) $p=1 \times 10^{-5}$     | $2 \times 10^{-3}$ ( $9.9 \times 10^{-4}$ , $3 \times 10^{-3}$ ) $p=2 \times 10^{-5}$  | 0.99       |
| Total cholesterol (mmol/l)                          | $3 \times 10^{-3}$ ( $2 \times 10^{-3}$ , 0.01) $p=2 \times 10^{-5}$                    | $3 \times 10^{-3}$ ( $1 \times 10^{-3}$ , $4 \times 10^{-3}$ ) $p=7 \times 10^{-4}$    | 0.56       |
| Cholesterol esters (mmol/l)                         | $2 \times 10^{-3}$ ( $1 \times 10^{-3}$ , $3 \times 10^{-3}$ ) $p=4 \times 10^{-5}$     | $2 \times 10^{-3}$ ( $6 \times 10^{-4}$ , $3 \times 10^{-3}$ ) $p=3 \times 10^{-3}$    | 0.39       |
| Free cholesterol (mmol/l)                           | $1 \times 10^{-3}$ ( $6 \times 10^{-4}$ , $2 \times 10^{-3}$ ) $p=5 \times 10^{-5}$     | $1 \times 10^{-3}$ ( $6 \times 10^{-4}$ , $2 \times 10^{-3}$ ) $p=8 \times 10^{-5}$    | 0.99       |
| Triglycerides (mmol/l)                              | $4 \times 10^{-3}$ ( $2 \times 10^{-3}$ , 0.01) $p=2 \times 10^{-6}$                    | $4 \times 10^{-3}$ ( $2 \times 10^{-3}$ , 0.01) $p=1 \times 10^{-5}$                   | 0.87       |
| <i>Very Small VLDL</i>                              |                                                                                         |                                                                                        |            |
| Particle concentration (mol/l)                      | $3 \times 10^{-10}$ ( $7 \times 10^{-11}$ , $5 \times 10^{-10}$ ) $p=0.01$              | $2 \times 10^{-10}$ ( $4 \times 10^{-11}$ , $4 \times 10^{-10}$ ) $p=0.02$             | 0.81       |
| Total lipids (mmol/l)                               | $4 \times 10^{-3}$ ( $1 \times 10^{-3}$ , 0.01) $p=2 \times 10^{-3}$                    | $3 \times 10^{-3}$ ( $3 \times 10^{-4}$ , 0.01) $p=0.03$                               | 0.54       |
| Phospholipids (mmol/l)                              | $9 \times 10^{-4}$ ( $1 \times 10^{-4}$ , $2 \times 10^{-3}$ ) $p=0.02$                 | $7 \times 10^{-4}$ ( $-2 \times 10^{-4}$ , $2 \times 10^{-3}$ ) $p=0.12$               | 0.64       |
| Total cholesterol (mmol/l)                          | $2 \times 10^{-3}$ ( $6 \times 10^{-4}$ , $4 \times 10^{-3}$ ) $p=0.01$                 | $1 \times 10^{-3}$ ( $-4 \times 10^{-4}$ , $3 \times 10^{-3}$ ) $p=0.13$               | 0.36       |
| Cholesterol esters (mmol/l)                         | $2 \times 10^{-3}$ ( $7 \times 10^{-4}$ , $3 \times 10^{-3}$ ) $p=2 \times 10^{-3}$     | $9 \times 10^{-4}$ ( $-3 \times 10^{-4}$ , $2 \times 10^{-3}$ ) $p=0.13$               | 0.21       |
| Free cholesterol (mmol/l)                           | $3 \times 10^{-4}$ ( $-1 \times 10^{-4}$ , $7 \times 10^{-4}$ ) $p=0.18$                | $3 \times 10^{-4}$ ( $-2 \times 10^{-4}$ , $8 \times 10^{-4}$ ) $p=0.19$               | 0.98       |
| Triglycerides (mmol/l)                              | $1 \times 10^{-3}$ ( $4 \times 10^{-4}$ , $2 \times 10^{-3}$ ) $p=7 \times 10^{-4}$     | $1 \times 10^{-3}$ ( $5 \times 10^{-4}$ , $2 \times 10^{-3}$ ) $p=5 \times 10^{-4}$    | 0.83       |
| <i>IDL</i>                                          |                                                                                         |                                                                                        |            |
| Particle concentration (mol/l)                      | $4 \times 10^{-10}$ ( $-1 \times 10^{-10}$ , $9 \times 10^{-10}$ ) $p=0.14$             | $2 \times 10^{-10}$ ( $-4 \times 10^{-10}$ , $7 \times 10^{-10}$ ) $p=0.54$            | 0.53       |
| Total lipids (mmol/l)                               | $5 \times 10^{-3}$ ( $-1 \times 10^{-3}$ , 0.01) $p=0.12$                               | $2 \times 10^{-3}$ ( $-4 \times 10^{-3}$ , 0.01) $p=0.53$                              | 0.49       |
| Phospholipids (mmol/l)                              | $9 \times 10^{-4}$ ( $-5 \times 10^{-4}$ , $2 \times 10^{-3}$ ) $p=0.22$                | $3 \times 10^{-4}$ ( $-1 \times 10^{-3}$ , $2 \times 10^{-3}$ ) $p=0.70$               | 0.54       |

S3 Table. One-stage individual participant data (IPD) meta-analysis: offspring lipoproteins, lipids and metabolites absolute concentration differences per 1-SD higher parental BMI.

| One stage-Individual Participant Data meta-analysis |                                                                                         |                                                                                          |            |
|-----------------------------------------------------|-----------------------------------------------------------------------------------------|------------------------------------------------------------------------------------------|------------|
| Metabolites                                         | mother                                                                                  | father                                                                                   | $P_{boot}$ |
| Total cholesterol (mmol/l)                          | $4 \times 10^{-3}$ ( $-4 \times 10^{-4}$ , 0.01) $p=0.08$                               | $1 \times 10^{-3}$ ( $-3 \times 10^{-3}$ , 0.01) $p=0.54$                                | 0.40       |
| Cholesterol esters (mmol/l)                         | $3 \times 10^{-3}$ ( $3 \times 10^{-4}$ , 0.01) $p=0.03$                                | $1 \times 10^{-3}$ ( $-2 \times 10^{-3}$ , $4 \times 10^{-3}$ ) $p=0.37$                 | 0.35       |
| Free cholesterol (mmol/l)                           | $4 \times 10^{-4}$ ( $-8 \times 10^{-4}$ , $2 \times 10^{-3}$ ) $p=0.53$                | $-9 \times 10^{-5}$ ( $-1 \times 10^{-3}$ , $1 \times 10^{-3}$ ) $p=0.88$                | 0.56       |
| Triglycerides (mmol/l)                              | $2 \times 10^{-4}$ ( $-4 \times 10^{-4}$ , $8 \times 10^{-4}$ ) $p=0.55$                | $5 \times 10^{-4}$ ( $-2 \times 10^{-4}$ , $1 \times 10^{-3}$ ) $p=0.16$                 | 0.51       |
| <b>Large LDL</b>                                    |                                                                                         |                                                                                          |            |
| Particle concentration (mol/l)                      | $7 \times 10^{-10}$ ( $-2 \times 10^{-10}$ , $2 \times 10^{-9}$ ) $p=0.13$              | $5 \times 10^{-10}$ ( $-5 \times 10^{-10}$ , $1 \times 10^{-9}$ ) $p=0.34$               | 0.71       |
| Total lipids (mmol/l)                               | 0.01 ( $-2 \times 10^{-3}$ , 0.01) $p=0.14$                                             | $3 \times 10^{-3}$ ( $-4 \times 10^{-3}$ , 0.01) $p=0.38$                                | 0.70       |
| Phospholipids (mmol/l)                              | $1 \times 10^{-3}$ ( $-9.7 \times 10^{-5}$ , $3 \times 10^{-3}$ ) $p=0.07$              | $9 \times 10^{-4}$ ( $-7 \times 10^{-4}$ , $2 \times 10^{-3}$ ) $p=0.25$                 | 0.64       |
| Total cholesterol (mmol/l)                          | $4 \times 10^{-3}$ ( $-1 \times 10^{-3}$ , 0.01) $p=0.13$                               | $2 \times 10^{-3}$ ( $-3 \times 10^{-3}$ , 0.01) $p=0.43$                                | 0.62       |
| Cholesterol esters (mmol/l)                         | $3 \times 10^{-3}$ ( $-5 \times 10^{-4}$ , 0.01) $p=0.09$                               | $2 \times 10^{-3}$ ( $-2 \times 10^{-3}$ , 0.01) $p=0.33$                                | 0.62       |
| Free cholesterol (mmol/l)                           | $5 \times 10^{-4}$ ( $-7 \times 10^{-4}$ , $2 \times 10^{-3}$ ) $p=0.40$                | $1 \times 10^{-4}$ ( $-1 \times 10^{-3}$ , $1 \times 10^{-3}$ ) $p=0.84$                 | 0.65       |
| Triglycerides (mmol/l)                              | $-1 \times 10^{-4}$ ( $-7 \times 10^{-4}$ , $5 \times 10^{-4}$ ) $p=0.72$               | $3 \times 10^{-4}$ ( $-4 \times 10^{-4}$ , $9 \times 10^{-4}$ ) $p=0.45$                 | 0.41       |
| <b>Medium LDL</b>                                   |                                                                                         |                                                                                          |            |
| Particle concentration (mol/l)                      | $7 \times 10^{-10}$ ( $-9 \times 10^{-11}$ , $1 \times 10^{-9}$ ) $p=0.08$              | $5 \times 10^{-10}$ ( $-3 \times 10^{-10}$ , $1 \times 10^{-9}$ ) $p=0.22$               | 0.76       |
| Total lipids (mmol/l)                               | $4 \times 10^{-3}$ ( $-8 \times 10^{-4}$ , 0.01) $p=0.11$                               | $3 \times 10^{-3}$ ( $-2 \times 10^{-3}$ , 0.01) $p=0.27$                                | 0.76       |
| Phospholipids (mmol/l)                              | $1 \times 10^{-3}$ ( $2 \times 10^{-4}$ , $2 \times 10^{-3}$ ) $p=0.02$                 | $7 \times 10^{-4}$ ( $-2 \times 10^{-4}$ , $2 \times 10^{-3}$ ) $p=0.13$                 | 0.56       |
| Total cholesterol (mmol/l)                          | $3 \times 10^{-3}$ ( $-7 \times 10^{-4}$ , 0.01) $p=0.12$                               | $2 \times 10^{-3}$ ( $-2 \times 10^{-3}$ , 0.01) $p=0.32$                                | 0.72       |
| Cholesterol esters (mmol/l)                         | $2 \times 10^{-3}$ ( $-5 \times 10^{-4}$ , $5 \times 10^{-3}$ ) $p=0.11$                | $2 \times 10^{-3}$ ( $-1 \times 10^{-3}$ , $4 \times 10^{-3}$ ) $p=0.28$                 | 0.74       |
| Free cholesterol (mmol/l)                           | $4 \times 10^{-4}$ ( $-2 \times 10^{-4}$ , $1 \times 10^{-3}$ ) $p=0.19$                | $2 \times 10^{-4}$ ( $-4 \times 10^{-4}$ , $9 \times 10^{-4}$ ) $p=0.52$                 | 0.66       |
| Triglycerides (mmol/l)                              | $-9.5 \times 10^{-5}$ ( $-4 \times 10^{-4}$ , $2 \times 10^{-4}$ ) $p=0.58$             | $1 \times 10^{-4}$ ( $-2 \times 10^{-4}$ , $5 \times 10^{-4}$ ) $p=0.51$                 | 0.37       |
| <b>Small LDL</b>                                    |                                                                                         |                                                                                          |            |
| Particle concentration (mol/l)                      | $6 \times 10^{-10}$ ( $-2 \times 10^{-10}$ , $1 \times 10^{-9}$ ) $p=0.15$              | $6 \times 10^{-10}$ ( $-3 \times 10^{-10}$ , $1 \times 10^{-9}$ ) $p=0.22$               | 0.92       |
| Total lipids (mmol/l)                               | $2 \times 10^{-3}$ ( $-7 \times 10^{-4}$ , $5 \times 10^{-3}$ ) $p=0.15$                | $2 \times 10^{-3}$ ( $-1 \times 10^{-3}$ , $4 \times 10^{-3}$ ) $p=0.26$                 | 0.86       |
| Phospholipids (mmol/l)                              | $5 \times 10^{-4}$ ( $-8 \times 10^{-5}$ , $1 \times 10^{-3}$ ) $p=0.09$                | $5 \times 10^{-4}$ ( $-2 \times 10^{-4}$ , $1 \times 10^{-3}$ ) $p=0.15$                 | 0.89       |
| Total cholesterol (mmol/l)                          | $1 \times 10^{-3}$ ( $-7 \times 10^{-4}$ , $3 \times 10^{-3}$ ) $p=0.20$                | $9 \times 10^{-4}$ ( $-1 \times 10^{-3}$ , $3 \times 10^{-3}$ ) $p=0.38$                 | 0.80       |
| Cholesterol esters (mmol/l)                         | $1 \times 10^{-3}$ ( $-5 \times 10^{-4}$ , $3 \times 10^{-3}$ ) $p=0.17$                | $8 \times 10^{-4}$ ( $-9 \times 10^{-4}$ , $2 \times 10^{-3}$ ) $p=0.35$                 | 0.78       |
| Free cholesterol (mmol/l)                           | $2 \times 10^{-4}$ ( $-2 \times 10^{-4}$ , $6 \times 10^{-4}$ ) $p=0.38$                | $1 \times 10^{-4}$ ( $-3 \times 10^{-4}$ , $5 \times 10^{-4}$ ) $p=0.51$                 | 0.89       |
| Triglycerides (mmol/l)                              | $1 \times 10^{-4}$ ( $-7 \times 10^{-5}$ , $4 \times 10^{-4}$ ) $p=0.18$                | $2 \times 10^{-4}$ ( $7 \times 10^{-6}$ , $5 \times 10^{-4}$ ) $p=0.04$                  | 0.56       |
| <b>Very large HDL</b>                               |                                                                                         |                                                                                          |            |
| Particle concentration (mol/l)                      | $-1 \times 10^{-8}$ ( $-2 \times 10^{-8}$ , $-8 \times 10^{-9}$ ) $p=3 \times 10^{-9}$  | $-1 \times 10^{-8}$ ( $-1 \times 10^{-8}$ , $-6 \times 10^{-9}$ ) $p=2 \times 10^{-6}$   | 0.52       |
| Total lipids (mmol/l)                               | -0.01 (-0.02, -0.01) $p=9.6 \times 10^{-10}$                                            | -0.01 (-0.02, -0.01) $p=5 \times 10^{-7}$                                                | 0.58       |
| Phospholipids (mmol/l)                              | -0.01 (-0.01, -0.01) $p=1 \times 10^{-10}$                                              | -0.01 (-0.01, $-4 \times 10^{-3}$ ) $p=3 \times 10^{-7}$                                 | 0.48       |
| Total cholesterol (mmol/l)                          | -0.01 (-0.01, $-4 \times 10^{-3}$ ) $p=7 \times 10^{-8}$                                | -0.01 (-0.01, $-3 \times 10^{-3}$ ) $p=3 \times 10^{-6}$                                 | 0.70       |
| Cholesterol esters (mmol/l)                         | $-4 \times 10^{-3}$ (-0.01, $-3 \times 10^{-3}$ ) $p=4 \times 10^{-7}$                  | $-4 \times 10^{-3}$ (-0.01, $-2 \times 10^{-3}$ ) $p=9 \times 10^{-6}$                   | 0.73       |
| Free cholesterol (mmol/l)                           | $-2 \times 10^{-3}$ ( $-2 \times 10^{-3}$ , $-1 \times 10^{-3}$ ) $p=5 \times 10^{-9}$  | $-2 \times 10^{-3}$ ( $-2 \times 10^{-3}$ , $-9.6 \times 10^{-4}$ ) $p=7 \times 10^{-7}$ | 0.66       |
| Triglycerides (mmol/l)                              | $-2 \times 10^{-4}$ ( $-3 \times 10^{-4}$ , $-2 \times 10^{-5}$ ) $p=0.03$              | $-1 \times 10^{-4}$ ( $-3 \times 10^{-4}$ , $2 \times 10^{-5}$ ) $p=0.10$                | 0.70       |
| <b>Large HDL</b>                                    |                                                                                         |                                                                                          |            |
| Particle concentration (mol/l)                      | $-3 \times 10^{-8}$ ( $-4 \times 10^{-8}$ , $-2 \times 10^{-8}$ ) $p=4 \times 10^{-8}$  | $-2 \times 10^{-8}$ ( $-3 \times 10^{-8}$ , $-1 \times 10^{-8}$ ) $p=5 \times 10^{-5}$   | 0.31       |
| Total lipids (mmol/l)                               | -0.02 (-0.02, -0.01) $p=5 \times 10^{-9}$                                               | -0.01 (-0.02, -0.01) $p=3 \times 10^{-5}$                                                | 0.26       |
| Phospholipids (mmol/l)                              | -0.01 (-0.01, $-5 \times 10^{-3}$ ) $p=5 \times 10^{-8}$                                | -0.01 (-0.01, $-2 \times 10^{-3}$ ) $p=3 \times 10^{-4}$                                 | 0.21       |
| Total cholesterol (mmol/l)                          | -0.01 (-0.01, -0.01) $p=3 \times 10^{-10}$                                              | -0.01 (-0.01, $-5 \times 10^{-3}$ ) $p=3 \times 10^{-6}$                                 | 0.27       |
| Cholesterol esters (mmol/l)                         | -0.01 (-0.01, -0.01) $p=2 \times 10^{-10}$                                              | -0.01 (-0.01, $-4 \times 10^{-3}$ ) $p=4 \times 10^{-6}$                                 | 0.25       |
| Free cholesterol (mmol/l)                           | $-2 \times 10^{-3}$ ( $-3 \times 10^{-3}$ , $-2 \times 10^{-3}$ ) $p=6 \times 10^{-10}$ | $-2 \times 10^{-3}$ ( $-3 \times 10^{-3}$ , $-1 \times 10^{-3}$ ) $p=2 \times 10^{-6}$   | 0.36       |
| Triglycerides (mmol/l)                              | $-2 \times 10^{-4}$ ( $-5 \times 10^{-4}$ , $1 \times 10^{-4}$ ) $p=0.26$               | $-2 \times 10^{-4}$ ( $-5 \times 10^{-4}$ , $7 \times 10^{-5}$ ) $p=0.13$                | 0.76       |
| <b>Medium HDL</b>                                   |                                                                                         |                                                                                          |            |
| Particle concentration (mol/l)                      | $-2 \times 10^{-9}$ ( $-1 \times 10^{-8}$ , $7 \times 10^{-9}$ ) $p=0.73$               | $5 \times 10^{-9}$ ( $-4 \times 10^{-9}$ , $1 \times 10^{-8}$ ) $p=0.25$                 | 0.27       |
| Total lipids (mmol/l)                               | $-1 \times 10^{-3}$ (-0.01, $3 \times 10^{-3}$ ) $p=0.52$                               | $2 \times 10^{-3}$ ( $-2 \times 10^{-3}$ , 0.01) $p=0.34$                                | 0.23       |
| Phospholipids (mmol/l)                              | $-1 \times 10^{-3}$ ( $-3 \times 10^{-3}$ , $7 \times 10^{-4}$ ) $p=0.25$               | $8 \times 10^{-4}$ ( $-1 \times 10^{-3}$ , $3 \times 10^{-3}$ ) $p=0.40$                 | 0.14       |
| Total cholesterol (mmol/l)                          | $-9.9 \times 10^{-4}$ ( $-3 \times 10^{-3}$ , $1 \times 10^{-3}$ ) $p=0.38$             | $6 \times 10^{-4}$ ( $-2 \times 10^{-3}$ , $3 \times 10^{-3}$ ) $p=0.57$                 | 0.28       |
| Cholesterol esters (mmol/l)                         | $-8 \times 10^{-4}$ ( $-3 \times 10^{-3}$ , $9.9 \times 10^{-4}$ ) $p=0.39$             | $5 \times 10^{-4}$ ( $-1 \times 10^{-3}$ , $2 \times 10^{-3}$ ) $p=0.58$                 | 0.29       |
| Free cholesterol (mmol/l)                           | $-2 \times 10^{-4}$ ( $-6 \times 10^{-4}$ , $2 \times 10^{-4}$ ) $p=0.38$               | $1 \times 10^{-4}$ ( $-3 \times 10^{-4}$ , $6 \times 10^{-4}$ ) $p=0.55$                 | 0.28       |
| Triglycerides (mmol/l)                              | $7 \times 10^{-4}$ ( $4 \times 10^{-4}$ , $1 \times 10^{-3}$ ) $p=3 \times 10^{-6}$     | $6 \times 10^{-4}$ ( $3 \times 10^{-4}$ , $9 \times 10^{-4}$ ) $p=4 \times 10^{-4}$      | 0.42       |
| <b>Small HDL</b>                                    |                                                                                         |                                                                                          |            |

S3 Table. One-stage individual participant data (IPD) meta-analysis: offspring lipoproteins, lipids and metabolites absolute concentration differences per 1-SD higher parental BMI.

| One stage-Individual Participant Data meta-analysis |                                                                                     |                                                                                     |                    |
|-----------------------------------------------------|-------------------------------------------------------------------------------------|-------------------------------------------------------------------------------------|--------------------|
| Metabolites                                         | mother                                                                              | father                                                                              | $P_{boot}$         |
| Particle concentration (mol/l)                      | $1 \times 10^{-8}$ ( $9 \times 10^{-10}$ , $3 \times 10^{-8}$ ) $p=0.04$            | $3 \times 10^{-8}$ ( $1 \times 10^{-8}$ , $4 \times 10^{-8}$ ) $p=1 \times 10^{-4}$ | 0.15               |
| Total lipids (mmol/l)                               | $2 \times 10^{-3}$ ( $-9.8 \times 10^{-4}$ , 0.01) $p=0.18$                         | 0.01 ( $3 \times 10^{-3}$ , 0.01) $p=4 \times 10^{-4}$                              | 0.07               |
| Phospholipids (mmol/l)                              | $2 \times 10^{-3}$ ( $-2 \times 10^{-4}$ , $3 \times 10^{-3}$ ) $p=0.08$            | $3 \times 10^{-3}$ ( $1 \times 10^{-3}$ , 0.01) $p=5 \times 10^{-4}$                | 0.16               |
| Total cholesterol (mmol/l)                          | $5 \times 10^{-5}$ ( $-2 \times 10^{-3}$ , $2 \times 10^{-3}$ ) $p=0.96$            | $2 \times 10^{-3}$ ( $4 \times 10^{-4}$ , $4 \times 10^{-3}$ ) $p=0.02$             | 0.07               |
| Cholesterol esters (mmol/l)                         | $2 \times 10^{-4}$ ( $-1 \times 10^{-3}$ , $2 \times 10^{-3}$ ) $p=0.82$            | $2 \times 10^{-3}$ ( $2 \times 10^{-4}$ , $3 \times 10^{-3}$ ) $p=0.03$             | 0.12               |
| Free cholesterol (mmol/l)                           | $-1 \times 10^{-4}$ ( $-5 \times 10^{-4}$ , $3 \times 10^{-4}$ ) $p=0.56$           | $4 \times 10^{-4}$ ( $2 \times 10^{-5}$ , $8 \times 10^{-4}$ ) $p=0.04$             | 0.04               |
| Triglycerides (mmol/l)                              | $5 \times 10^{-4}$ ( $2 \times 10^{-4}$ , $8 \times 10^{-4}$ ) $p=3 \times 10^{-4}$ | $6 \times 10^{-4}$ ( $3 \times 10^{-4}$ , $9 \times 10^{-4}$ ) $p=7 \times 10^{-5}$ | 0.70               |
| <b>Lipoprotein particle size</b>                    |                                                                                     |                                                                                     |                    |
| VLDL particle size (nm)                             | 0.08 (0.04, 0.11) $p=4 \times 10^{-6}$                                              | 0.06 (0.03, 0.10) $p=8 \times 10^{-5}$                                              | 0.61               |
| LDL particle size (nm)                              | $-3 \times 10^{-3}$ (-0.01, $8 \times 10^{-4}$ ) $p=0.13$                           | $-3 \times 10^{-3}$ (-0.01, $4 \times 10^{-4}$ ) $p=0.08$                           | 0.79               |
| HDL particle size (nm)                              | -0.02 (-0.02, -0.01) $p=3 \times 10^{-11}$                                          | -0.02 (-0.02, -0.01) $p=9 \times 10^{-10}$                                          | 0.87               |
| <b>Cholesterol</b>                                  |                                                                                     |                                                                                     |                    |
| Total cholesterol (mmol/l)                          | 0.01 (-0.01, 0.03) $p=0.54$                                                         | $5 \times 10^{-3}$ (-0.02, 0.02) $p=0.66$                                           | 0.91               |
| VLDL cholesterol (mmol/l)                           | 0.01 (0.01, 0.02) $p=3 \times 10^{-6}$                                              | 0.01 ( $4 \times 10^{-3}$ , 0.01) $p=5 \times 10^{-4}$                              | 0.37               |
| Remnant cholesterol (mmol/l)                        | 0.02 (0.01, 0.02) $p=2 \times 10^{-4}$                                              | 0.01 ( $2 \times 10^{-3}$ , 0.02) $p=0.02$                                          | 0.33               |
| LDL cholesterol (mmol/l)                            | 0.01 ( $-3 \times 10^{-3}$ , 0.02) $p=0.15$                                         | $5 \times 10^{-3}$ (-0.01, 0.02) $p=0.38$                                           | 0.70               |
| HDL cholesterol (mmol/l)                            | -0.02 (-0.02, -0.01) $p=1 \times 10^{-7}$                                           | -0.01 (-0.02, $-4 \times 10^{-3}$ ) $p=2 \times 10^{-3}$                            | 0.16               |
| HDL <sub>2</sub> cholesterol (mmol/l)               | -0.01 (-0.02, -0.01) $p=9 \times 10^{-7}$                                           | -0.01 (-0.01, $-4 \times 10^{-3}$ ) $p=1 \times 10^{-3}$                            | 0.25               |
| HDL <sub>3</sub> cholesterol (mmol/l)               | $-4 \times 10^{-3}$ (-0.01, $-2 \times 10^{-3}$ ) $p=2 \times 10^{-6}$              | $-2 \times 10^{-3}$ ( $-3 \times 10^{-3}$ , $8 \times 10^{-5}$ ) $p=0.06$           | 0.06               |
| Esterified cholesterol (mmol/l)                     | $4 \times 10^{-3}$ (-0.01, 0.02) $p=0.56$                                           | $3 \times 10^{-3}$ (-0.01, 0.02) $p=0.69$                                           | 0.90               |
| Free cholesterol (mmol/l)                           | $2 \times 10^{-3}$ ( $-4 \times 10^{-3}$ , 0.01) $p=0.51$                           | $2 \times 10^{-3}$ ( $-4 \times 10^{-3}$ , 0.01) $p=0.57$                           | 0.96               |
| <b>Glycerides and phospholipids</b>                 |                                                                                     |                                                                                     |                    |
| Triglycerides (mmol/l)                              | 0.02 (0.01, 0.03) $p=8 \times 10^{-6}$                                              | 0.02 (0.01, 0.03) $p=4 \times 10^{-5}$                                              | 0.82               |
| VLDL triglycerides (mmol/l)                         | 0.02 (0.01, 0.03) $p=7 \times 10^{-7}$                                              | 0.02 (0.01, 0.03) $p=9 \times 10^{-6}$                                              | 0.70               |
| LDL triglycerides (mmol/l)                          | $-7 \times 10^{-5}$ ( $-1 \times 10^{-3}$ , $1 \times 10^{-3}$ ) $p=0.90$           | $6 \times 10^{-4}$ ( $-6 \times 10^{-4}$ , $2 \times 10^{-3}$ ) $p=0.34$            | 0.41               |
| HDL triglycerides (mmol/l)                          | $9.5 \times 10^{-4}$ ( $2 \times 10^{-4}$ , $2 \times 10^{-3}$ ) $p=0.02$           | $7 \times 10^{-4}$ ( $-7 \times 10^{-5}$ , $2 \times 10^{-3}$ ) $p=0.07$            | 0.70               |
| Phosphoglycerides (mmol/l)                          | $-3 \times 10^{-3}$ (-0.01, 0.01) $p=0.49$                                          | $2 \times 10^{-3}$ (-0.01, 0.01) $p=0.57$                                           | 0.37               |
| Phosphatidylcholine + other cholines (mmol/l)       | $-4 \times 10^{-3}$ (-0.01, $4 \times 10^{-3}$ ) $p=0.36$                           | $4 \times 10^{-3}$ ( $-5 \times 10^{-3}$ , 0.01) $p=0.41$                           | 0.18               |
| Cholines (mmol/l)                                   | $-4 \times 10^{-3}$ (-0.01, $4 \times 10^{-3}$ ) $p=0.32$                           | $1 \times 10^{-3}$ (-0.01, 0.01) $p=0.82$                                           | 0.40               |
| <b>Apolipoproteins</b>                              |                                                                                     |                                                                                     |                    |
| Apolipoprotein A-I (g/l)                            | -0.01 (-0.01, $-3 \times 10^{-3}$ ) $p=2 \times 10^{-3}$                            | $-3 \times 10^{-3}$ (-0.01, $1 \times 10^{-3}$ ) $p=0.15$                           | 0.23               |
| Apolipoprotein B (g/l)                              | 0.01 ( $4 \times 10^{-3}$ , 0.01) $p=8 \times 10^{-5}$                              | 0.01 ( $2 \times 10^{-3}$ , 0.01) $p=4 \times 10^{-3}$                              | 0.44               |
| <b>Fatty acids</b>                                  |                                                                                     |                                                                                     |                    |
| Total fatty acids (mmol/l)                          | 0.05 ( $2 \times 10^{-3}$ , 0.10) $p=0.04$                                          | 0.06 (0.01, 0.11) $p=0.02$                                                          | 0.81               |
| Degree of unsaturation                              | $-1 \times 10^{-3}$ ( $-3 \times 10^{-3}$ , $4 \times 10^{-4}$ ) $p=0.14$           | $-3 \times 10^{-4}$ ( $-2 \times 10^{-3}$ , $1 \times 10^{-3}$ ) $p=0.74$           | 0.39               |
| Docosahexaenoic acid (mmol/l)                       | $-8 \times 10^{-4}$ ( $-2 \times 10^{-3}$ , $2 \times 10^{-4}$ ) $p=0.11$           | $9.8 \times 10^{-4}$ ( $-1 \times 10^{-4}$ , $2 \times 10^{-3}$ ) $p=0.08$          | 0.01               |
| Linoleic acid (mmol/l)                              | $3 \times 10^{-3}$ (-0.01, 0.02) $p=0.57$                                           | $3 \times 10^{-3}$ (-0.01, 0.02) $p=0.62$                                           | 0.97               |
| n-3 fatty acids (mmol/l)                            | $-2 \times 10^{-4}$ ( $-3 \times 10^{-3}$ , $2 \times 10^{-3}$ ) $p=0.90$           | $3 \times 10^{-3}$ ( $3 \times 10^{-5}$ , 0.01) $p=0.05$                            | 0.12               |
| n-6 fatty acids (mmol/l)                            | $5 \times 10^{-3}$ (-0.01, 0.02) $p=0.53$                                           | 0.01 (-0.01, 0.02) $p=0.42$                                                         | 0.87               |
| PUFA (mmol/l)                                       | $4 \times 10^{-3}$ (-0.01, 0.02) $p=0.61$                                           | 0.01 (-0.01, 0.03) $p=0.31$                                                         | 0.68               |
| MUFA (mmol/l)                                       | 0.03 (0.01, 0.05) $p=4 \times 10^{-4}$                                              | 0.03 (0.01, 0.05) $p=4 \times 10^{-4}$                                              | 0.85               |
| Saturated fatty acids (mmol/l)                      | 0.01 (-0.01, 0.03) $p=0.17$                                                         | 0.02 ( $-5 \times 10^{-3}$ , 0.03) $p=0.13$                                         | 0.90               |
| <b>Fatty acids ratios</b>                           |                                                                                     |                                                                                     |                    |
| Docosahexaenoic acid (%)                            | -0.01 (-0.02, -0.01) $p=2 \times 10^{-4}$                                           | $2 \times 10^{-3}$ (-0.01, 0.01) $p=0.66$                                           | $3 \times 10^{-3}$ |
| Linoleic acid (%)                                   | -0.08 (-0.14, -0.02) $p=0.01$                                                       | -0.11 (-0.18, -0.04) $p=1 \times 10^{-3}$                                           | 0.50               |
| n-3 fatty acids (%)                                 | -0.02 (-0.04, $-3 \times 10^{-3}$ ) $p=0.02$                                        | 0.01 (-0.01, 0.02) $p=0.60$                                                         | 0.04               |
| n-6 fatty acids (%)                                 | -0.10 (-0.16, -0.03) $p=3 \times 10^{-3}$                                           | -0.11 (-0.18, -0.05) $p=8 \times 10^{-4}$                                           | 0.70               |
| PUFA (%)                                            | -0.12 (-0.19, -0.05) $p=8 \times 10^{-4}$                                           | -0.11 (-0.18, -0.04) $p=3 \times 10^{-3}$                                           | 0.82               |
| MUFA (%)                                            | 0.17 (0.10, 0.25) $p=7 \times 10^{-6}$                                              | 0.18 (0.10, 0.25) $p=1 \times 10^{-5}$                                              | 0.99               |
| Saturated fatty acids (%)                           | -0.05 (-0.11, $4 \times 10^{-3}$ ) $p=0.07$                                         | -0.07 (-0.12, -0.01) $p=0.03$                                                       | 0.74               |
| <b>Glycolysis related metabolites</b>               |                                                                                     |                                                                                     |                    |
| Glucose (mmol/l)                                    | 0.01 ( $-5 \times 10^{-3}$ , 0.02) $p=0.23$                                         | 0.01 ( $-5 \times 10^{-3}$ , 0.02) $p=0.19$                                         | 0.83               |
| Lactate (mmol/l)                                    | $2 \times 10^{-3}$ (-0.01, 0.01) $p=0.76$                                           | -0.01 (-0.02, $4 \times 10^{-3}$ ) $p=0.18$                                         | 0.19               |

S3 Table. One-stage individual participant data (IPD) meta-analysis: offspring lipoproteins, lipids and metabolites absolute concentration differences per 1-SD higher parental BMI.

| One stage-Individual Participant Data meta-analysis |                                                                                          |                                                                                        |            |
|-----------------------------------------------------|------------------------------------------------------------------------------------------|----------------------------------------------------------------------------------------|------------|
| Metabolites                                         | mother                                                                                   | father                                                                                 | $P_{boot}$ |
| Pyruvate (mmol/l)                                   | $1 \times 10^{-3}$ ( $4 \times 10^{-4}$ , $2 \times 10^{-3}$ ) $p=4 \times 10^{-3}$      | $3 \times 10^{-4}$ ( $-5 \times 10^{-4}$ , $1 \times 10^{-3}$ ) $p=0.45$               | 0.12       |
| Citrate (mmol/l)                                    | $-9.7 \times 10^{-4}$ ( $-2 \times 10^{-3}$ , $-4 \times 10^{-4}$ ) $p=1 \times 10^{-3}$ | $-1 \times 10^{-3}$ ( $-2 \times 10^{-3}$ , $-6 \times 10^{-4}$ ) $p=7 \times 10^{-5}$ | 0.51       |
| <b>Amino acids</b>                                  |                                                                                          |                                                                                        |            |
| Alanine (mmol/l)                                    | $2 \times 10^{-4}$ ( $-1 \times 10^{-3}$ , $2 \times 10^{-3}$ ) $p=0.77$                 | $-3 \times 10^{-4}$ ( $-2 \times 10^{-3}$ , $1 \times 10^{-3}$ ) $p=0.71$              | 0.61       |
| Glutamine (mmol/l)                                  | $-6 \times 10^{-4}$ ( $-2 \times 10^{-3}$ , $1 \times 10^{-3}$ ) $p=0.54$                | $-3 \times 10^{-3}$ ( $-4 \times 10^{-3}$ , $-9 \times 10^{-4}$ ) $p=4 \times 10^{-3}$ | 0.08       |
| Histidine (mmol/l)                                  | $3 \times 10^{-4}$ ( $-3 \times 10^{-5}$ , $6 \times 10^{-4}$ ) $p=0.08$                 | $3 \times 10^{-4}$ ( $1 \times 10^{-5}$ , $7 \times 10^{-4}$ ) $p=0.04$                | 0.77       |
| <b>Branched-chain amino acids</b>                   |                                                                                          |                                                                                        |            |
| Isoleucine (mmol/l)                                 | $8 \times 10^{-4}$ ( $4 \times 10^{-4}$ , $1 \times 10^{-3}$ ) $p=9 \times 10^{-6}$      | $7 \times 10^{-4}$ ( $4 \times 10^{-4}$ , $1 \times 10^{-3}$ ) $p=3 \times 10^{-5}$    | 0.83       |
| Leucine (mmol/l)                                    | $5 \times 10^{-4}$ ( $2 \times 10^{-4}$ , $8 \times 10^{-4}$ ) $p=2 \times 10^{-3}$      | $8 \times 10^{-4}$ ( $4 \times 10^{-4}$ , $1 \times 10^{-3}$ ) $p=9 \times 10^{-6}$    | 0.24       |
| Valine (mmol/l)                                     | $1 \times 10^{-3}$ ( $6 \times 10^{-4}$ , $2 \times 10^{-3}$ ) $p=9.8 \times 10^{-4}$    | $2 \times 10^{-3}$ ( $9.5 \times 10^{-4}$ , $3 \times 10^{-3}$ ) $p=4 \times 10^{-5}$  | 0.50       |
| <b>Aromatic amino acids</b>                         |                                                                                          |                                                                                        |            |
| Phenylalanine (mmol/l)                              | $5 \times 10^{-4}$ ( $3 \times 10^{-4}$ , $7 \times 10^{-4}$ ) $p=9 \times 10^{-6}$      | $3 \times 10^{-4}$ ( $1 \times 10^{-4}$ , $6 \times 10^{-4}$ ) $p=3 \times 10^{-3}$    | 0.29       |
| Tyrosine (mmol/l)                                   | $5 \times 10^{-4}$ ( $2 \times 10^{-4}$ , $8 \times 10^{-4}$ ) $p=2 \times 10^{-3}$      | $4 \times 10^{-4}$ ( $8 \times 10^{-5}$ , $7 \times 10^{-4}$ ) $p=0.01$                | 0.65       |
| <b>Ketone bodies</b>                                |                                                                                          |                                                                                        |            |
| Acetate (mmol/l)                                    | $-8 \times 10^{-4}$ ( $-1 \times 10^{-3}$ , $-3 \times 10^{-4}$ ) $p=2 \times 10^{-3}$   | $-5 \times 10^{-4}$ ( $-10 \times 10^{-4}$ , $5 \times 10^{-5}$ ) $p=0.07$             | 0.25       |
| Acetoacetate (mmol/l)                               | $4 \times 10^{-4}$ ( $-9.6 \times 10^{-4}$ , $2 \times 10^{-3}$ ) $p=0.55$               | $4 \times 10^{-4}$ ( $-8 \times 10^{-4}$ , $2 \times 10^{-3}$ ) $p=0.51$               | 0.97       |
| Beta-hydroxybutyrate (mmol/l)                       | $-2 \times 10^{-3}$ ( $-0.01$ , $5 \times 10^{-4}$ ) $p=0.11$                            | $-5 \times 10^{-4}$ ( $-4 \times 10^{-3}$ , $3 \times 10^{-3}$ ) $p=0.73$              | 0.37       |
| <b>Fluid balance</b>                                |                                                                                          |                                                                                        |            |
| Creatinine (mmol/l)                                 | $3 \times 10^{-4}$ ( $6 \times 10^{-5}$ , $6 \times 10^{-4}$ ) $p=0.01$                  | $5 \times 10^{-4}$ ( $2 \times 10^{-4}$ , $7 \times 10^{-4}$ ) $p=2 \times 10^{-4}$    | 0.32       |
| Albumin (signal area)                               | $6 \times 10^{-5}$ ( $-2 \times 10^{-4}$ , $3 \times 10^{-4}$ ) $p=0.62$                 | $5 \times 10^{-5}$ ( $-2 \times 10^{-4}$ , $3 \times 10^{-4}$ ) $p=0.69$               | 0.94       |
| <b>Inflammation</b>                                 |                                                                                          |                                                                                        |            |
| Glycoprotein acetyls (mmol/l)                       | 0.01 (0.01, 0.02) $p=8 \times 10^{-7}$                                                   | 0.01 (0.01, 0.02) $p=2 \times 10^{-5}$                                                 | 0.51       |

Associations were adjusted for parental age, smoking, education, head of household social class, maternal parity, offspring's age at blood collection, sex and cohort membership. Categorical variables were harmonized across the three cohorts (see S1 Table). S3 Table correspond to the SD-scaled metabolite concentration shown in Fig 2.
