# Supplementary material for: Association of pre-pregnancy body mass index with offspring metabolic profile: Analyses of 3 European prospective birth cohorts
Source: PubMed Central journal article supplement (PMC5568725; doi:10.1371/journal.pmed.1002376), 2017-08-22
Supplement: pmed.1002376.s011.pdf [file pmed.1002376.s011.pdf]

S4 Table. Two-stage IPD meta-analysis: offspring lipoproteins, lipids and metabolites absolute concentration differences per 1-SD higher parental BMI.

| Two stage-Individual Participant Data meta-analysis |                                                                                        |                |                                                                                        |                |  |
|-----------------------------------------------------|----------------------------------------------------------------------------------------|----------------|----------------------------------------------------------------------------------------|----------------|--|
| Metabolites                                         | mother                                                                                 | $I^2_{mother}$ | father                                                                                 | $I^2_{father}$ |  |
| <b>Lipoprotein subclasses</b>                       |                                                                                        |                |                                                                                        |                |  |
| <b>Extremely large VLDL</b>                         |                                                                                        |                |                                                                                        |                |  |
| Particle concentration (mol/l)                      | $6 \times 10^{-12}$ ( $3 \times 10^{-12}$ , $8 \times 10^{-12}$ ) $p=4 \times 10^{-7}$ | 10             | $4 \times 10^{-12}$ ( $1 \times 10^{-12}$ , $6 \times 10^{-12}$ ) $p=3 \times 10^{-3}$ | 17             |  |
| Total lipids (mmol/l)                               | $1 \times 10^{-3}$ ( $7 \times 10^{-4}$ , $2 \times 10^{-3}$ ) $p=2 \times 10^{-6}$    | 14             | $8 \times 10^{-4}$ ( $2 \times 10^{-4}$ , $1 \times 10^{-3}$ ) $p=0.00$                | 20             |  |
| Phospholipids (mmol/l)                              | $1 \times 10^{-4}$ ( $8 \times 10^{-5}$ , $2 \times 10^{-4}$ ) $p=2 \times 10^{-6}$    | 9              | $1 \times 10^{-4}$ ( $4 \times 10^{-5}$ , $2 \times 10^{-4}$ ) $p=1 \times 10^{-3}$    | 0              |  |
| Total cholesterol (mmol/l)                          | $2 \times 10^{-4}$ ( $1 \times 10^{-4}$ , $3 \times 10^{-4}$ ) $p=2 \times 10^{-7}$    | 5              | $2 \times 10^{-4}$ ( $4 \times 10^{-5}$ , $3 \times 10^{-4}$ ) $p=0.01$                | 30             |  |
| Cholesterol esters (mmol/l)                         | $1 \times 10^{-4}$ ( $9 \times 10^{-5}$ , $2 \times 10^{-4}$ ) $p=4 \times 10^{-8}$    | 0              | $8 \times 10^{-5}$ ( $1 \times 10^{-5}$ , $2 \times 10^{-4}$ ) $p=0.02$                | 42             |  |
| Free cholesterol (mmol/l)                           | $9 \times 10^{-5}$ ( $5 \times 10^{-5}$ , $1 \times 10^{-4}$ ) $p=3 \times 10^{-6}$    | 14             | $7 \times 10^{-5}$ ( $3 \times 10^{-5}$ , $1 \times 10^{-4}$ ) $p=9.9 \times 10^{-4}$  | 0              |  |
| Triglycerides (mmol/l)                              | $8 \times 10^{-4}$ ( $5 \times 10^{-4}$ , $1 \times 10^{-3}$ ) $p=3 \times 10^{-6}$    | 17             | $6 \times 10^{-4}$ ( $2 \times 10^{-4}$ , $9.5 \times 10^{-4}$ ) $p=0.01$              | 21             |  |
| <b>Very large VLDL</b>                              |                                                                                        |                |                                                                                        |                |  |
| Particle concentration (mol/l)                      | $3 \times 10^{-11}$ ( $2 \times 10^{-11}$ , $4 \times 10^{-11}$ ) $p=1 \times 10^{-7}$ | 0              | $3 \times 10^{-11}$ ( $1 \times 10^{-11}$ , $4 \times 10^{-11}$ ) $p=1 \times 10^{-4}$ | 0              |  |
| Total lipids (mmol/l)                               | $3 \times 10^{-3}$ ( $2 \times 10^{-3}$ , $4 \times 10^{-3}$ ) $p=1 \times 10^{-7}$    | 0              | $2 \times 10^{-3}$ ( $1 \times 10^{-3}$ , $4 \times 10^{-3}$ ) $p=1 \times 10^{-4}$    | 0              |  |
| Phospholipids (mmol/l)                              | $5 \times 10^{-4}$ ( $3 \times 10^{-4}$ , $7 \times 10^{-4}$ ) $p=1 \times 10^{-7}$    | 0              | $4 \times 10^{-4}$ ( $2 \times 10^{-4}$ , $6 \times 10^{-4}$ ) $p=1 \times 10^{-4}$    | 0              |  |
| Total cholesterol (mmol/l)                          | $7 \times 10^{-4}$ ( $4 \times 10^{-4}$ , $9 \times 10^{-4}$ ) $p=3 \times 10^{-7}$    | 9              | $5 \times 10^{-4}$ ( $2 \times 10^{-4}$ , $7 \times 10^{-4}$ ) $p=5 \times 10^{-4}$    | 1              |  |
| Cholesterol esters (mmol/l)                         | $4 \times 10^{-4}$ ( $2 \times 10^{-4}$ , $5 \times 10^{-4}$ ) $p=1 \times 10^{-6}$    | 19             | $2 \times 10^{-4}$ ( $8 \times 10^{-5}$ , $4 \times 10^{-4}$ ) $p=4 \times 10^{-3}$    | 26             |  |
| Free cholesterol (mmol/l)                           | $3 \times 10^{-4}$ ( $2 \times 10^{-4}$ , $4 \times 10^{-4}$ ) $p=1 \times 10^{-7}$    | 0              | $2 \times 10^{-4}$ ( $1 \times 10^{-4}$ , $4 \times 10^{-4}$ ) $p=4 \times 10^{-4}$    | 0              |  |
| Triglycerides (mmol/l)                              | $2 \times 10^{-3}$ ( $1 \times 10^{-3}$ , $3 \times 10^{-3}$ ) $p=2 \times 10^{-7}$    | 0              | $2 \times 10^{-3}$ ( $8 \times 10^{-4}$ , $2 \times 10^{-3}$ ) $p=8 \times 10^{-5}$    | 0              |  |
| <b>Large VLDL</b>                                   |                                                                                        |                |                                                                                        |                |  |
| Particle concentration (mol/l)                      | $2 \times 10^{-10}$ ( $1 \times 10^{-10}$ , $2 \times 10^{-10}$ ) $p=1 \times 10^{-7}$ | 0              | $1 \times 10^{-10}$ ( $8 \times 10^{-11}$ , $2 \times 10^{-10}$ ) $p=2 \times 10^{-5}$ | 0              |  |
| Total lipids (mmol/l)                               | 0.01 (0.01, 0.01) $p=9 \times 10^{-8}$                                                 | 0              | 0.01 ( $5 \times 10^{-3}$ , 0.01) $p=2 \times 10^{-5}$                                 | 0              |  |
| Phospholipids (mmol/l)                              | $2 \times 10^{-3}$ ( $1 \times 10^{-3}$ , $2 \times 10^{-3}$ ) $p=9 \times 10^{-8}$    | 0              | $2 \times 10^{-3}$ ( $8 \times 10^{-4}$ , $2 \times 10^{-3}$ ) $p=2 \times 10^{-5}$    | 0              |  |
| Total cholesterol (mmol/l)                          | $2 \times 10^{-3}$ ( $2 \times 10^{-3}$ , $3 \times 10^{-3}$ ) $p=3 \times 10^{-8}$    | 0              | $2 \times 10^{-3}$ ( $9 \times 10^{-4}$ , $3 \times 10^{-3}$ ) $p=2 \times 10^{-4}$    | 9              |  |
| Cholesterol esters (mmol/l)                         | $1 \times 10^{-3}$ ( $8 \times 10^{-4}$ , $2 \times 10^{-3}$ ) $p=1 \times 10^{-8}$    | 0              | $9 \times 10^{-4}$ ( $3 \times 10^{-4}$ , $1 \times 10^{-3}$ ) $p=3 \times 10^{-3}$    | 32             |  |
| Free cholesterol (mmol/l)                           | $1 \times 10^{-3}$ ( $7 \times 10^{-4}$ , $2 \times 10^{-3}$ ) $p=1 \times 10^{-7}$    | 0              | $9.8 \times 10^{-4}$ ( $5 \times 10^{-4}$ , $1 \times 10^{-3}$ ) $p=4 \times 10^{-5}$  | 0              |  |
| Triglycerides (mmol/l)                              | 0.01 ( $3 \times 10^{-3}$ , 0.01) $p=2 \times 10^{-7}$                                 | 0              | 0.01 ( $3 \times 10^{-3}$ , 0.01) $p=1 \times 10^{-5}$                                 | 0              |  |
| <b>Medium VLDL</b>                                  |                                                                                        |                |                                                                                        |                |  |
| Particle concentration (mol/l)                      | $4 \times 10^{-10}$ ( $3 \times 10^{-10}$ , $6 \times 10^{-10}$ ) $p=3 \times 10^{-8}$ | 0              | $4 \times 10^{-10}$ ( $2 \times 10^{-10}$ , $5 \times 10^{-10}$ ) $p=7 \times 10^{-6}$ | 0              |  |
| Total lipids (mmol/l)                               | 0.01 (0.01, 0.02) $p=3 \times 10^{-8}$                                                 | 0              | 0.01 (0.01, 0.02) $p=9 \times 10^{-6}$                                                 | 0              |  |
| Phospholipids (mmol/l)                              | $3 \times 10^{-3}$ ( $2 \times 10^{-3}$ , $4 \times 10^{-3}$ ) $p=5 \times 10^{-8}$    | 0              | $2 \times 10^{-3}$ ( $1 \times 10^{-3}$ , $3 \times 10^{-3}$ ) $p=1 \times 10^{-5}$    | 0              |  |
| Total cholesterol (mmol/l)                          | $4 \times 10^{-3}$ ( $2 \times 10^{-3}$ , 0.01) $p=4 \times 10^{-8}$                   | 0              | $3 \times 10^{-3}$ ( $2 \times 10^{-3}$ , $5 \times 10^{-3}$ ) $p=8 \times 10^{-5}$    | 0              |  |
| Cholesterol esters (mmol/l)                         | $2 \times 10^{-3}$ ( $1 \times 10^{-3}$ , $3 \times 10^{-3}$ ) $p=3 \times 10^{-8}$    | 0              | $2 \times 10^{-3}$ ( $6 \times 10^{-4}$ , $3 \times 10^{-3}$ ) $p=1 \times 10^{-3}$    | 17             |  |
| Free cholesterol (mmol/l)                           | $2 \times 10^{-3}$ ( $1 \times 10^{-3}$ , $2 \times 10^{-3}$ ) $p=2 \times 10^{-7}$    | 0              | $2 \times 10^{-3}$ ( $8 \times 10^{-4}$ , $2 \times 10^{-3}$ ) $p=2 \times 10^{-5}$    | 0              |  |
| Triglycerides (mmol/l)                              | 0.01 ( $5 \times 10^{-3}$ , 0.01) $p=5 \times 10^{-8}$                                 | 0              | 0.01 ( $4 \times 10^{-3}$ , 0.01) $p=4 \times 10^{-6}$                                 | 0              |  |
| <b>Small VLDL</b>                                   |                                                                                        |                |                                                                                        |                |  |
| Particle concentration (mol/l)                      | $4 \times 10^{-10}$ ( $3 \times 10^{-10}$ , $6 \times 10^{-10}$ ) $p=1 \times 10^{-7}$ | 0              | $4 \times 10^{-10}$ ( $2 \times 10^{-10}$ , $6 \times 10^{-10}$ ) $p=1 \times 10^{-5}$ | 0              |  |
| Total lipids (mmol/l)                               | 0.01 (0.01, 0.01) $p=2 \times 10^{-7}$                                                 | 0              | 0.01 ( $4 \times 10^{-3}$ , 0.01) $p=3 \times 10^{-5}$                                 | 0              |  |
| Phospholipids (mmol/l)                              | $2 \times 10^{-3}$ ( $1 \times 10^{-3}$ , $3 \times 10^{-3}$ ) $p=4 \times 10^{-7}$    | 0              | $2 \times 10^{-3}$ ( $9.9 \times 10^{-4}$ , $3 \times 10^{-3}$ ) $p=1 \times 10^{-5}$  | 0              |  |
| Total cholesterol (mmol/l)                          | $3 \times 10^{-3}$ ( $2 \times 10^{-3}$ , $5 \times 10^{-3}$ ) $p=1 \times 10^{-6}$    | 0              | $3 \times 10^{-3}$ ( $1 \times 10^{-3}$ , $4 \times 10^{-3}$ ) $p=1 \times 10^{-3}$    | 0              |  |
| Cholesterol esters (mmol/l)                         | $2 \times 10^{-3}$ ( $1 \times 10^{-3}$ , $3 \times 10^{-3}$ ) $p=2 \times 10^{-6}$    | 0              | $1 \times 10^{-3}$ ( $4 \times 10^{-4}$ , $3 \times 10^{-3}$ ) $p=0.01$                | 0              |  |
| Free cholesterol (mmol/l)                           | $1 \times 10^{-3}$ ( $6 \times 10^{-4}$ , $2 \times 10^{-3}$ ) $p=4 \times 10^{-6}$    | 0              | $1 \times 10^{-3}$ ( $6 \times 10^{-4}$ , $2 \times 10^{-3}$ ) $p=7 \times 10^{-5}$    | 0              |  |
| Triglycerides (mmol/l)                              | $4 \times 10^{-3}$ ( $2 \times 10^{-3}$ , 0.01) $p=4 \times 10^{-7}$                   | 0              | $4 \times 10^{-3}$ ( $2 \times 10^{-3}$ , 0.01) $p=9 \times 10^{-6}$                   | 0              |  |
| <b>Very Small VLDL</b>                              |                                                                                        |                |                                                                                        |                |  |
| Particle concentration (mol/l)                      | $3 \times 10^{-10}$ ( $9 \times 10^{-11}$ , $4 \times 10^{-10}$ ) $p=2 \times 10^{-3}$ | 0              | $2 \times 10^{-10}$ ( $3 \times 10^{-11}$ , $4 \times 10^{-10}$ ) $p=0.02$             | 0              |  |
| Total lipids (mmol/l)                               | $4 \times 10^{-3}$ ( $2 \times 10^{-3}$ , 0.01) $p=6 \times 10^{-4}$                   | 0              | $3 \times 10^{-3}$ ( $-3 \times 10^{-6}$ , 0.01) $p=0.05$                              | 0              |  |
| Phospholipids (mmol/l)                              | $9 \times 10^{-4}$ ( $2 \times 10^{-4}$ , $2 \times 10^{-3}$ ) $p=0.01$                | 0              | $6 \times 10^{-4}$ ( $-2 \times 10^{-4}$ , $1 \times 10^{-3}$ ) $p=0.16$               | 0              |  |
| Total cholesterol (mmol/l)                          | $2 \times 10^{-3}$ ( $9 \times 10^{-4}$ , $3 \times 10^{-3}$ ) $p=9 \times 10^{-4}$    | 0              | $9 \times 10^{-4}$ ( $-6 \times 10^{-4}$ , $2 \times 10^{-3}$ ) $p=0.22$               | 0              |  |
| Cholesterol esters (mmol/l)                         | $2 \times 10^{-3}$ ( $9 \times 10^{-4}$ , $3 \times 10^{-3}$ ) $p=1 \times 10^{-4}$    | 0              | $7 \times 10^{-4}$ ( $-4 \times 10^{-4}$ , $2 \times 10^{-3}$ ) $p=0.22$               | 0              |  |
| Free cholesterol (mmol/l)                           | $4 \times 10^{-4}$ ( $-2 \times 10^{-5}$ , $8 \times 10^{-4}$ ) $p=0.07$               | 0              | $3 \times 10^{-4}$ ( $-2 \times 10^{-4}$ , $7 \times 10^{-4}$ ) $p=0.27$               | 0              |  |
| Triglycerides (mmol/l)                              | $9.9 \times 10^{-4}$ ( $4 \times 10^{-4}$ , $2 \times 10^{-3}$ ) $p=4 \times 10^{-4}$  | 0              | $1 \times 10^{-3}$ ( $5 \times 10^{-4}$ , $2 \times 10^{-3}$ ) $p=5 \times 10^{-4}$    | 0              |  |
| <b>IDL</b>                                          |                                                                                        |                |                                                                                        |                |  |
| Particle concentration (mol/l)                      | $4 \times 10^{-10}$ ( $-7 \times 10^{-11}$ , $8 \times 10^{-10}$ ) $p=0.10$            | 0              | $1 \times 10^{-10}$ ( $-4 \times 10^{-10}$ , $6 \times 10^{-10}$ ) $p=0.69$            | 0              |  |
| Total lipids (mmol/l)                               | $5 \times 10^{-3}$ ( $-1 \times 10^{-4}$ , 0.01) $p=0.06$                              | 0              | $2 \times 10^{-3}$ ( $-4 \times 10^{-3}$ , 0.01) $p=0.61$                              | 0              |  |
| Phospholipids (mmol/l)                              | $1 \times 10^{-3}$ ( $-3 \times 10^{-4}$ , $2 \times 10^{-3}$ ) $p=0.12$               | 0              | $2 \times 10^{-4}$ ( $-1 \times 10^{-3}$ , $2 \times 10^{-3}$ ) $p=0.81$               | 0              |  |
| Total cholesterol (mmol/l)                          | $4 \times 10^{-3}$ ( $4 \times 10^{-4}$ , 0.01) $p=0.03$                               | 0              | $9.9 \times 10^{-4}$ ( $-3 \times 10^{-3}$ , 0.01) $p=0.63$                            | 0              |  |

S4 Table. Two-stage IPD meta-analysis: offspring lipoproteins, lipids and metabolites absolute concentration differences per 1-SD higher parental BMI.

| Two stage-Individual Participant Data meta-analysis |                                                                                           |                |                                                                                        |                |  |
|-----------------------------------------------------|-------------------------------------------------------------------------------------------|----------------|----------------------------------------------------------------------------------------|----------------|--|
| Metabolites                                         | mother                                                                                    | $I^2_{mother}$ | father                                                                                 | $I^2_{father}$ |  |
| Cholesterol esters (mmol/l)                         | $3 \times 10^{-3}$ ( $9 \times 10^{-4}$ , 0.01) $p=0.01$                                  | 0              | $1 \times 10^{-3}$ ( $-2 \times 10^{-3}$ , $4 \times 10^{-3}$ ) $p=0.44$               | 0              |  |
| Free cholesterol (mmol/l)                           | $5 \times 10^{-4}$ ( $-5 \times 10^{-4}$ , $2 \times 10^{-3}$ ) $p=0.34$                  | 0              | $-2 \times 10^{-4}$ ( $-1 \times 10^{-3}$ , $9.9 \times 10^{-4}$ ) $p=0.78$            | 0              |  |
| Triglycerides (mmol/l)                              | $2 \times 10^{-4}$ ( $-4 \times 10^{-4}$ , $8 \times 10^{-4}$ ) $p=0.46$                  | 0              | $4 \times 10^{-4}$ ( $-2 \times 10^{-4}$ , $1 \times 10^{-3}$ ) $p=0.18$               | 0              |  |
| <b>Large LDL</b>                                    |                                                                                           |                |                                                                                        |                |  |
| Particle concentration (mol/l)                      | $7 \times 10^{-10}$ ( $-3 \times 10^{-11}$ , $1 \times 10^{-9}$ ) $p=0.06$                | 0              | $3 \times 10^{-10}$ ( $-5 \times 10^{-10}$ , $1 \times 10^{-9}$ ) $p=0.45$             | 0              |  |
| Total lipids (mmol/l)                               | 0.01 ( $-1 \times 10^{-4}$ , 0.01) $p=0.05$                                               | 0              | $3 \times 10^{-3}$ ( $-4 \times 10^{-3}$ , 0.01) $p=0.44$                              | 0              |  |
| Phospholipids (mmol/l)                              | $1 \times 10^{-3}$ ( $2 \times 10^{-4}$ , $3 \times 10^{-3}$ ) $p=0.02$                   | 0              | $8 \times 10^{-4}$ ( $-7 \times 10^{-4}$ , $2 \times 10^{-3}$ ) $p=0.31$               | 0              |  |
| Total cholesterol (mmol/l)                          | $5 \times 10^{-3}$ ( $1 \times 10^{-4}$ , 0.01) $p=0.04$                                  | 0              | $2 \times 10^{-3}$ ( $-4 \times 10^{-3}$ , 0.01) $p=0.50$                              | 0              |  |
| Cholesterol esters (mmol/l)                         | $4 \times 10^{-3}$ ( $5 \times 10^{-4}$ , 0.01) $p=0.02$                                  | 0              | $2 \times 10^{-3}$ ( $-2 \times 10^{-3}$ , 0.01) $p=0.39$                              | 0              |  |
| Free cholesterol (mmol/l)                           | $7 \times 10^{-4}$ ( $-4 \times 10^{-4}$ , $2 \times 10^{-3}$ ) $p=0.22$                  | 0              | $5 \times 10^{-5}$ ( $-1 \times 10^{-3}$ , $1 \times 10^{-3}$ ) $p=0.94$               | 0              |  |
| Triglycerides (mmol/l)                              | $-1 \times 10^{-5}$ ( $-6 \times 10^{-4}$ , $6 \times 10^{-4}$ ) $p=0.97$                 | 0              | $2 \times 10^{-4}$ ( $-4 \times 10^{-4}$ , $9 \times 10^{-4}$ ) $p=0.53$               | 0              |  |
| <b>Medium LDL</b>                                   |                                                                                           |                |                                                                                        |                |  |
| Particle concentration (mol/l)                      | $7 \times 10^{-10}$ ( $9 \times 10^{-11}$ , $1 \times 10^{-9}$ ) $p=0.02$                 | 0              | $4 \times 10^{-10}$ ( $-3 \times 10^{-10}$ , $1 \times 10^{-9}$ ) $p=0.27$             | 0              |  |
| Total lipids (mmol/l)                               | $4 \times 10^{-3}$ ( $4 \times 10^{-4}$ , 0.01) $p=0.03$                                  | 0              | $2 \times 10^{-3}$ ( $-2 \times 10^{-3}$ , 0.01) $p=0.31$                              | 0              |  |
| Phospholipids (mmol/l)                              | $1 \times 10^{-3}$ ( $4 \times 10^{-4}$ , $2 \times 10^{-3}$ ) $p=4 \times 10^{-3}$       | 0              | $7 \times 10^{-4}$ ( $-2 \times 10^{-4}$ , $2 \times 10^{-3}$ ) $p=0.14$               | 0              |  |
| Total cholesterol (mmol/l)                          | $3 \times 10^{-3}$ ( $2 \times 10^{-4}$ , 0.01) $p=0.04$                                  | 0              | $1 \times 10^{-3}$ ( $-2 \times 10^{-3}$ , $5 \times 10^{-3}$ ) $p=0.38$               | 0              |  |
| Cholesterol esters (mmol/l)                         | $3 \times 10^{-3}$ ( $2 \times 10^{-4}$ , $5 \times 10^{-3}$ ) $p=0.03$                   | 0              | $1 \times 10^{-3}$ ( $-1 \times 10^{-3}$ , $4 \times 10^{-3}$ ) $p=0.35$               | 0              |  |
| Free cholesterol (mmol/l)                           | $5 \times 10^{-4}$ ( $-4 \times 10^{-5}$ , $1 \times 10^{-3}$ ) $p=0.07$                  | 0              | $2 \times 10^{-4}$ ( $-5 \times 10^{-4}$ , $8 \times 10^{-4}$ ) $p=0.58$               | 0              |  |
| Triglycerides (mmol/l)                              | $-3 \times 10^{-5}$ ( $-3 \times 10^{-4}$ , $3 \times 10^{-4}$ ) $p=0.88$                 | 0              | $8 \times 10^{-5}$ ( $-3 \times 10^{-4}$ , $5 \times 10^{-4}$ ) $p=0.66$               | 7              |  |
| <b>Small LDL</b>                                    |                                                                                           |                |                                                                                        |                |  |
| Particle concentration (mol/l)                      | $8 \times 10^{-10}$ ( $6 \times 10^{-11}$ , $1 \times 10^{-9}$ ) $p=0.03$                 | 0              | $4 \times 10^{-10}$ ( $-4 \times 10^{-10}$ , $1 \times 10^{-9}$ ) $p=0.30$             | 0              |  |
| Total lipids (mmol/l)                               | $2 \times 10^{-3}$ ( $1 \times 10^{-4}$ , $5 \times 10^{-3}$ ) $p=0.04$                   | 0              | $1 \times 10^{-3}$ ( $-1 \times 10^{-3}$ , $4 \times 10^{-3}$ ) $p=0.30$               | 0              |  |
| Phospholipids (mmol/l)                              | $6 \times 10^{-4}$ ( $1 \times 10^{-4}$ , $1 \times 10^{-3}$ ) $p=0.02$                   | 0              | $4 \times 10^{-4}$ ( $-2 \times 10^{-4}$ , $1 \times 10^{-3}$ ) $p=0.17$               | 0              |  |
| Total cholesterol (mmol/l)                          | $2 \times 10^{-3}$ ( $-6 \times 10^{-5}$ , $3 \times 10^{-3}$ ) $p=0.06$                  | 0              | $8 \times 10^{-4}$ ( $-1 \times 10^{-3}$ , $3 \times 10^{-3}$ ) $p=0.44$               | 0              |  |
| Cholesterol esters (mmol/l)                         | $1 \times 10^{-3}$ ( $-3 \times 10^{-5}$ , $3 \times 10^{-3}$ ) $p=0.06$                  | 0              | $7 \times 10^{-4}$ ( $-9.8 \times 10^{-4}$ , $2 \times 10^{-3}$ ) $p=0.42$             | 0              |  |
| Free cholesterol (mmol/l)                           | $3 \times 10^{-4}$ ( $-5 \times 10^{-5}$ , $6 \times 10^{-4}$ ) $p=0.10$                  | 0              | $1 \times 10^{-4}$ ( $-3 \times 10^{-4}$ , $5 \times 10^{-4}$ ) $p=0.59$               | 0              |  |
| Triglycerides (mmol/l)                              | $2 \times 10^{-4}$ ( $-3 \times 10^{-5}$ , $4 \times 10^{-4}$ ) $p=0.10$                  | 0              | $2 \times 10^{-4}$ ( $-8 \times 10^{-5}$ , $5 \times 10^{-4}$ ) $p=0.16$               | 39             |  |
| <b>Very large HDL</b>                               |                                                                                           |                |                                                                                        |                |  |
| Particle concentration (mol/l)                      | $-9.9 \times 10^{-9}$ ( $-1 \times 10^{-8}$ , $-7 \times 10^{-9}$ ) $p=6 \times 10^{-10}$ | 0              | $-9 \times 10^{-9}$ ( $-1 \times 10^{-8}$ , $-5 \times 10^{-9}$ ) $p=2 \times 10^{-6}$ | 0              |  |
| Total lipids (mmol/l)                               | -0.01 (-0.01, -0.01) $p=1 \times 10^{-7}$                                                 | 20             | -0.01 (-0.02, -0.01) $p=8 \times 10^{-7}$                                              | 0              |  |
| Phospholipids (mmol/l)                              | -0.01 (-0.01, $-4 \times 10^{-3}$ ) $p=3 \times 10^{-11}$                                 | 0              | -0.01 (-0.01, $-3 \times 10^{-3}$ ) $p=1 \times 10^{-6}$                               | 0              |  |
| Total cholesterol (mmol/l)                          | $-4 \times 10^{-3}$ (-0.01, $-2 \times 10^{-3}$ ) $p=1 \times 10^{-3}$                    | 53             | -0.01 (-0.01, $-3 \times 10^{-3}$ ) $p=2 \times 10^{-6}$                               | 0              |  |
| Cholesterol esters (mmol/l)                         | $-3 \times 10^{-3}$ (-0.01, $-9 \times 10^{-4}$ ) $p=0.01$                                | 60             | $-4 \times 10^{-3}$ (-0.01, $-2 \times 10^{-3}$ ) $p=3 \times 10^{-6}$                 | 0              |  |
| Free cholesterol (mmol/l)                           | $-1 \times 10^{-3}$ ( $-2 \times 10^{-3}$ , $-9 \times 10^{-4}$ ) $p=9 \times 10^{-8}$    | 13             | $-1 \times 10^{-3}$ ( $-2 \times 10^{-3}$ , $-9 \times 10^{-4}$ ) $p=1 \times 10^{-6}$ | 0              |  |
| Triglycerides (mmol/l)                              | $-1 \times 10^{-4}$ ( $-3 \times 10^{-4}$ , $7 \times 10^{-7}$ ) $p=0.05$                 | 0              | $-1 \times 10^{-4}$ ( $-3 \times 10^{-4}$ , $4 \times 10^{-5}$ ) $p=0.16$              | 0              |  |
| <b>Large HDL</b>                                    |                                                                                           |                |                                                                                        |                |  |
| Particle concentration (mol/l)                      | $-2 \times 10^{-8}$ ( $-3 \times 10^{-8}$ , $-2 \times 10^{-8}$ ) $p=2 \times 10^{-10}$   | 0              | $-2 \times 10^{-8}$ ( $-3 \times 10^{-8}$ , $-6 \times 10^{-9}$ ) $p=1 \times 10^{-3}$ | 25             |  |
| Total lipids (mmol/l)                               | -0.02 (-0.02, -0.01) $p=1 \times 10^{-10}$                                                | 0              | -0.01 (-0.02, -0.01) $p=9 \times 10^{-5}$                                              | 0              |  |
| Phospholipids (mmol/l)                              | -0.01 (-0.01, $-5 \times 10^{-3}$ ) $p=3 \times 10^{-9}$                                  | 0              | $-4 \times 10^{-3}$ (-0.01, $-2 \times 10^{-3}$ ) $p=7 \times 10^{-4}$                 | 0              |  |
| Total cholesterol (mmol/l)                          | -0.01 (-0.01, -0.01) $p=4 \times 10^{-12}$                                                | 0              | -0.01 (-0.01, $-4 \times 10^{-3}$ ) $p=1 \times 10^{-5}$                               | 0              |  |
| Cholesterol esters (mmol/l)                         | -0.01 (-0.01, -0.01) $p=4 \times 10^{-12}$                                                | 0              | -0.01 (-0.01, $-3 \times 10^{-3}$ ) $p=1 \times 10^{-5}$                               | 0              |  |
| Free cholesterol (mmol/l)                           | $-2 \times 10^{-3}$ ( $-3 \times 10^{-3}$ , $-2 \times 10^{-3}$ ) $p=8 \times 10^{-12}$   | 0              | $-2 \times 10^{-3}$ ( $-3 \times 10^{-3}$ , $-7 \times 10^{-4}$ ) $p=6 \times 10^{-4}$ | 37             |  |
| Triglycerides (mmol/l)                              | $-1 \times 10^{-4}$ ( $-4 \times 10^{-4}$ , $1 \times 10^{-4}$ ) $p=0.28$                 | 26             | $-2 \times 10^{-4}$ ( $-7 \times 10^{-4}$ , $3 \times 10^{-4}$ ) $p=0.50$              | 69             |  |
| <b>Medium HDL</b>                                   |                                                                                           |                |                                                                                        |                |  |
| Particle concentration (mol/l)                      | $-1 \times 10^{-9}$ ( $-8 \times 10^{-9}$ , $6 \times 10^{-9}$ ) $p=0.77$                 | 0              | $6 \times 10^{-9}$ ( $-2 \times 10^{-9}$ , $1 \times 10^{-8}$ ) $p=0.12$               | 0              |  |
| Total lipids (mmol/l)                               | $-1 \times 10^{-3}$ ( $-4 \times 10^{-3}$ , $2 \times 10^{-3}$ ) $p=0.47$                 | 0              | $2 \times 10^{-3}$ ( $-1 \times 10^{-3}$ , 0.01) $p=0.23$                              | 0              |  |
| Phospholipids (mmol/l)                              | $-9.9 \times 10^{-4}$ ( $-3 \times 10^{-3}$ , $5 \times 10^{-4}$ ) $p=0.21$               | 0              | $9 \times 10^{-4}$ ( $-8 \times 10^{-4}$ , $3 \times 10^{-3}$ ) $p=0.30$               | 0              |  |
| Total cholesterol (mmol/l)                          | $-9 \times 10^{-4}$ ( $-3 \times 10^{-3}$ , $8 \times 10^{-4}$ ) $p=0.29$                 | 0              | $6 \times 10^{-4}$ ( $-1 \times 10^{-3}$ , $2 \times 10^{-3}$ ) $p=0.53$               | 0              |  |
| Cholesterol esters (mmol/l)                         | $-8 \times 10^{-4}$ ( $-2 \times 10^{-3}$ , $6 \times 10^{-4}$ ) $p=0.27$                 | 0              | $4 \times 10^{-4}$ ( $-1 \times 10^{-3}$ , $2 \times 10^{-3}$ ) $p=0.57$               | 0              |  |
| Free cholesterol (mmol/l)                           | $-1 \times 10^{-4}$ ( $-5 \times 10^{-4}$ , $2 \times 10^{-4}$ ) $p=0.45$                 | 14             | $1 \times 10^{-4}$ ( $-2 \times 10^{-4}$ , $5 \times 10^{-4}$ ) $p=0.38$               | 0              |  |
| Triglycerides (mmol/l)                              | $7 \times 10^{-4}$ ( $4 \times 10^{-4}$ , $9 \times 10^{-4}$ ) $p=2 \times 10^{-7}$       | 0              | $6 \times 10^{-4}$ ( $1 \times 10^{-4}$ , $1 \times 10^{-3}$ ) $p=0.02$                | 60             |  |
| <b>Small HDL</b>                                    |                                                                                           |                |                                                                                        |                |  |
| Particle concentration (mol/l)                      | $1 \times 10^{-8}$ ( $4 \times 10^{-9}$ , $2 \times 10^{-8}$ ) $p=0.01$                   | 2              | $2 \times 10^{-8}$ ( $1 \times 10^{-8}$ , $3 \times 10^{-8}$ ) $p=4 \times 10^{-5}$    | 0              |  |
| Total lipids (mmol/l)                               | $2 \times 10^{-3}$ ( $-4 \times 10^{-4}$ , $5 \times 10^{-3}$ ) $p=0.10$                  | 0              | 0.01 ( $3 \times 10^{-3}$ , 0.01) $p=3 \times 10^{-4}$                                 | 0              |  |

S4 Table. Two-stage IPD meta-analysis: offspring lipoproteins, lipids and metabolites absolute concentration differences per 1-SD higher parental BMI.

| Two stage-Individual Participant Data meta-analysis |                                                                                     |                |                                                                                        |                |  |
|-----------------------------------------------------|-------------------------------------------------------------------------------------|----------------|----------------------------------------------------------------------------------------|----------------|--|
| Metabolites                                         | mother                                                                              | $I^2_{mother}$ | father                                                                                 | $I^2_{father}$ |  |
| Phospholipids (mmol/l)                              | $1 \times 10^{-3}$ ( $-6 \times 10^{-4}$ , $3 \times 10^{-3}$ ) $p=0.18$            | 31             | $3 \times 10^{-3}$ ( $1 \times 10^{-3}$ , $5 \times 10^{-3}$ ) $p=3 \times 10^{-4}$    | 0              |  |
| Total cholesterol (mmol/l)                          | $6 \times 10^{-5}$ ( $-1 \times 10^{-3}$ , $1 \times 10^{-3}$ ) $p=0.93$            | 0              | $2 \times 10^{-3}$ ( $1 \times 10^{-4}$ , $3 \times 10^{-3}$ ) $p=0.04$                | 0              |  |
| Cholesterol esters (mmol/l)                         | $1 \times 10^{-4}$ ( $-9.9 \times 10^{-4}$ , $1 \times 10^{-3}$ ) $p=0.83$          | 0              | $1 \times 10^{-3}$ ( $-3 \times 10^{-5}$ , $3 \times 10^{-3}$ ) $p=0.06$               | 0              |  |
| Free cholesterol (mmol/l)                           | $-8 \times 10^{-5}$ ( $-4 \times 10^{-4}$ , $3 \times 10^{-4}$ ) $p=0.66$           | 0              | $4 \times 10^{-4}$ ( $1 \times 10^{-5}$ , $8 \times 10^{-4}$ ) $p=0.04$                | 0              |  |
| Triglycerides (mmol/l)                              | $5 \times 10^{-4}$ ( $3 \times 10^{-4}$ , $8 \times 10^{-4}$ ) $p=5 \times 10^{-5}$ | 0              | $6 \times 10^{-4}$ ( $3 \times 10^{-4}$ , $9 \times 10^{-4}$ ) $p=7 \times 10^{-5}$    | 9              |  |
| <b>Lipoprotein particle size</b>                    |                                                                                     |                |                                                                                        |                |  |
| VLDL particle size (nm)                             | 0.06 (0.02, 0.09) $p=3 \times 10^{-3}$                                              | 59             | 0.06 (0.03, 0.09) $p=1 \times 10^{-4}$                                                 | 0              |  |
| LDL particle size (nm)                              | $-2 \times 10^{-3}$ (-0.01, $3 \times 10^{-3}$ ) $p=0.36$                           | 69             | $-3 \times 10^{-3}$ (-0.01, $6 \times 10^{-4}$ ) $p=0.10$                              | 0              |  |
| HDL particle size (nm)                              | -0.01 (-0.02, -0.01) $p=1 \times 10^{-12}$                                          | 0              | -0.01 (-0.02, -0.01) $p=7 \times 10^{-9}$                                              | 0              |  |
| <b>Cholesterol</b>                                  |                                                                                     |                |                                                                                        |                |  |
| Total cholesterol (mmol/l)                          | 0.01 (-0.01, 0.03) $p=0.26$                                                         | 0              | $4 \times 10^{-3}$ (-0.02, 0.02) $p=0.70$                                              | 0              |  |
| VLDL cholesterol (mmol/l)                           | 0.01 (0.01, 0.02) $p=5 \times 10^{-8}$                                              | 0              | 0.01 ( $4 \times 10^{-3}$ , 0.01) $p=6 \times 10^{-4}$                                 | 0              |  |
| Remnant cholesterol (mmol/l)                        | 0.02 (0.01, 0.02) $p=1 \times 10^{-5}$                                              | 0              | 0.01 ( $2 \times 10^{-3}$ , 0.02) $p=0.02$                                             | 0              |  |
| LDL cholesterol (mmol/l)                            | 0.01 ( $2 \times 10^{-5}$ , 0.02) $p=0.05$                                          | 0              | $4 \times 10^{-3}$ (-0.01, 0.01) $p=0.45$                                              | 0              |  |
| HDL cholesterol (mmol/l)                            | -0.02 (-0.02, -0.01) $p=7 \times 10^{-8}$                                           | 0              | -0.01 (-0.02, $-3 \times 10^{-3}$ ) $p=3 \times 10^{-3}$                               | 0              |  |
| HDL <sub>2</sub> cholesterol (mmol/l)               | -0.01 (-0.02, -0.01) $p=2 \times 10^{-8}$                                           | 0              | -0.01 (-0.01, $-3 \times 10^{-3}$ ) $p=1 \times 10^{-3}$                               | 0              |  |
| HDL <sub>3</sub> cholesterol (mmol/l)               | $-2 \times 10^{-3}$ ( $-3 \times 10^{-3}$ , $9 \times 10^{-5}$ ) $p=0.06$           | 63             | $-9 \times 10^{-4}$ ( $-3 \times 10^{-3}$ , $1 \times 10^{-3}$ ) $p=0.46$              | 55             |  |
| Esterified cholesterol (mmol/l)                     | 0.01 ( $-5 \times 10^{-3}$ , 0.02) $p=0.23$                                         | 0              | $2 \times 10^{-3}$ (-0.01, 0.02) $p=0.76$                                              | 0              |  |
| Free cholesterol (mmol/l)                           | $3 \times 10^{-3}$ ( $-2 \times 10^{-3}$ , 0.01) $p=0.28$                           | 0              | $2 \times 10^{-3}$ ( $-4 \times 10^{-3}$ , 0.01) $p=0.61$                              | 0              |  |
| <b>Glycerides and phospholipids</b>                 |                                                                                     |                |                                                                                        |                |  |
| Triglycerides (mmol/l)                              | 0.02 (0.01, 0.03) $p=2 \times 10^{-6}$                                              | 0              | 0.02 (0.01, 0.03) $p=4 \times 10^{-5}$                                                 | 0              |  |
| VLDL triglycerides (mmol/l)                         | 0.02 (0.01, 0.03) $p=1 \times 10^{-7}$                                              | 0              | 0.02 (0.01, 0.03) $p=8 \times 10^{-6}$                                                 | 0              |  |
| LDL triglycerides (mmol/l)                          | $1 \times 10^{-4}$ ( $-9.5 \times 10^{-4}$ , $1 \times 10^{-3}$ ) $p=0.83$          | 0              | $5 \times 10^{-4}$ ( $-8 \times 10^{-4}$ , $2 \times 10^{-3}$ ) $p=0.47$               | 15             |  |
| HDL triglycerides (mmol/l)                          | $9.5 \times 10^{-4}$ ( $3 \times 10^{-4}$ , $2 \times 10^{-3}$ ) $p=0.01$           | 0              | $8 \times 10^{-4}$ ( $-6 \times 10^{-4}$ , $2 \times 10^{-3}$ ) $p=0.27$               | 69             |  |
| Phosphoglycerides (mmol/l)                          | $9 \times 10^{-5}$ (-0.01, 0.01) $p=0.98$                                           | 0              | $3 \times 10^{-3}$ (-0.01, 0.01) $p=0.47$                                              | 0              |  |
| Phosphatidylcholine + other cholines (mmol/l)       | $-1 \times 10^{-3}$ (-0.01, 0.01) $p=0.77$                                          | 0              | $4 \times 10^{-3}$ ( $-4 \times 10^{-3}$ , 0.01) $p=0.34$                              | 0              |  |
| Cholines (mmol/l)                                   | $-1 \times 10^{-3}$ (-0.01, 0.01) $p=0.72$                                          | 0              | $1 \times 10^{-3}$ (-0.01, 0.01) $p=0.76$                                              | 0              |  |
| <b>Apolipoproteins</b>                              |                                                                                     |                |                                                                                        |                |  |
| Apolipoprotein A-I (g/l)                            | -0.01 (-0.01, $-2 \times 10^{-3}$ ) $p=1 \times 10^{-3}$                            | 0              | $-3 \times 10^{-3}$ (-0.01, $1 \times 10^{-3}$ ) $p=0.17$                              | 0              |  |
| Apolipoprotein B (g/l)                              | 0.01 ( $4 \times 10^{-3}$ , 0.01) $p=1 \times 10^{-5}$                              | 0              | 0.01 ( $2 \times 10^{-3}$ , 0.01) $p=0.01$                                             | 0              |  |
| <b>Fatty acids</b>                                  |                                                                                     |                |                                                                                        |                |  |
| Total fatty acids (mmol/l)                          | 0.05 (0.01, 0.10) $p=0.01$                                                          | 0              | 0.06 (0.01, 0.11) $p=0.02$                                                             | 0              |  |
| Degree of unsaturation                              | $-6 \times 10^{-4}$ ( $-2 \times 10^{-3}$ , $5 \times 10^{-4}$ ) $p=0.29$           | 0              | $7 \times 10^{-5}$ ( $-2 \times 10^{-3}$ , $2 \times 10^{-3}$ ) $p=0.94$               | 37             |  |
| Docosahexaenoic acid (mmol/l)                       | $-9 \times 10^{-5}$ ( $-1 \times 10^{-3}$ , $1 \times 10^{-3}$ ) $p=0.90$           | 53             | $1 \times 10^{-3}$ ( $9 \times 10^{-5}$ , $2 \times 10^{-3}$ ) $p=0.03$                | 0              |  |
| Linoleic acid (mmol/l)                              | $3 \times 10^{-3}$ (-0.01, 0.02) $p=0.64$                                           | 48             | $3 \times 10^{-3}$ (-0.01, 0.02) $p=0.63$                                              | 0              |  |
| n-3 fatty acids (mmol/l)                            | $6 \times 10^{-4}$ ( $-2 \times 10^{-3}$ , $3 \times 10^{-3}$ ) $p=0.60$            | 0              | $3 \times 10^{-3}$ ( $-5 \times 10^{-4}$ , 0.01) $p=0.10$                              | 36             |  |
| n-6 fatty acids (mmol/l)                            | 0.01 (-0.01, 0.02) $p=0.34$                                                         | 18             | 0.01 (-0.01, 0.02) $p=0.43$                                                            | 0              |  |
| PUFA (mmol/l)                                       | 0.01 (-0.01, 0.02) $p=0.27$                                                         | 0              | 0.01 (-0.01, 0.02) $p=0.31$                                                            | 0              |  |
| MUFA (mmol/l)                                       | 0.03 (0.01, 0.04) $p=2 \times 10^{-4}$                                              | 0              | 0.03 (0.01, 0.05) $p=0.01$                                                             | 38             |  |
| Saturated fatty acids (mmol/l)                      | 0.02 ( $6 \times 10^{-4}$ , 0.03) $p=0.04$                                          | 0              | 0.02 ( $-3 \times 10^{-3}$ , 0.04) $p=0.09$                                            | 0              |  |
| <b>Fatty acids ratios</b>                           |                                                                                     |                |                                                                                        |                |  |
| Docosahexaenoic acid (%)                            | -0.01 (-0.02, 0.01) $p=0.44$                                                        | 80             | $5 \times 10^{-3}$ ( $-4 \times 10^{-3}$ , 0.01) $p=0.26$                              | 14             |  |
| Linoleic acid (%)                                   | -0.09 (-0.15, -0.04) $p=6 \times 10^{-4}$                                           | 14             | -0.10 (-0.26, 0.06) $p=0.21$                                                           | 83             |  |
| n-3 fatty acids (%)                                 | -0.01 (-0.03, 0.01) $p=0.28$                                                        | 37             | 0.01 (-0.02, 0.04) $p=0.59$                                                            | 68             |  |
| n-6 fatty acids (%)                                 | -0.10 (-0.15, -0.05) $p=2 \times 10^{-4}$                                           | 0              | -0.11 (-0.27, 0.05) $p=0.19$                                                           | 83             |  |
| PUFA (%)                                            | -0.11 (-0.16, -0.05) $p=2 \times 10^{-4}$                                           | 0              | -0.10 (-0.29, 0.10) $p=0.33$                                                           | 87             |  |
| MUFA (%)                                            | 0.11 (0.05, 0.17) $p=2 \times 10^{-4}$                                              | 13             | 0.15 (-0.01, 0.31) $p=0.07$                                                            | 77             |  |
| Saturated fatty acids (%)                           | -0.01 (-0.08, 0.06) $p=0.75$                                                        | 63             | -0.06 (-0.11, $5 \times 10^{-4}$ ) $p=0.05$                                            | 0              |  |
| <b>Glycolysis related metabolites</b>               |                                                                                     |                |                                                                                        |                |  |
| Glucose (mmol/l)                                    | $5 \times 10^{-3}$ (-0.01, 0.02) $p=0.58$                                           | 42             | 0.01 (-0.01, 0.02) $p=0.30$                                                            | 0              |  |
| Lactate (mmol/l)                                    | $2 \times 10^{-3}$ (-0.01, 0.01) $p=0.67$                                           | 0              | -0.01 (-0.02, $4 \times 10^{-3}$ ) $p=0.25$                                            | 0              |  |
| Pyruvate (mmol/l)                                   | $6 \times 10^{-4}$ ( $-4 \times 10^{-4}$ , $2 \times 10^{-3}$ ) $p=0.26$            | 72             | $2 \times 10^{-5}$ ( $-8 \times 10^{-4}$ , $9 \times 10^{-4}$ ) $p=0.96$               | 32             |  |
| Citrate (mmol/l)                                    | $-8 \times 10^{-4}$ ( $-1 \times 10^{-3}$ , $-4 \times 10^{-5}$ ) $p=0.04$          | 65             | $-1 \times 10^{-3}$ ( $-2 \times 10^{-3}$ , $-6 \times 10^{-4}$ ) $p=2 \times 10^{-4}$ | 0              |  |
| <b>Amino acids</b>                                  |                                                                                     |                |                                                                                        |                |  |

S4 Table. Two-stage IPD meta-analysis: offspring lipoproteins, lipids and metabolites absolute concentration differences per 1-SD higher parental BMI.

| Two stage-Individual Participant Data meta-analysis |                                                                                     |                |                                                                                       |                |  |
|-----------------------------------------------------|-------------------------------------------------------------------------------------|----------------|---------------------------------------------------------------------------------------|----------------|--|
| Metabolites                                         | mother                                                                              | $I^2_{mother}$ | father                                                                                | $I^2_{father}$ |  |
| Alanine (mmol/l)                                    | $5 \times 10^{-4}$ ( $-8 \times 10^{-4}$ , $2 \times 10^{-3}$ ) $p=0.47$            | 0              | $-6 \times 10^{-4}$ ( $-2 \times 10^{-3}$ , $1 \times 10^{-3}$ ) $p=0.48$             | 0              |  |
| Glutamine (mmol/l)                                  | $-1 \times 10^{-3}$ ( $-3 \times 10^{-3}$ , $6 \times 10^{-4}$ ) $p=0.20$           | 0              | $-2 \times 10^{-3}$ ( $-4 \times 10^{-3}$ , $-7 \times 10^{-4}$ ) $p=0.00$            | 0              |  |
| Histidine (mmol/l)                                  | $1 \times 10^{-4}$ ( $-1 \times 10^{-4}$ , $4 \times 10^{-4}$ ) $p=0.34$            | 22             | $3 \times 10^{-4}$ ( $-3 \times 10^{-5}$ , $6 \times 10^{-4}$ ) $p=0.08$              | 0              |  |
| <b>Branched-chain amino acids</b>                   |                                                                                     |                |                                                                                       |                |  |
| Isoleucine (mmol/l)                                 | $7 \times 10^{-4}$ ( $4 \times 10^{-4}$ , $1 \times 10^{-3}$ ) $p=5 \times 10^{-6}$ | 23             | $7 \times 10^{-4}$ ( $4 \times 10^{-4}$ , $1 \times 10^{-3}$ ) $p=2 \times 10^{-5}$   | 0              |  |
| Leucine (mmol/l)                                    | $6 \times 10^{-4}$ ( $3 \times 10^{-4}$ , $9 \times 10^{-4}$ ) $p=1 \times 10^{-5}$ | 13             | $7 \times 10^{-4}$ ( $4 \times 10^{-5}$ , $1 \times 10^{-3}$ ) $p=0.04$               | 77             |  |
| Valine (mmol/l)                                     | $2 \times 10^{-3}$ ( $9 \times 10^{-4}$ , $2 \times 10^{-3}$ ) $p=5 \times 10^{-5}$ | 24             | $2 \times 10^{-3}$ ( $9.7 \times 10^{-4}$ , $3 \times 10^{-3}$ ) $p=3 \times 10^{-5}$ | 0              |  |
| <b>Aromatic amino acids</b>                         |                                                                                     |                |                                                                                       |                |  |
| Phenylalanine (mmol/l)                              | $7 \times 10^{-4}$ ( $2 \times 10^{-4}$ , $1 \times 10^{-3}$ ) $p=0.01$             | 84             | $3 \times 10^{-4}$ ( $-8 \times 10^{-5}$ , $6 \times 10^{-4}$ ) $p=0.13$              | 60             |  |
| Tyrosine (mmol/l)                                   | $5 \times 10^{-4}$ ( $1 \times 10^{-4}$ , $8 \times 10^{-4}$ ) $p=0.01$             | 48             | $4 \times 10^{-4}$ ( $5 \times 10^{-5}$ , $7 \times 10^{-4}$ ) $p=0.02$               | 0              |  |
| <b>Ketone bodies</b>                                |                                                                                     |                |                                                                                       |                |  |
| Acetate (mmol/l)                                    | $-5 \times 10^{-4}$ ( $-1 \times 10^{-3}$ , $3 \times 10^{-4}$ ) $p=0.24$           | 80             | $-3 \times 10^{-4}$ ( $-1 \times 10^{-3}$ , $4 \times 10^{-4}$ ) $p=0.41$             | 57             |  |
| Acetoacetate (mmol/l)                               | $-5 \times 10^{-4}$ ( $-2 \times 10^{-3}$ , $1 \times 10^{-3}$ ) $p=0.56$           | 76             | $3 \times 10^{-4}$ ( $-8 \times 10^{-4}$ , $1 \times 10^{-3}$ ) $p=0.58$              | 0              |  |
| Beta-hydroxybutyrate (mmol/l)                       | $-2 \times 10^{-3}$ ( $-0.01$ , $2 \times 10^{-3}$ ) $p=0.25$                       | 70             | $-2 \times 10^{-4}$ ( $-3 \times 10^{-3}$ , $3 \times 10^{-3}$ ) $p=0.92$             | 7              |  |
| <b>Fluid balance</b>                                |                                                                                     |                |                                                                                       |                |  |
| Creatinine (mmol/l)                                 | $2 \times 10^{-4}$ ( $-1 \times 10^{-5}$ , $4 \times 10^{-4}$ ) $p=0.06$            | 0              | $4 \times 10^{-4}$ ( $2 \times 10^{-4}$ , $7 \times 10^{-4}$ ) $p=8 \times 10^{-4}$   | 0              |  |
| Albumin (signal area)                               | $-8 \times 10^{-5}$ ( $-3 \times 10^{-4}$ , $1 \times 10^{-4}$ ) $p=0.38$           | 15             | $-6 \times 10^{-6}$ ( $-2 \times 10^{-4}$ , $2 \times 10^{-4}$ ) $p=0.94$             | 0              |  |
| <b>Inflammation</b>                                 |                                                                                     |                |                                                                                       |                |  |
| Glycoprotein acetyls (mmol/l)                       | 0.01 (0.01, 0.02) $p=7 \times 10^{-8}$                                              | 0              | 0.01 ( $5 \times 10^{-3}$ , 0.01) $p=4 \times 10^{-5}$                                | 0              |  |

Associations were adjusted for parental age, smoking, education, head of household social class, maternal parity, offspring's age at blood collection and sex.

$I^2$  statistics indicates between-cohort heterogeneity (very low  $\leq 50\%$ ; substantial=50-75%; very high  $\geq 75\%$ ).

S4 Table correspond to the SD-scaled metabolite concentration shown in S3 Fig.
