# Supplementary material for: Association of pre-pregnancy body mass index with offspring metabolic profile: Analyses of 3 European prospective birth cohorts
Source: PubMed Central journal article supplement (PMC5568725; doi:10.1371/journal.pmed.1002376), 2017-08-22
Supplement: pmed.1002376.s012.pdf [file pmed.1002376.s012.pdf]

S5 Table. ALSPAC: offspring lipoproteins, lipids and metabolites absolute concentration differences per 1-SD higher parental BMI.

| Avon Longitudinal Study of Parents and Children (ALSPAC) |                                                                                         |                                                                                        |            |
|----------------------------------------------------------|-----------------------------------------------------------------------------------------|----------------------------------------------------------------------------------------|------------|
| Metabolites                                              | mother                                                                                  | father                                                                                 | $P_{boot}$ |
| <b>Lipoprotein subclasses</b>                            |                                                                                         |                                                                                        |            |
| <i>Extremely large VLDL</i>                              |                                                                                         |                                                                                        |            |
| Particle concentration (mol/l)                           | $7 \times 10^{-12}$ ( $4 \times 10^{-12}$ , $10 \times 10^{-12}$ ) $p=2 \times 10^{-5}$ | $5 \times 10^{-12}$ ( $2 \times 10^{-12}$ , $8 \times 10^{-12}$ ) $p=2 \times 10^{-3}$ | 0.37       |
| Total lipids (mmol/l)                                    | $1 \times 10^{-3}$ ( $8 \times 10^{-4}$ , $2 \times 10^{-3}$ ) $p=3 \times 10^{-5}$     | $1 \times 10^{-3}$ ( $4 \times 10^{-4}$ , $2 \times 10^{-3}$ ) $p=3 \times 10^{-3}$    | 0.38       |
| Phospholipids (mmol/l)                                   | $2 \times 10^{-4}$ ( $9 \times 10^{-5}$ , $3 \times 10^{-4}$ ) $p=5 \times 10^{-5}$     | $1 \times 10^{-4}$ ( $4 \times 10^{-5}$ , $2 \times 10^{-4}$ ) $p=3 \times 10^{-3}$    | 0.40       |
| Total cholesterol (mmol/l)                               | $3 \times 10^{-4}$ ( $1 \times 10^{-4}$ , $4 \times 10^{-4}$ ) $p=2 \times 10^{-5}$     | $2 \times 10^{-4}$ ( $8 \times 10^{-5}$ , $3 \times 10^{-4}$ ) $p=1 \times 10^{-3}$    | 0.43       |
| Cholesterol esters (mmol/l)                              | $1 \times 10^{-4}$ ( $8 \times 10^{-5}$ , $2 \times 10^{-4}$ ) $p=2 \times 10^{-5}$     | $1 \times 10^{-4}$ ( $5 \times 10^{-5}$ , $2 \times 10^{-4}$ ) $p=1 \times 10^{-3}$    | 0.45       |
| Free cholesterol (mmol/l)                                | $1 \times 10^{-4}$ ( $6 \times 10^{-5}$ , $2 \times 10^{-4}$ ) $p=5 \times 10^{-5}$     | $9 \times 10^{-5}$ ( $3 \times 10^{-5}$ , $1 \times 10^{-4}$ ) $p=3 \times 10^{-3}$    | 0.43       |
| Triglycerides (mmol/l)                                   | $1 \times 10^{-3}$ ( $6 \times 10^{-4}$ , $2 \times 10^{-3}$ ) $p=4 \times 10^{-5}$     | $8 \times 10^{-4}$ ( $3 \times 10^{-4}$ , $1 \times 10^{-3}$ ) $p=3 \times 10^{-3}$    | 0.36       |
| <i>Very large VLDL</i>                                   |                                                                                         |                                                                                        |            |
| Particle concentration (mol/l)                           | $4 \times 10^{-11}$ ( $2 \times 10^{-11}$ , $6 \times 10^{-11}$ ) $p=2 \times 10^{-5}$  | $3 \times 10^{-11}$ ( $1 \times 10^{-11}$ , $5 \times 10^{-11}$ ) $p=7 \times 10^{-4}$ | 0.46       |
| Total lipids (mmol/l)                                    | $4 \times 10^{-3}$ ( $2 \times 10^{-3}$ , 0.01) $p=2 \times 10^{-5}$                    | $3 \times 10^{-3}$ ( $1 \times 10^{-3}$ , $5 \times 10^{-3}$ ) $p=7 \times 10^{-4}$    | 0.47       |
| Phospholipids (mmol/l)                                   | $6 \times 10^{-4}$ ( $3 \times 10^{-4}$ , $9 \times 10^{-4}$ ) $p=2 \times 10^{-5}$     | $5 \times 10^{-4}$ ( $2 \times 10^{-4}$ , $8 \times 10^{-4}$ ) $p=9 \times 10^{-4}$    | 0.50       |
| Total cholesterol (mmol/l)                               | $8 \times 10^{-4}$ ( $4 \times 10^{-4}$ , $1 \times 10^{-3}$ ) $p=1 \times 10^{-5}$     | $6 \times 10^{-4}$ ( $2 \times 10^{-4}$ , $9 \times 10^{-4}$ ) $p=1 \times 10^{-3}$    | 0.38       |
| Cholesterol esters (mmol/l)                              | $4 \times 10^{-4}$ ( $2 \times 10^{-4}$ , $6 \times 10^{-4}$ ) $p=5 \times 10^{-6}$     | $3 \times 10^{-4}$ ( $1 \times 10^{-4}$ , $5 \times 10^{-4}$ ) $p=9 \times 10^{-4}$    | 0.34       |
| Free cholesterol (mmol/l)                                | $4 \times 10^{-4}$ ( $2 \times 10^{-4}$ , $5 \times 10^{-4}$ ) $p=3 \times 10^{-5}$     | $3 \times 10^{-4}$ ( $1 \times 10^{-4}$ , $4 \times 10^{-4}$ ) $p=2 \times 10^{-3}$    | 0.43       |
| Triglycerides (mmol/l)                                   | $2 \times 10^{-3}$ ( $1 \times 10^{-3}$ , $3 \times 10^{-3}$ ) $p=2 \times 10^{-5}$     | $2 \times 10^{-3}$ ( $8 \times 10^{-4}$ , $3 \times 10^{-3}$ ) $p=6 \times 10^{-4}$    | 0.50       |
| <i>Large VLDL</i>                                        |                                                                                         |                                                                                        |            |
| Particle concentration (mol/l)                           | $2 \times 10^{-10}$ ( $1 \times 10^{-10}$ , $3 \times 10^{-10}$ ) $p=1 \times 10^{-5}$  | $2 \times 10^{-10}$ ( $8 \times 10^{-11}$ , $3 \times 10^{-10}$ ) $p=2 \times 10^{-4}$ | 0.62       |
| Total lipids (mmol/l)                                    | 0.01 (0.01, 0.02) $p=1 \times 10^{-5}$                                                  | 0.01 ( $5 \times 10^{-3}$ , 0.02) $p=2 \times 10^{-4}$                                 | 0.58       |
| Phospholipids (mmol/l)                                   | $2 \times 10^{-3}$ ( $1 \times 10^{-3}$ , $3 \times 10^{-3}$ ) $p=2 \times 10^{-5}$     | $2 \times 10^{-3}$ ( $8 \times 10^{-4}$ , $3 \times 10^{-3}$ ) $p=2 \times 10^{-4}$    | 0.61       |
| Total cholesterol (mmol/l)                               | $3 \times 10^{-3}$ ( $2 \times 10^{-3}$ , $4 \times 10^{-3}$ ) $p=8 \times 10^{-6}$     | $2 \times 10^{-3}$ ( $1 \times 10^{-3}$ , $4 \times 10^{-3}$ ) $p=2 \times 10^{-4}$    | 0.54       |
| Cholesterol esters (mmol/l)                              | $1 \times 10^{-3}$ ( $8 \times 10^{-4}$ , $2 \times 10^{-3}$ ) $p=6 \times 10^{-6}$     | $1 \times 10^{-3}$ ( $5 \times 10^{-4}$ , $2 \times 10^{-3}$ ) $p=2 \times 10^{-4}$    | 0.49       |
| Free cholesterol (mmol/l)                                | $1 \times 10^{-3}$ ( $8 \times 10^{-4}$ , $2 \times 10^{-3}$ ) $p=2 \times 10^{-5}$     | $1 \times 10^{-3}$ ( $5 \times 10^{-4}$ , $2 \times 10^{-3}$ ) $p=3 \times 10^{-4}$    | 0.58       |
| Triglycerides (mmol/l)                                   | 0.01 ( $4 \times 10^{-3}$ , 0.01) $p=2 \times 10^{-5}$                                  | 0.01 ( $3 \times 10^{-3}$ , 0.01) $p=2 \times 10^{-4}$                                 | 0.60       |
| <i>Medium VLDL</i>                                       |                                                                                         |                                                                                        |            |
| Particle concentration (mol/l)                           | $5 \times 10^{-10}$ ( $3 \times 10^{-10}$ , $7 \times 10^{-10}$ ) $p=6 \times 10^{-6}$  | $4 \times 10^{-10}$ ( $2 \times 10^{-10}$ , $6 \times 10^{-10}$ ) $p=2 \times 10^{-4}$ | 0.53       |
| Total lipids (mmol/l)                                    | 0.02 (0.01, 0.02) $p=5 \times 10^{-6}$                                                  | 0.01 (0.01, 0.02) $p=2 \times 10^{-4}$                                                 | 0.51       |
| Phospholipids (mmol/l)                                   | $3 \times 10^{-3}$ ( $2 \times 10^{-3}$ , $5 \times 10^{-3}$ ) $p=9.7 \times 10^{-6}$   | $3 \times 10^{-3}$ ( $1 \times 10^{-3}$ , $4 \times 10^{-3}$ ) $p=2 \times 10^{-4}$    | 0.56       |
| Total cholesterol (mmol/l)                               | $5 \times 10^{-3}$ ( $3 \times 10^{-3}$ , 0.01) $p=9.8 \times 10^{-6}$                  | $4 \times 10^{-3}$ ( $2 \times 10^{-3}$ , 0.01) $p=3 \times 10^{-4}$                   | 0.53       |
| Cholesterol esters (mmol/l)                              | $3 \times 10^{-3}$ ( $1 \times 10^{-3}$ , $4 \times 10^{-3}$ ) $p=1 \times 10^{-5}$     | $2 \times 10^{-3}$ ( $8 \times 10^{-4}$ , $3 \times 10^{-3}$ ) $p=6 \times 10^{-4}$    | 0.48       |
| Free cholesterol (mmol/l)                                | $2 \times 10^{-3}$ ( $1 \times 10^{-3}$ , $3 \times 10^{-3}$ ) $p=2 \times 10^{-5}$     | $2 \times 10^{-3}$ ( $8 \times 10^{-4}$ , $3 \times 10^{-3}$ ) $p=3 \times 10^{-4}$    | 0.61       |
| Triglycerides (mmol/l)                                   | 0.01 (0.01, 0.01) $p=4 \times 10^{-6}$                                                  | 0.01 ( $4 \times 10^{-3}$ , 0.01) $p=2 \times 10^{-4}$                                 | 0.49       |
| <i>Small VLDL</i>                                        |                                                                                         |                                                                                        |            |
| Particle concentration (mol/l)                           | $5 \times 10^{-10}$ ( $3 \times 10^{-10}$ , $7 \times 10^{-10}$ ) $p=1 \times 10^{-5}$  | $4 \times 10^{-10}$ ( $2 \times 10^{-10}$ , $7 \times 10^{-10}$ ) $p=2 \times 10^{-4}$ | 0.64       |
| Total lipids (mmol/l)                                    | 0.01 (0.01, 0.02) $p=9 \times 10^{-6}$                                                  | 0.01 ( $4 \times 10^{-3}$ , 0.01) $p=4 \times 10^{-4}$                                 | 0.53       |
| Phospholipids (mmol/l)                                   | $2 \times 10^{-3}$ ( $1 \times 10^{-3}$ , $3 \times 10^{-3}$ ) $p=9 \times 10^{-6}$     | $2 \times 10^{-3}$ ( $9.7 \times 10^{-4}$ , $3 \times 10^{-3}$ ) $p=1 \times 10^{-4}$  | 0.74       |
| Total cholesterol (mmol/l)                               | $4 \times 10^{-3}$ ( $2 \times 10^{-3}$ , 0.01) $p=4 \times 10^{-5}$                    | $3 \times 10^{-3}$ ( $7 \times 10^{-4}$ , $5 \times 10^{-3}$ ) $p=0.01$                | 0.30       |
| Cholesterol esters (mmol/l)                              | $3 \times 10^{-3}$ ( $1 \times 10^{-3}$ , $4 \times 10^{-3}$ ) $p=8 \times 10^{-5}$     | $1 \times 10^{-3}$ ( $8 \times 10^{-5}$ , $3 \times 10^{-3}$ ) $p=0.04$                | 0.18       |
| Free cholesterol (mmol/l)                                | $1 \times 10^{-3}$ ( $7 \times 10^{-4}$ , $2 \times 10^{-3}$ ) $p=5 \times 10^{-5}$     | $1 \times 10^{-3}$ ( $5 \times 10^{-4}$ , $2 \times 10^{-3}$ ) $p=6 \times 10^{-4}$    | 0.72       |
| Triglycerides (mmol/l)                                   | $5 \times 10^{-3}$ ( $2 \times 10^{-3}$ , 0.01) $p=3 \times 10^{-5}$                    | $4 \times 10^{-3}$ ( $2 \times 10^{-3}$ , 0.01) $p=2 \times 10^{-4}$                   | 0.75       |
| <i>Very Small VLDL</i>                                   |                                                                                         |                                                                                        |            |
| Particle concentration (mol/l)                           | $2 \times 10^{-10}$ ( $1 \times 10^{-11}$ , $4 \times 10^{-10}$ ) $p=0.04$              | $2 \times 10^{-10}$ ( $-1 \times 10^{-11}$ , $4 \times 10^{-10}$ ) $p=0.06$            | 0.96       |
| Total lipids (mmol/l)                                    | $4 \times 10^{-3}$ ( $8 \times 10^{-4}$ , 0.01) $p=0.01$                                | $3 \times 10^{-3}$ ( $-9 \times 10^{-4}$ , 0.01) $p=0.14$                              | 0.51       |
| Phospholipids (mmol/l)                                   | $8 \times 10^{-4}$ ( $-2 \times 10^{-4}$ , $2 \times 10^{-3}$ ) $p=0.12$                | $6 \times 10^{-4}$ ( $-5 \times 10^{-4}$ , $2 \times 10^{-3}$ ) $p=0.32$               | 0.74       |
| Total cholesterol (mmol/l)                               | $2 \times 10^{-3}$ ( $3 \times 10^{-4}$ , $4 \times 10^{-3}$ ) $p=0.02$                 | $6 \times 10^{-4}$ ( $-1 \times 10^{-3}$ , $3 \times 10^{-3}$ ) $p=0.51$               | 0.21       |
| Cholesterol esters (mmol/l)                              | $2 \times 10^{-3}$ ( $6 \times 10^{-4}$ , $3 \times 10^{-3}$ ) $p=5 \times 10^{-3}$     | $5 \times 10^{-4}$ ( $-8 \times 10^{-4}$ , $2 \times 10^{-3}$ ) $p=0.46$               | 0.12       |
| Free cholesterol (mmol/l)                                | $3 \times 10^{-4}$ ( $-3 \times 10^{-4}$ , $8 \times 10^{-4}$ ) $p=0.32$                | $1 \times 10^{-4}$ ( $-5 \times 10^{-4}$ , $7 \times 10^{-4}$ ) $p=0.68$               | 0.68       |
| Triglycerides (mmol/l)                                   | $1 \times 10^{-3}$ ( $3 \times 10^{-4}$ , $2 \times 10^{-3}$ ) $p=0.01$                 | $1 \times 10^{-3}$ ( $5 \times 10^{-4}$ , $2 \times 10^{-3}$ ) $p=1 \times 10^{-3}$    | 0.60       |
| <i>IDL</i>                                               |                                                                                         |                                                                                        |            |
| Particle concentration (mol/l)                           | $2 \times 10^{-10}$ ( $-3 \times 10^{-10}$ , $8 \times 10^{-10}$ ) $p=0.41$             | $4 \times 10^{-11}$ ( $-5 \times 10^{-10}$ , $6 \times 10^{-10}$ ) $p=0.88$            | 0.64       |
| Total lipids (mmol/l)                                    | $4 \times 10^{-3}$ ( $-3 \times 10^{-3}$ , 0.01) $p=0.26$                               | $1 \times 10^{-3}$ (-0.01, 0.01) $p=0.80$                                              | 0.54       |
| Phospholipids (mmol/l)                                   | $7 \times 10^{-4}$ ( $-1 \times 10^{-3}$ , $2 \times 10^{-3}$ ) $p=0.45$                | $-4 \times 10^{-5}$ ( $-2 \times 10^{-3}$ , $2 \times 10^{-3}$ ) $p=0.96$              | 0.56       |
| Total cholesterol (mmol/l)                               | $4 \times 10^{-3}$ ( $-1 \times 10^{-3}$ , 0.01) $p=0.15$                               | $3 \times 10^{-4}$ ( $-5 \times 10^{-3}$ , 0.01) $p=0.91$                              | 0.35       |

S5 Table. ALSPAC: offspring lipoproteins, lipids and metabolites absolute concentration differences per 1-SD higher parental BMI.

| Avon Longitudinal Study of Parents and Children (ALSPAC) |                                                                                        |                                                                                        |            |
|----------------------------------------------------------|----------------------------------------------------------------------------------------|----------------------------------------------------------------------------------------|------------|
| Metabolites                                              | mother                                                                                 | father                                                                                 | $P_{boot}$ |
| Cholesterol esters (mmol/l)                              | $3 \times 10^{-3}$ ( $-2 \times 10^{-4}$ , 0.01) $p=0.06$                              | $7 \times 10^{-4}$ ( $-3 \times 10^{-3}$ , $5 \times 10^{-3}$ ) $p=0.71$               | 0.29       |
| Free cholesterol (mmol/l)                                | $2 \times 10^{-4}$ ( $-1 \times 10^{-3}$ , $2 \times 10^{-3}$ ) $p=0.74$               | $-4 \times 10^{-4}$ ( $-2 \times 10^{-3}$ , $1 \times 10^{-3}$ ) $p=0.60$              | 0.52       |
| Triglycerides (mmol/l)                                   | $-1 \times 10^{-4}$ ( $-9 \times 10^{-4}$ , $7 \times 10^{-4}$ ) $p=0.79$              | $7 \times 10^{-4}$ ( $-1 \times 10^{-4}$ , $2 \times 10^{-3}$ ) $p=0.10$               | 0.16       |
| <b>Large LDL</b>                                         |                                                                                        |                                                                                        |            |
| Particle concentration (mol/l)                           | $6 \times 10^{-10}$ ( $-4 \times 10^{-10}$ , $2 \times 10^{-9}$ ) $p=0.23$             | $2 \times 10^{-10}$ ( $-8 \times 10^{-10}$ , $1 \times 10^{-9}$ ) $p=0.68$             | 0.59       |
| Total lipids (mmol/l)                                    | 0.01 ( $-3 \times 10^{-3}$ , 0.01) $p=0.21$                                            | $2 \times 10^{-3}$ (-0.01, 0.01) $p=0.70$                                              | 0.56       |
| Phospholipids (mmol/l)                                   | $2 \times 10^{-3}$ ( $-3 \times 10^{-4}$ , $3 \times 10^{-3}$ ) $p=0.10$               | $6 \times 10^{-4}$ ( $-1 \times 10^{-3}$ , $3 \times 10^{-3}$ ) $p=0.53$               | 0.49       |
| Total cholesterol (mmol/l)                               | $4 \times 10^{-3}$ ( $-2 \times 10^{-3}$ , 0.01) $p=0.18$                              | $7 \times 10^{-4}$ (-0.01, 0.01) $p=0.84$                                              | 0.42       |
| Cholesterol esters (mmol/l)                              | $4 \times 10^{-3}$ ( $-1 \times 10^{-3}$ , 0.01) $p=0.12$                              | $9.5 \times 10^{-4}$ ( $-4 \times 10^{-3}$ , 0.01) $p=0.73$                            | 0.41       |
| Free cholesterol (mmol/l)                                | $6 \times 10^{-4}$ ( $-1 \times 10^{-3}$ , $2 \times 10^{-3}$ ) $p=0.49$               | $-2 \times 10^{-4}$ ( $-2 \times 10^{-3}$ , $1 \times 10^{-3}$ ) $p=0.80$              | 0.48       |
| Triglycerides (mmol/l)                                   | $-3 \times 10^{-4}$ ( $-1 \times 10^{-3}$ , $5 \times 10^{-4}$ ) $p=0.46$              | $5 \times 10^{-4}$ ( $-4 \times 10^{-4}$ , $1 \times 10^{-3}$ ) $p=0.26$               | 0.17       |
| <b>Medium LDL</b>                                        |                                                                                        |                                                                                        |            |
| Particle concentration (mol/l)                           | $7 \times 10^{-10}$ ( $-1 \times 10^{-10}$ , $2 \times 10^{-9}$ ) $p=0.09$             | $4 \times 10^{-10}$ ( $-5 \times 10^{-10}$ , $1 \times 10^{-9}$ ) $p=0.44$             | 0.55       |
| Total lipids (mmol/l)                                    | $4 \times 10^{-3}$ ( $-1 \times 10^{-3}$ , 0.01) $p=0.12$                              | $2 \times 10^{-3}$ ( $-4 \times 10^{-3}$ , 0.01) $p=0.54$                              | 0.53       |
| Phospholipids (mmol/l)                                   | $1 \times 10^{-3}$ ( $2 \times 10^{-4}$ , $2 \times 10^{-3}$ ) $p=0.02$                | $7 \times 10^{-4}$ ( $-5 \times 10^{-4}$ , $2 \times 10^{-3}$ ) $p=0.25$               | 0.47       |
| Total cholesterol (mmol/l)                               | $3 \times 10^{-3}$ ( $-8 \times 10^{-4}$ , 0.01) $p=0.12$                              | $9 \times 10^{-4}$ ( $-4 \times 10^{-3}$ , 0.01) $p=0.70$                              | 0.42       |
| Cholesterol esters (mmol/l)                              | $3 \times 10^{-3}$ ( $-6 \times 10^{-4}$ , 0.01) $p=0.11$                              | $8 \times 10^{-4}$ ( $-3 \times 10^{-3}$ , $4 \times 10^{-3}$ ) $p=0.66$               | 0.43       |
| Free cholesterol (mmol/l)                                | $5 \times 10^{-4}$ ( $-2 \times 10^{-4}$ , $1 \times 10^{-3}$ ) $p=0.17$               | $6 \times 10^{-5}$ ( $-8 \times 10^{-4}$ , $9 \times 10^{-4}$ ) $p=0.89$               | 0.39       |
| Triglycerides (mmol/l)                                   | $-1 \times 10^{-4}$ ( $-6 \times 10^{-4}$ , $4 \times 10^{-4}$ ) $p=0.60$              | $3 \times 10^{-4}$ ( $-2 \times 10^{-4}$ , $8 \times 10^{-4}$ ) $p=0.29$               | 0.23       |
| <b>Small LDL</b>                                         |                                                                                        |                                                                                        |            |
| Particle concentration (mol/l)                           | $8 \times 10^{-10}$ ( $-1 \times 10^{-10}$ , $2 \times 10^{-9}$ ) $p=0.09$             | $3 \times 10^{-10}$ ( $-7 \times 10^{-10}$ , $1 \times 10^{-9}$ ) $p=0.55$             | 0.45       |
| Total lipids (mmol/l)                                    | $3 \times 10^{-3}$ ( $-5 \times 10^{-4}$ , 0.01) $p=0.09$                              | $9.9 \times 10^{-4}$ ( $-3 \times 10^{-3}$ , $5 \times 10^{-3}$ ) $p=0.60$             | 0.43       |
| Phospholipids (mmol/l)                                   | $8 \times 10^{-4}$ ( $3 \times 10^{-5}$ , $1 \times 10^{-3}$ ) $p=0.04$                | $3 \times 10^{-4}$ ( $-5 \times 10^{-4}$ , $1 \times 10^{-3}$ ) $p=0.43$               | 0.41       |
| Total cholesterol (mmol/l)                               | $2 \times 10^{-3}$ ( $-5 \times 10^{-4}$ , $4 \times 10^{-3}$ ) $p=0.12$               | $3 \times 10^{-4}$ ( $-2 \times 10^{-3}$ , $3 \times 10^{-3}$ ) $p=0.83$               | 0.35       |
| Cholesterol esters (mmol/l)                              | $2 \times 10^{-3}$ ( $-4 \times 10^{-4}$ , $4 \times 10^{-3}$ ) $p=0.12$               | $3 \times 10^{-4}$ ( $-2 \times 10^{-3}$ , $3 \times 10^{-3}$ ) $p=0.78$               | 0.38       |
| Free cholesterol (mmol/l)                                | $3 \times 10^{-4}$ ( $-1 \times 10^{-4}$ , $8 \times 10^{-4}$ ) $p=0.15$               | $-9.9 \times 10^{-6}$ ( $-5 \times 10^{-4}$ , $5 \times 10^{-4}$ ) $p=0.97$            | 0.28       |
| Triglycerides (mmol/l)                                   | $2 \times 10^{-4}$ ( $-8 \times 10^{-5}$ , $5 \times 10^{-4}$ ) $p=0.15$               | $4 \times 10^{-4}$ ( $3 \times 10^{-5}$ , $7 \times 10^{-4}$ ) $p=0.03$                | 0.53       |
| <b>Very large HDL</b>                                    |                                                                                        |                                                                                        |            |
| Particle concentration (mol/l)                           | $-1 \times 10^{-8}$ ( $-1 \times 10^{-8}$ , $-6 \times 10^{-9}$ ) $p=6 \times 10^{-7}$ | $-9 \times 10^{-9}$ ( $-1 \times 10^{-8}$ , $-4 \times 10^{-9}$ ) $p=2 \times 10^{-4}$ | 0.48       |
| Total lipids (mmol/l)                                    | -0.01 (-0.02, -0.01) $p=1 \times 10^{-6}$                                              | -0.01 (-0.02, -0.01) $p=7 \times 10^{-5}$                                              | 0.68       |
| Phospholipids (mmol/l)                                   | -0.01 (-0.01, $-4 \times 10^{-3}$ ) $p=3 \times 10^{-7}$                               | -0.01 (-0.01, $-2 \times 10^{-3}$ ) $p=4 \times 10^{-4}$                               | 0.30       |
| Total cholesterol (mmol/l)                               | -0.01 (-0.01, $-3 \times 10^{-3}$ ) $p=2 \times 10^{-5}$                               | -0.01 (-0.01, $-3 \times 10^{-3}$ ) $p=3 \times 10^{-5}$                               | 0.79       |
| Cholesterol esters (mmol/l)                              | $-4 \times 10^{-3}$ (-0.01, $-2 \times 10^{-3}$ ) $p=9 \times 10^{-5}$                 | $-4 \times 10^{-3}$ (-0.01, $-2 \times 10^{-3}$ ) $p=2 \times 10^{-5}$                 | 0.62       |
| Free cholesterol (mmol/l)                                | $-2 \times 10^{-3}$ ( $-2 \times 10^{-3}$ , $-9 \times 10^{-4}$ ) $p=2 \times 10^{-6}$ | $-1 \times 10^{-3}$ ( $-2 \times 10^{-3}$ , $-7 \times 10^{-4}$ ) $p=1 \times 10^{-4}$ | 0.70       |
| Triglycerides (mmol/l)                                   | $-2 \times 10^{-4}$ ( $-3 \times 10^{-4}$ , $1 \times 10^{-5}$ ) $p=0.06$              | $-8 \times 10^{-5}$ ( $-3 \times 10^{-4}$ , $1 \times 10^{-4}$ ) $p=0.38$              | 0.50       |
| <b>Large HDL</b>                                         |                                                                                        |                                                                                        |            |
| Particle concentration (mol/l)                           | $-2 \times 10^{-8}$ ( $-3 \times 10^{-8}$ , $-1 \times 10^{-8}$ ) $p=3 \times 10^{-6}$ | $-1 \times 10^{-8}$ ( $-2 \times 10^{-8}$ , $-4 \times 10^{-9}$ ) $p=0.01$             | 0.16       |
| Total lipids (mmol/l)                                    | -0.02 (-0.02, -0.01) $p=2 \times 10^{-6}$                                              | -0.01 (-0.02, $-3 \times 10^{-3}$ ) $p=0.01$                                           | 0.16       |
| Phospholipids (mmol/l)                                   | -0.01 (-0.01, $-3 \times 10^{-3}$ ) $p=3 \times 10^{-5}$                               | $-4 \times 10^{-3}$ (-0.01, $-6 \times 10^{-4}$ ) $p=0.02$                             | 0.19       |
| Total cholesterol (mmol/l)                               | -0.01 (-0.01, -0.01) $p=3 \times 10^{-7}$                                              | -0.01 (-0.01, $-2 \times 10^{-3}$ ) $p=2 \times 10^{-3}$                               | 0.14       |
| Cholesterol esters (mmol/l)                              | -0.01 (-0.01, $-5 \times 10^{-3}$ ) $p=3 \times 10^{-7}$                               | $-5 \times 10^{-3}$ (-0.01, $-2 \times 10^{-3}$ ) $p=2 \times 10^{-3}$                 | 0.14       |
| Free cholesterol (mmol/l)                                | $-2 \times 10^{-3}$ ( $-3 \times 10^{-3}$ , $-1 \times 10^{-3}$ ) $p=8 \times 10^{-7}$ | $-1 \times 10^{-3}$ ( $-2 \times 10^{-3}$ , $-5 \times 10^{-4}$ ) $p=2 \times 10^{-3}$ | 0.18       |
| Triglycerides (mmol/l)                                   | $-4 \times 10^{-5}$ ( $-2 \times 10^{-4}$ , $9.6 \times 10^{-5}$ ) $p=0.58$            | $2 \times 10^{-5}$ ( $-1 \times 10^{-4}$ , $2 \times 10^{-4}$ ) $p=0.76$               | 0.52       |
| <b>Medium HDL</b>                                        |                                                                                        |                                                                                        |            |
| Particle concentration (mol/l)                           | $1 \times 10^{-9}$ ( $-7 \times 10^{-9}$ , $9 \times 10^{-9}$ ) $p=0.76$               | $6 \times 10^{-9}$ ( $-2 \times 10^{-9}$ , $1 \times 10^{-8}$ ) $p=0.16$               | 0.35       |
| Total lipids (mmol/l)                                    | $-1 \times 10^{-4}$ ( $-4 \times 10^{-3}$ , $4 \times 10^{-3}$ ) $p=0.95$              | $2 \times 10^{-3}$ ( $-2 \times 10^{-3}$ , 0.01) $p=0.30$                              | 0.36       |
| Phospholipids (mmol/l)                                   | $-6 \times 10^{-4}$ ( $-3 \times 10^{-3}$ , $1 \times 10^{-3}$ ) $p=0.58$              | $9.8 \times 10^{-4}$ ( $-1 \times 10^{-3}$ , $3 \times 10^{-3}$ ) $p=0.38$             | 0.24       |
| Total cholesterol (mmol/l)                               | $-4 \times 10^{-4}$ ( $-2 \times 10^{-3}$ , $2 \times 10^{-3}$ ) $p=0.71$              | $4 \times 10^{-4}$ ( $-2 \times 10^{-3}$ , $2 \times 10^{-3}$ ) $p=0.68$               | 0.52       |
| Cholesterol esters (mmol/l)                              | $-4 \times 10^{-4}$ ( $-2 \times 10^{-3}$ , $1 \times 10^{-3}$ ) $p=0.66$              | $3 \times 10^{-4}$ ( $-1 \times 10^{-3}$ , $2 \times 10^{-3}$ ) $p=0.74$               | 0.54       |
| Free cholesterol (mmol/l)                                | $8 \times 10^{-6}$ ( $-3 \times 10^{-4}$ , $3 \times 10^{-4}$ ) $p=0.96$               | $1 \times 10^{-4}$ ( $-2 \times 10^{-4}$ , $5 \times 10^{-4}$ ) $p=0.43$               | 0.54       |
| Triglycerides (mmol/l)                                   | $8 \times 10^{-4}$ ( $5 \times 10^{-4}$ , $1 \times 10^{-3}$ ) $p=4 \times 10^{-6}$    | $8 \times 10^{-4}$ ( $4 \times 10^{-4}$ , $1 \times 10^{-3}$ ) $p=5 \times 10^{-6}$    | 0.90       |
| <b>Small HDL</b>                                         |                                                                                        |                                                                                        |            |
| Particle concentration (mol/l)                           | $2 \times 10^{-8}$ ( $6 \times 10^{-9}$ , $3 \times 10^{-8}$ ) $p=3 \times 10^{-3}$    | $2 \times 10^{-8}$ ( $9 \times 10^{-9}$ , $3 \times 10^{-8}$ ) $p=7 \times 10^{-4}$    | 0.70       |
| Total lipids (mmol/l)                                    | $3 \times 10^{-3}$ ( $-3 \times 10^{-4}$ , 0.01) $p=0.07$                              | 0.01 ( $1 \times 10^{-3}$ , 0.01) $p=0.01$                                             | 0.40       |

S5 Table. ALSPAC: offspring lipoproteins, lipids and metabolites absolute concentration differences per 1-SD higher parental BMI.

| Avon Longitudinal Study of Parents and Children (ALSPAC) |                                                                                        |                                                                                        |            |
|----------------------------------------------------------|----------------------------------------------------------------------------------------|----------------------------------------------------------------------------------------|------------|
| Metabolites                                              | mother                                                                                 | father                                                                                 | $P_{boot}$ |
| Phospholipids (mmol/l)                                   | $3 \times 10^{-3}$ ( $5 \times 10^{-4}$ , $5 \times 10^{-3}$ ) $p=0.01$                | $3 \times 10^{-3}$ ( $9.6 \times 10^{-4}$ , 0.01) $p=5 \times 10^{-3}$                 | 0.73       |
| Total cholesterol (mmol/l)                               | $-7 \times 10^{-7}$ ( $-2 \times 10^{-3}$ , $2 \times 10^{-3}$ ) $p=1.00$              | $1 \times 10^{-3}$ ( $-6 \times 10^{-4}$ , $3 \times 10^{-3}$ ) $p=0.20$               | 0.28       |
| Cholesterol esters (mmol/l)                              | $-1 \times 10^{-5}$ ( $-1 \times 10^{-3}$ , $1 \times 10^{-3}$ ) $p=0.98$              | $9 \times 10^{-4}$ ( $-7 \times 10^{-4}$ , $2 \times 10^{-3}$ ) $p=0.26$               | 0.33       |
| Free cholesterol (mmol/l)                                | $2 \times 10^{-5}$ ( $-4 \times 10^{-4}$ , $5 \times 10^{-4}$ ) $p=0.95$               | $3 \times 10^{-4}$ ( $-2 \times 10^{-4}$ , $8 \times 10^{-4}$ ) $p=0.20$               | 0.31       |
| Triglycerides (mmol/l)                                   | $5 \times 10^{-4}$ ( $2 \times 10^{-4}$ , $9 \times 10^{-4}$ ) $p=2 \times 10^{-3}$    | $7 \times 10^{-4}$ ( $4 \times 10^{-4}$ , $1 \times 10^{-3}$ ) $p=7 \times 10^{-5}$    | 0.47       |
| <b>Lipoprotein particle size</b>                         |                                                                                        |                                                                                        |            |
| VLDL particle size (nm)                                  | 0.10 (0.05, 0.14) $p=3 \times 10^{-5}$                                                 | 0.07 (0.03, 0.12) $p=9 \times 10^{-4}$                                                 | 0.37       |
| LDL particle size (nm)                                   | -0.01 (-0.01, $-3 \times 10^{-3}$ ) $p=2 \times 10^{-3}$                               | $-2 \times 10^{-3}$ (-0.01, $3 \times 10^{-3}$ ) $p=0.53$                              | 0.06       |
| HDL particle size (nm)                                   | -0.02 (-0.02, -0.01) $p=9 \times 10^{-8}$                                              | -0.01 (-0.02, -0.01) $p=3 \times 10^{-5}$                                              | 0.43       |
| <b>Cholesterol</b>                                       |                                                                                        |                                                                                        |            |
| Total cholesterol (mmol/l)                               | 0.01 (-0.01, 0.04) $p=0.30$                                                            | $2 \times 10^{-3}$ (-0.02, 0.03) $p=0.87$                                              | 0.54       |
| VLDL cholesterol (mmol/l)                                | 0.01 (0.01, 0.02) $p=1 \times 10^{-5}$                                                 | 0.01 ( $3 \times 10^{-3}$ , 0.02) $p=4 \times 10^{-3}$                                 | 0.31       |
| Remnant cholesterol (mmol/l)                             | 0.02 (0.01, 0.03) $p=7 \times 10^{-4}$                                                 | 0.01 ( $-8 \times 10^{-4}$ , 0.02) $p=0.07$                                            | 0.29       |
| LDL cholesterol (mmol/l)                                 | 0.01 ( $-3 \times 10^{-3}$ , 0.02) $p=0.15$                                            | $2 \times 10^{-3}$ (-0.01, 0.02) $p=0.79$                                              | 0.41       |
| HDL cholesterol (mmol/l)                                 | -0.02 (-0.02, -0.01) $p=2 \times 10^{-4}$                                              | -0.01 (-0.02, $-1 \times 10^{-3}$ ) $p=0.02$                                           | 0.34       |
| HDL <sub>2</sub> cholesterol (mmol/l)                    | -0.01 (-0.02, -0.01) $p=6 \times 10^{-5}$                                              | -0.01 (-0.01, $-2 \times 10^{-3}$ ) $p=0.01$                                           | 0.33       |
| HDL <sub>3</sub> cholesterol (mmol/l)                    | $-4 \times 10^{-3}$ (-0.01, $-1 \times 10^{-3}$ ) $p=3 \times 10^{-3}$                 | $-3 \times 10^{-3}$ (-0.01, $5 \times 10^{-4}$ ) $p=0.10$                              | 0.39       |
| Esterified cholesterol (mmol/l)                          | 0.01 (-0.01, 0.03) $p=0.29$                                                            | $-1 \times 10^{-3}$ (-0.02, 0.02) $p=0.91$                                             | 0.38       |
| Free cholesterol (mmol/l)                                | $3 \times 10^{-3}$ ( $-4 \times 10^{-3}$ , 0.01) $p=0.36$                              | $3 \times 10^{-3}$ ( $-5 \times 10^{-3}$ , 0.01) $p=0.40$                              | 0.99       |
| <b>Glycerides and phospholipids</b>                      |                                                                                        |                                                                                        |            |
| Triglycerides (mmol/l)                                   | 0.03 (0.01, 0.04) $p=1 \times 10^{-4}$                                                 | 0.03 (0.01, 0.04) $p=3 \times 10^{-4}$                                                 | 0.89       |
| VLDL triglycerides (mmol/l)                              | 0.03 (0.01, 0.04) $p=1 \times 10^{-5}$                                                 | 0.02 (0.01, 0.03) $p=2 \times 10^{-4}$                                                 | 0.61       |
| LDL triglycerides (mmol/l)                               | $-2 \times 10^{-4}$ ( $-2 \times 10^{-3}$ , $1 \times 10^{-3}$ ) $p=0.79$              | $1 \times 10^{-3}$ ( $-6 \times 10^{-4}$ , $3 \times 10^{-3}$ ) $p=0.19$               | 0.24       |
| HDL triglycerides (mmol/l)                               | $1 \times 10^{-3}$ ( $3 \times 10^{-4}$ , $2 \times 10^{-3}$ ) $p=0.01$                | $1 \times 10^{-3}$ ( $6 \times 10^{-4}$ , $2 \times 10^{-3}$ ) $p=9 \times 10^{-4}$    | 0.62       |
| Phosphoglycerides (mmol/l)                               | $2 \times 10^{-3}$ (-0.01, 0.01) $p=0.76$                                              | $4 \times 10^{-3}$ (-0.01, 0.01) $p=0.49$                                              | 0.73       |
| Phosphatidylcholine + other cholines (mmol/l)            | $8 \times 10^{-4}$ (-0.01, 0.01) $p=0.87$                                              | 0.01 ( $-4 \times 10^{-3}$ , 0.02) $p=0.22$                                            | 0.38       |
| Cholines (mmol/l)                                        | $-7 \times 10^{-4}$ (-0.01, 0.01) $p=0.90$                                             | $2 \times 10^{-3}$ (-0.01, 0.01) $p=0.78$                                              | 0.75       |
| <b>Apolipoproteins</b>                                   |                                                                                        |                                                                                        |            |
| Apolipoprotein A-I (g/l)                                 | $-5 \times 10^{-3}$ (-0.01, $-3 \times 10^{-4}$ ) $p=0.04$                             | $-3 \times 10^{-3}$ (-0.01, $2 \times 10^{-3}$ ) $p=0.27$                              | 0.52       |
| Apolipoprotein B (g/l)                                   | 0.01 ( $4 \times 10^{-3}$ , 0.01) $p=4 \times 10^{-4}$                                 | 0.01 ( $9 \times 10^{-4}$ , 0.01) $p=0.02$                                             | 0.42       |
| <b>Fatty acids</b>                                       |                                                                                        |                                                                                        |            |
| Total fatty acids (mmol/l)                               | 0.07 (0.01, 0.13) $p=0.02$                                                             | 0.07 (0.01, 0.14) $p=0.03$                                                             | 0.97       |
| Degree of unsaturation                                   | $-2 \times 10^{-3}$ ( $-4 \times 10^{-3}$ , $8 \times 10^{-4}$ ) $p=0.19$              | $-1 \times 10^{-3}$ ( $-4 \times 10^{-3}$ , $1 \times 10^{-3}$ ) $p=0.38$              | 0.76       |
| Docosahexaenoic acid (mmol/l)                            | $-1 \times 10^{-3}$ ( $-2 \times 10^{-3}$ , $9 \times 10^{-5}$ ) $p=0.07$              | $8 \times 10^{-4}$ ( $-6 \times 10^{-4}$ , $2 \times 10^{-3}$ ) $p=0.25$               | 0.03       |
| Linoleic acid (mmol/l)                                   | 0.02 ( $1 \times 10^{-4}$ , 0.03) $p=0.05$                                             | $-2 \times 10^{-5}$ (-0.02, 0.02) $p=1.00$                                             | 0.14       |
| n-3 fatty acids (mmol/l)                                 | $-3 \times 10^{-4}$ ( $-3 \times 10^{-3}$ , $2 \times 10^{-3}$ ) $p=0.81$              | $1 \times 10^{-3}$ ( $-2 \times 10^{-3}$ , $4 \times 10^{-3}$ ) $p=0.40$               | 0.41       |
| n-6 fatty acids (mmol/l)                                 | 0.02 ( $-1 \times 10^{-3}$ , 0.04) $p=0.07$                                            | $3 \times 10^{-3}$ (-0.02, 0.02) $p=0.73$                                              | 0.27       |
| PUFA (mmol/l)                                            | 0.02 ( $-4 \times 10^{-3}$ , 0.04) $p=0.12$                                            | $5 \times 10^{-3}$ (-0.02, 0.03) $p=0.68$                                              | 0.41       |
| MUFA (mmol/l)                                            | 0.03 (0.01, 0.06) $p=2 \times 10^{-3}$                                                 | 0.04 (0.02, 0.06) $p=8 \times 10^{-4}$                                                 | 0.72       |
| Saturated fatty acids (mmol/l)                           | 0.02 (-0.01, 0.04) $p=0.18$                                                            | 0.02 ( $-3 \times 10^{-3}$ , 0.05) $p=0.09$                                            | 0.76       |
| <b>Fatty acids ratios</b>                                |                                                                                        |                                                                                        |            |
| Docosahexaenoic acid (%)                                 | -0.02 (-0.03, -0.01) $p=4 \times 10^{-4}$                                              | $4 \times 10^{-4}$ (-0.01, 0.01) $p=0.95$                                              | 0.01       |
| Linoleic acid (%)                                        | -0.03 (-0.13, 0.07) $p=0.58$                                                           | -0.18 (-0.29, -0.08) $p=5 \times 10^{-4}$                                              | 0.01       |
| n-3 fatty acids (%)                                      | -0.03 (-0.05, $-4 \times 10^{-3}$ ) $p=0.02$                                           | -0.01 (-0.03, 0.02) $p=0.58$                                                           | 0.27       |
| n-6 fatty acids (%)                                      | -0.06 (-0.16, 0.04) $p=0.23$                                                           | -0.19 (-0.29, -0.09) $p=3 \times 10^{-4}$                                              | 0.06       |
| PUFA (%)                                                 | -0.09 (-0.19, 0.02) $p=0.09$                                                           | -0.20 (-0.31, -0.09) $p=3 \times 10^{-4}$                                              | 0.12       |
| MUFA (%)                                                 | 0.18 (0.07, 0.30) $p=2 \times 10^{-3}$                                                 | 0.23 (0.11, 0.36) $p=2 \times 10^{-4}$                                                 | 0.52       |
| Saturated fatty acids (%)                                | -0.09 (-0.17, $-4 \times 10^{-3}$ ) $p=0.04$                                           | -0.03 (-0.12, 0.05) $p=0.45$                                                           | 0.34       |
| <b>Glycolysis related metabolites</b>                    |                                                                                        |                                                                                        |            |
| Glucose (mmol/l)                                         | 0.02 ( $4 \times 10^{-4}$ , 0.04) $p=0.04$                                             | 0.01 (-0.01, 0.02) $p=0.51$                                                            | 0.34       |
| Lactate (mmol/l)                                         | $-6 \times 10^{-4}$ (-0.02, 0.02) $p=0.94$                                             | -0.01 (-0.03, $5 \times 10^{-3}$ ) $p=0.14$                                            | 0.25       |
| Pyruvate (mmol/l)                                        | $2 \times 10^{-3}$ ( $6 \times 10^{-4}$ , $3 \times 10^{-3}$ ) $p=4 \times 10^{-3}$    | $6 \times 10^{-4}$ ( $-7 \times 10^{-4}$ , $2 \times 10^{-3}$ ) $p=0.33$               | 0.16       |
| Citrate (mmol/l)                                         | $-2 \times 10^{-3}$ ( $-2 \times 10^{-3}$ , $-7 \times 10^{-4}$ ) $p=5 \times 10^{-4}$ | $-1 \times 10^{-3}$ ( $-2 \times 10^{-3}$ , $-4 \times 10^{-4}$ ) $p=5 \times 10^{-3}$ | 0.69       |
| <b>Amino acids</b>                                       |                                                                                        |                                                                                        |            |

S5 Table. ALSPAC: offspring lipoproteins, lipids and metabolites absolute concentration differences per 1-SD higher parental BMI.

| Avon Longitudinal Study of Parents and Children (ALSPAC) |                                                                                        |                                                                            |            |
|----------------------------------------------------------|----------------------------------------------------------------------------------------|----------------------------------------------------------------------------|------------|
| Metabolites                                              | mother                                                                                 | father                                                                     | $P_{boot}$ |
| Alanine (mmol/l)                                         | $5 \times 10^{-4}$ ( $-1 \times 10^{-3}$ , $3 \times 10^{-3}$ ) $p=0.62$               | $-7 \times 10^{-4}$ ( $-3 \times 10^{-3}$ , $1 \times 10^{-3}$ ) $p=0.53$  | 0.37       |
| Glutamine (mmol/l)                                       | $-6 \times 10^{-5}$ ( $-3 \times 10^{-3}$ , $3 \times 10^{-3}$ ) $p=0.96$              | $-3 \times 10^{-3}$ ( $-0.01$ , $-6 \times 10^{-4}$ ) $p=0.01$             | 0.06       |
| Histidine (mmol/l)                                       | $5 \times 10^{-4}$ ( $-2 \times 10^{-5}$ , $9.6 \times 10^{-4}$ ) $p=0.06$             | $4 \times 10^{-4}$ ( $-1 \times 10^{-4}$ , $10 \times 10^{-4}$ ) $p=0.11$  | 0.96       |
| <b>Branched-chain amino acids</b>                        |                                                                                        |                                                                            |            |
| Isoleucine (mmol/l)                                      | $1 \times 10^{-3}$ ( $5 \times 10^{-4}$ , $2 \times 10^{-3}$ ) $p=5 \times 10^{-5}$    | $6 \times 10^{-4}$ ( $9 \times 10^{-5}$ , $1 \times 10^{-3}$ ) $p=0.02$    | 0.16       |
| Leucine (mmol/l)                                         | $5 \times 10^{-4}$ ( $2 \times 10^{-4}$ , $9 \times 10^{-4}$ ) $p=4 \times 10^{-3}$    | $4 \times 10^{-4}$ ( $3 \times 10^{-5}$ , $8 \times 10^{-4}$ ) $p=0.03$    | 0.64       |
| Valine (mmol/l)                                          | $2 \times 10^{-3}$ ( $1 \times 10^{-3}$ , $3 \times 10^{-3}$ ) $p=6 \times 10^{-5}$    | $1 \times 10^{-3}$ ( $4 \times 10^{-4}$ , $3 \times 10^{-3}$ ) $p=0.01$    | 0.34       |
| <b>Aromatic amino acids</b>                              |                                                                                        |                                                                            |            |
| Phenylalanine (mmol/l)                                   | $3 \times 10^{-4}$ ( $5 \times 10^{-5}$ , $5 \times 10^{-4}$ ) $p=0.02$                | $1 \times 10^{-4}$ ( $-9.9 \times 10^{-5}$ , $3 \times 10^{-4}$ ) $p=0.28$ | 0.30       |
| Tyrosine (mmol/l)                                        | $7 \times 10^{-4}$ ( $3 \times 10^{-4}$ , $1 \times 10^{-3}$ ) $p=1 \times 10^{-3}$    | $3 \times 10^{-4}$ ( $-2 \times 10^{-4}$ , $7 \times 10^{-4}$ ) $p=0.19$   | 0.11       |
| <b>Ketone bodies</b>                                     |                                                                                        |                                                                            |            |
| Acetate (mmol/l)                                         | $-1 \times 10^{-3}$ ( $-2 \times 10^{-3}$ , $-5 \times 10^{-4}$ ) $p=2 \times 10^{-3}$ | $-9 \times 10^{-4}$ ( $-2 \times 10^{-3}$ , $1 \times 10^{-4}$ ) $p=0.09$  | 0.26       |
| Acetoacetate (mmol/l)                                    | $-1 \times 10^{-3}$ ( $-3 \times 10^{-3}$ , $-3 \times 10^{-5}$ ) $p=0.04$             | $4 \times 10^{-5}$ ( $-2 \times 10^{-3}$ , $2 \times 10^{-3}$ ) $p=0.96$   | 0.17       |
| Beta-hydroxybutyrate (mmol/l)                            | -0.01 ( $-0.01$ , $-2 \times 10^{-3}$ ) $p=0.01$                                       | $-2 \times 10^{-3}$ ( $-0.01$ , $3 \times 10^{-3}$ ) $p=0.39$              | 0.26       |
| <b>Fluid balance</b>                                     |                                                                                        |                                                                            |            |
| Creatinine (mmol/l)                                      | $4 \times 10^{-4}$ ( $-1 \times 10^{-5}$ , $7 \times 10^{-4}$ ) $p=0.06$               | $5 \times 10^{-4}$ ( $1 \times 10^{-4}$ , $9 \times 10^{-4}$ ) $p=0.01$    | 0.58       |
| Albumin (signal area)                                    | $-1 \times 10^{-4}$ ( $-3 \times 10^{-4}$ , $4 \times 10^{-5}$ ) $p=0.15$              | $-1 \times 10^{-5}$ ( $-2 \times 10^{-4}$ , $2 \times 10^{-4}$ ) $p=0.89$  | 0.37       |
| <b>Inflammation</b>                                      |                                                                                        |                                                                            |            |
| Glycoprotein acetyls (mmol/l)                            | 0.01 ( $4 \times 10^{-3}$ , 0.02) $p=5 \times 10^{-4}$                                 | 0.01 ( $3 \times 10^{-3}$ , 0.01) $p=2 \times 10^{-3}$                     | 0.70       |

Associations were adjusted for parental age, smoking, education, head of household social class, maternal parity, offspring's age at blood collection and sex. S5 Table correspond to the SD-scaled metabolite concentration shown in S3 Fig.
