# Supplementary material for: Association of pre-pregnancy body mass index with offspring metabolic profile: Analyses of 3 European prospective birth cohorts
Source: PubMed Central journal article supplement (PMC5568725; doi:10.1371/journal.pmed.1002376), 2017-08-22
Supplement: pmed.1002376.s013.pdf [file pmed.1002376.s013.pdf]

S6 Table. NFBC66 and NFBC86: offspring lipoproteins, lipids and metabolites absolute concentration differences per 1-SD higher parental BMI.

| Metabolites                                   | NFBC86                                                                     |                                                                            |            | NFBC66                                                                     |  |  |
|-----------------------------------------------|----------------------------------------------------------------------------|----------------------------------------------------------------------------|------------|----------------------------------------------------------------------------|--|--|
|                                               | mother                                                                     | father                                                                     | $P_{boot}$ | mother                                                                     |  |  |
| Phospholipids (mmol/l)                        | $9 \times 10^{-4}$ ( $-2 \times 10^{-3}$ , $4 \times 10^{-3}$ ) $p=0.56$   | $3 \times 10^{-3}$ ( $4 \times 10^{-4}$ , 0.01) $p=0.02$                   | 0.22       | $-6 \times 10^{-4}$ ( $-4 \times 10^{-3}$ , $3 \times 10^{-3}$ ) $p=0.71$  |  |  |
| Total cholesterol (mmol/l)                    | $9 \times 10^{-4}$ ( $-2 \times 10^{-3}$ , $4 \times 10^{-3}$ ) $p=0.52$   | $3 \times 10^{-3}$ ( $-8 \times 10^{-5}$ , 0.01) $p=0.06$                  | 0.35       | $-8 \times 10^{-4}$ ( $-4 \times 10^{-3}$ , $2 \times 10^{-3}$ ) $p=0.63$  |  |  |
| Cholesterol esters (mmol/l)                   | $1 \times 10^{-3}$ ( $-1 \times 10^{-3}$ , $3 \times 10^{-3}$ ) $p=0.41$   | $2 \times 10^{-3}$ ( $-2 \times 10^{-4}$ , $5 \times 10^{-3}$ ) $p=0.07$   | 0.46       | $-4 \times 10^{-4}$ ( $-3 \times 10^{-3}$ , $2 \times 10^{-3}$ ) $p=0.73$  |  |  |
| Free cholesterol (mmol/l)                     | $-8 \times 10^{-5}$ ( $-7 \times 10^{-4}$ , $6 \times 10^{-4}$ ) $p=0.81$  | $5 \times 10^{-4}$ ( $-9 \times 10^{-5}$ , $1 \times 10^{-3}$ ) $p=0.10$   | 0.16       | $-3 \times 10^{-4}$ ( $-1 \times 10^{-3}$ , $4 \times 10^{-4}$ ) $p=0.40$  |  |  |
| Triglycerides (mmol/l)                        | $4 \times 10^{-4}$ ( $-1 \times 10^{-5}$ , $9 \times 10^{-4}$ ) $p=0.06$   | $4 \times 10^{-4}$ ( $-5 \times 10^{-5}$ , $9 \times 10^{-4}$ ) $p=0.08$   | 0.91       | $6 \times 10^{-4}$ ( $-3 \times 10^{-5}$ , $1 \times 10^{-3}$ ) $p=0.06$   |  |  |
| <b>Lipoprotein particle size</b>              |                                                                            |                                                                            |            |                                                                            |  |  |
| VLDL particle size (nm)                       | 0.04 (-0.01, 0.08) $p=0.10$                                                | 0.05 ( $4 \times 10^{-3}$ , 0.09) $p=0.03$                                 | 0.72       | 0.04 ( $5 \times 10^{-3}$ , 0.07) $p=0.03$                                 |  |  |
| LDL particle size (nm)                        | $6 \times 10^{-4}$ (-0.01, 0.01) $p=0.85$                                  | -0.01 (-0.01, $5 \times 10^{-4}$ ) $p=0.07$                                | 0.16       | $-3 \times 10^{-5}$ ( $-4 \times 10^{-3}$ , $4 \times 10^{-3}$ ) $p=0.99$  |  |  |
| HDL particle size (nm)                        | -0.01 (-0.02, -0.01) $p=3 \times 10^{-4}$                                  | -0.02 (-0.03, -0.01) $p=4 \times 10^{-5}$                                  | 0.70       | -0.01 (-0.02, $-4 \times 10^{-3}$ ) $p=2 \times 10^{-3}$                   |  |  |
| <b>Cholesterol</b>                            |                                                                            |                                                                            |            |                                                                            |  |  |
| Total cholesterol (mmol/l)                    | $6 \times 10^{-4}$ (-0.03, 0.03) $p=0.97$                                  | 0.01 (-0.02, 0.04) $p=0.68$                                                | 0.80       | 0.02 (-0.02, 0.05) $p=0.43$                                                |  |  |
| VLDL cholesterol (mmol/l)                     | 0.01 ( $7 \times 10^{-5}$ , 0.02) $p=0.05$                                 | 0.01 ( $-3 \times 10^{-4}$ , 0.02) $p=0.06$                                | 0.86       | 0.01 ( $4 \times 10^{-3}$ , 0.02) $p=4 \times 10^{-3}$                     |  |  |
| Remnant cholesterol (mmol/l)                  | 0.01 ( $-2 \times 10^{-3}$ , 0.03) $p=0.10$                                | 0.01 ( $-4 \times 10^{-3}$ , 0.02) $p=0.16$                                | 0.82       | 0.02 ( $3 \times 10^{-3}$ , 0.03) $p=0.02$                                 |  |  |
| LDL cholesterol (mmol/l)                      | 0.01 (-0.01, 0.02) $p=0.50$                                                | 0.01 (-0.01, 0.02) $p=0.40$                                                | 0.89       | 0.01 (-0.01, 0.03) $p=0.20$                                                |  |  |
| HDL cholesterol (mmol/l)                      | -0.02 (-0.03, -0.01) $p=3 \times 10^{-3}$                                  | -0.01 (-0.02, $3 \times 10^{-4}$ ) $p=0.06$                                | 0.42       | -0.02 (-0.03, $-4 \times 10^{-3}$ ) $p=0.01$                               |  |  |
| HDL <sub>2</sub> cholesterol (mmol/l)         | -0.02 (-0.03, -0.01) $p=3 \times 10^{-3}$                                  | -0.01 (-0.02, $-6 \times 10^{-4}$ ) $p=0.04$                               | 0.48       | -0.02 (-0.03, $-4 \times 10^{-3}$ ) $p=0.01$                               |  |  |
| HDL <sub>3</sub> cholesterol (mmol/l)         | $-1 \times 10^{-3}$ ( $-3 \times 10^{-3}$ , $-7 \times 10^{-5}$ ) $p=0.04$ | $-4 \times 10^{-5}$ ( $-1 \times 10^{-3}$ , $1 \times 10^{-3}$ ) $p=0.95$  | 0.17       | $-4 \times 10^{-4}$ ( $-2 \times 10^{-3}$ , $1 \times 10^{-3}$ ) $p=0.67$  |  |  |
| Esterified cholesterol (mmol/l)               | $2 \times 10^{-4}$ (-0.02, 0.02) $p=0.99$                                  | 0.01 (-0.02, 0.03) $p=0.53$                                                | 0.66       | 0.01 (-0.01, 0.04) $p=0.32$                                                |  |  |
| Free cholesterol (mmol/l)                     | $5 \times 10^{-4}$ (-0.01, 0.01) $p=0.91$                                  | $-7 \times 10^{-4}$ (-0.01, 0.01) $p=0.88$                                 | 0.84       | $5 \times 10^{-3}$ (-0.01, 0.02) $p=0.40$                                  |  |  |
| <b>Glycerides and phospholipids</b>           |                                                                            |                                                                            |            |                                                                            |  |  |
| Triglycerides (mmol/l)                        | 0.02 ( $2 \times 10^{-3}$ , 0.03) $p=0.03$                                 | 0.02 ( $1 \times 10^{-3}$ , 0.03) $p=0.03$                                 | 0.93       | 0.02 ( $2 \times 10^{-4}$ , 0.04) $p=0.05$                                 |  |  |
| VLDL triglycerides (mmol/l)                   | 0.02 ( $2 \times 10^{-3}$ , 0.03) $p=0.02$                                 | 0.02 ( $4 \times 10^{-3}$ , 0.03) $p=0.01$                                 | 0.95       | 0.02 ( $2 \times 10^{-3}$ , 0.03) $p=0.03$                                 |  |  |
| LDL triglycerides (mmol/l)                    | $1 \times 10^{-4}$ ( $-2 \times 10^{-3}$ , $2 \times 10^{-3}$ ) $p=0.89$   | $-2 \times 10^{-4}$ ( $-2 \times 10^{-3}$ , $2 \times 10^{-3}$ ) $p=0.83$  | 0.79       | $1 \times 10^{-3}$ ( $-2 \times 10^{-3}$ , $4 \times 10^{-3}$ ) $p=0.41$   |  |  |
| HDL triglycerides (mmol/l)                    | $6 \times 10^{-4}$ ( $-8 \times 10^{-4}$ , $2 \times 10^{-3}$ ) $p=0.41$   | $-3 \times 10^{-5}$ ( $-1 \times 10^{-3}$ , $1 \times 10^{-3}$ ) $p=0.96$  | 0.51       | $7 \times 10^{-4}$ ( $-1 \times 10^{-3}$ , $3 \times 10^{-3}$ ) $p=0.51$   |  |  |
| Phosphoglycerides (mmol/l)                    | $-4 \times 10^{-3}$ (-0.02, 0.01) $p=0.53$                                 | $2 \times 10^{-3}$ (-0.01, 0.01) $p=0.77$                                  | 0.51       | $3 \times 10^{-3}$ (-0.01, 0.02) $p=0.74$                                  |  |  |
| Phosphatidylcholine + other cholines (mmol/l) | $-5 \times 10^{-3}$ (-0.02, 0.01) $p=0.41$                                 | $8 \times 10^{-4}$ (-0.01, 0.01) $p=0.89$                                  | 0.49       | $1 \times 10^{-3}$ (-0.01, 0.02) $p=0.88$                                  |  |  |
| Cholines (mmol/l)                             | $-5 \times 10^{-3}$ (-0.02, 0.01) $p=0.48$                                 | $1 \times 10^{-3}$ (-0.01, 0.01) $p=0.87$                                  | 0.53       | $2 \times 10^{-3}$ (-0.01, 0.02) $p=0.81$                                  |  |  |
| <b>Apolipoproteins</b>                        |                                                                            |                                                                            |            |                                                                            |  |  |
| Apolipoprotein A-I (g/l)                      | -0.01 (-0.01, $3 \times 10^{-4}$ ) $p=0.06$                                | $-3 \times 10^{-3}$ (-0.01, $4 \times 10^{-3}$ ) $p=0.41$                  | 0.44       | -0.01 (-0.02, $1 \times 10^{-3}$ ) $p=0.08$                                |  |  |
| Apolipoprotein B (g/l)                        | 0.01 ( $-8 \times 10^{-4}$ , 0.01) $p=0.09$                                | $5 \times 10^{-3}$ ( $-1 \times 10^{-3}$ , 0.01) $p=0.12$                  | 0.88       | 0.01 ( $5 \times 10^{-4}$ , 0.02) $p=0.04$                                 |  |  |
| <b>Fatty acids</b>                            |                                                                            |                                                                            |            |                                                                            |  |  |
| Total fatty acids (mmol/l)                    | 0.03 (-0.05, 0.10) $p=0.48$                                                | 0.04 (-0.03, 0.11) $p=0.27$                                                | 0.78       | 0.06 (-0.03, 0.15) $p=0.21$                                                |  |  |
| Degree of unsaturation                        | $-4 \times 10^{-4}$ ( $-2 \times 10^{-3}$ , $1 \times 10^{-3}$ ) $p=0.64$  | $8 \times 10^{-4}$ ( $-9 \times 10^{-4}$ , $3 \times 10^{-3}$ ) $p=0.34$   | 0.28       | $-3 \times 10^{-4}$ ( $-2 \times 10^{-3}$ , $1 \times 10^{-3}$ ) $p=0.75$  |  |  |
| Docosahexaenoic acid (mmol/l)                 | $2 \times 10^{-4}$ ( $-1 \times 10^{-3}$ , $2 \times 10^{-3}$ ) $p=0.82$   | $2 \times 10^{-3}$ ( $-2 \times 10^{-5}$ , $3 \times 10^{-3}$ ) $p=0.05$   | 0.21       | $1 \times 10^{-3}$ ( $-8 \times 10^{-4}$ , $3 \times 10^{-3}$ ) $p=0.24$   |  |  |
| Linoleic acid (mmol/l)                        | -0.01 (-0.02, 0.01) $p=0.45$                                               | 0.01 (-0.01, 0.02) $p=0.47$                                                | 0.28       | $-1 \times 10^{-3}$ (-0.02, 0.02) $p=0.92$                                 |  |  |
| n-3 fatty acids (mmol/l)                      | $9 \times 10^{-4}$ ( $-3 \times 10^{-3}$ , 0.01) $p=0.67$                  | $5 \times 10^{-3}$ ( $5 \times 10^{-4}$ , 0.01) $p=0.03$                   | 0.20       | $3 \times 10^{-3}$ ( $-2 \times 10^{-3}$ , 0.01) $p=0.25$                  |  |  |
| n-6 fatty acids (mmol/l)                      | -0.01 (-0.03, 0.02) $p=0.62$                                               | 0.01 (-0.01, 0.03) $p=0.43$                                                | 0.35       | $4 \times 10^{-3}$ (-0.02, 0.03) $p=0.75$                                  |  |  |
| PUFA (mmol/l)                                 | $-5 \times 10^{-3}$ (-0.03, 0.02) $p=0.72$                                 | 0.01 (-0.01, 0.04) $p=0.29$                                                | 0.30       | 0.01 (-0.02, 0.04) $p=0.64$                                                |  |  |
| MUFA (mmol/l)                                 | 0.02 (-0.01, 0.04) $p=0.13$                                                | 0.02 (-0.01, 0.04) $p=0.15$                                                | 0.96       | 0.02 (-0.01, 0.06) $p=0.12$                                                |  |  |
| Saturated fatty acids (mmol/l)                | 0.01 (-0.02, 0.04) $p=0.42$                                                | 0.01 (-0.02, 0.04) $p=0.54$                                                | 0.88       | 0.03 (-0.01, 0.06) $p=0.15$                                                |  |  |
| <b>Fatty acids ratios</b>                     |                                                                            |                                                                            |            |                                                                            |  |  |
| Docosahexaenoic acid (%)                      | $-9 \times 10^{-4}$ (-0.01, 0.01) $p=0.87$                                 | 0.01 ( $-2 \times 10^{-3}$ , 0.02) $p=0.10$                                | 0.17       | $4 \times 10^{-3}$ (-0.01, 0.01) $p=0.48$                                  |  |  |
| Linoleic acid (%)                             | -0.11 (-0.19, -0.04) $p=4 \times 10^{-3}$                                  | -0.02 (-0.10, 0.05) $p=0.54$                                               | 0.11       | -0.12 (-0.20, -0.04) $p=5 \times 10^{-3}$                                  |  |  |
| n-3 fatty acids (%)                           | $-3 \times 10^{-3}$ (-0.03, 0.02) $p=0.83$                                 | 0.03 ( $-1 \times 10^{-3}$ , 0.06) $p=0.06$                                | 0.09       | $3 \times 10^{-3}$ (-0.02, 0.03) $p=0.84$                                  |  |  |
| n-6 fatty acids (%)                           | -0.12 (-0.20, -0.03) $p=0.01$                                              | -0.03 (-0.11, 0.06) $p=0.52$                                               | 0.13       | -0.11 (-0.19, -0.02) $p=0.01$                                              |  |  |
| PUFA (%)                                      | -0.12 (-0.21, -0.03) $p=0.01$                                              | $3 \times 10^{-5}$ (-0.09, 0.09) $p=1.00$                                  | 0.07       | -0.10 (-0.20, -0.01) $p=0.03$                                              |  |  |
| MUFA (%)                                      | 0.11 (0.02, 0.20) $p=0.02$                                                 | 0.07 (-0.02, 0.16) $p=0.14$                                                | 0.55       | 0.07 (-0.01, 0.15) $p=0.07$                                                |  |  |
| Saturated fatty acids (%)                     | 0.01 (-0.07, 0.08) $p=0.83$                                                | -0.07 (-0.14, $2 \times 10^{-3}$ ) $p=0.06$                                | 0.13       | 0.03 (-0.02, 0.08) $p=0.27$                                                |  |  |
| <b>Glycolysis related metabolites</b>         |                                                                            |                                                                            |            |                                                                            |  |  |
| Glucose (mmol/l)                              | $-3 \times 10^{-3}$ (-0.02, 0.02) $p=0.78$                                 | 0.01 (-0.01, 0.03) $p=0.40$                                                | 0.36       | -0.01 (-0.03, 0.02) $p=0.61$                                               |  |  |
| Lactate (mmol/l)                              | $2 \times 10^{-3}$ (-0.01, 0.01) $p=0.71$                                  | $-3 \times 10^{-3}$ (-0.02, 0.01) $p=0.67$                                 | 0.56       | $2 \times 10^{-3}$ (-0.01, 0.02) $p=0.72$                                  |  |  |
| Pyruvate (mmol/l)                             | $-1 \times 10^{-4}$ ( $-9 \times 10^{-4}$ , $6 \times 10^{-4}$ ) $p=0.76$  | $-3 \times 10^{-4}$ ( $-1 \times 10^{-3}$ , $5 \times 10^{-4}$ ) $p=0.46$  | 0.76       | $3 \times 10^{-4}$ ( $-5 \times 10^{-4}$ , $1 \times 10^{-3}$ ) $p=0.45$   |  |  |
| Citrate (mmol/l)                              | $-9 \times 10^{-5}$ ( $-9 \times 10^{-4}$ , $7 \times 10^{-4}$ ) $p=0.82$  | $-1 \times 10^{-3}$ ( $-2 \times 10^{-3}$ , $-2 \times 10^{-4}$ ) $p=0.01$ | 0.07       | $-7 \times 10^{-4}$ ( $-1 \times 10^{-3}$ , $-2 \times 10^{-4}$ ) $p=0.01$ |  |  |
| <b>Amino acids</b>                            |                                                                            |                                                                            |            |                                                                            |  |  |

S6 Table. NFBC66 and NFBC86: offspring lipoproteins, lipids and metabolites absolute concentration differences per 1-SD higher parental BMI.

| Metabolites                       | NFBC86                                                                              |                                                                                       |            | NFBC66                                                                              |
|-----------------------------------|-------------------------------------------------------------------------------------|---------------------------------------------------------------------------------------|------------|-------------------------------------------------------------------------------------|
|                                   | mother                                                                              | father                                                                                | $P_{boot}$ | mother                                                                              |
| Alanine (mmol/l)                  | $-6 \times 10^{-4}$ ( $-3 \times 10^{-3}$ , $2 \times 10^{-3}$ ) $p=0.60$           | $-4 \times 10^{-4}$ ( $-3 \times 10^{-3}$ , $2 \times 10^{-3}$ ) $p=0.72$             | 0.90       | $1 \times 10^{-3}$ ( $-9 \times 10^{-4}$ , $4 \times 10^{-3}$ ) $p=0.21$            |
| Glutamine (mmol/l)                | $-6 \times 10^{-4}$ ( $-3 \times 10^{-3}$ , $2 \times 10^{-3}$ ) $p=0.63$           | $-2 \times 10^{-3}$ ( $-4 \times 10^{-3}$ , $6 \times 10^{-4}$ ) $p=0.14$             | 0.46       | $-3 \times 10^{-3}$ ( $-0.01$ , $2 \times 10^{-4}$ ) $p=0.07$                       |
| Histidine (mmol/l)                | $5 \times 10^{-5}$ ( $-3 \times 10^{-4}$ , $4 \times 10^{-4}$ ) $p=0.77$            | $2 \times 10^{-4}$ ( $-2 \times 10^{-4}$ , $6 \times 10^{-4}$ ) $p=0.29$              | 0.58       | $-3 \times 10^{-5}$ ( $-4 \times 10^{-4}$ , $4 \times 10^{-4}$ ) $p=0.90$           |
| <b>Branched-chain amino acids</b> |                                                                                     |                                                                                       |            |                                                                                     |
| Isoleucine (mmol/l)               | $5 \times 10^{-4}$ ( $-4 \times 10^{-6}$ , $9 \times 10^{-4}$ ) $p=0.05$            | $8 \times 10^{-4}$ ( $4 \times 10^{-4}$ , $1 \times 10^{-3}$ ) $p=3 \times 10^{-4}$   | 0.26       | $7 \times 10^{-4}$ ( $2 \times 10^{-4}$ , $1 \times 10^{-3}$ ) $p=2 \times 10^{-3}$ |
| Leucine (mmol/l)                  | $5 \times 10^{-4}$ ( $-3 \times 10^{-5}$ , $1 \times 10^{-3}$ ) $p=0.06$            | $1 \times 10^{-3}$ ( $6 \times 10^{-4}$ , $2 \times 10^{-3}$ ) $p=7 \times 10^{-5}$   | 0.13       | $1 \times 10^{-3}$ ( $5 \times 10^{-4}$ , $2 \times 10^{-3}$ ) $p=4 \times 10^{-4}$ |
| Valine (mmol/l)                   | $8 \times 10^{-4}$ ( $-5 \times 10^{-4}$ , $2 \times 10^{-3}$ ) $p=0.23$            | $2 \times 10^{-3}$ ( $9.7 \times 10^{-4}$ , $4 \times 10^{-3}$ ) $p=7 \times 10^{-4}$ | 0.11       | $2 \times 10^{-3}$ ( $5 \times 10^{-4}$ , $3 \times 10^{-3}$ ) $p=0.01$             |
| <b>Aromatic amino acids</b>       |                                                                                     |                                                                                       |            |                                                                                     |
| Phenylalanine (mmol/l)            | $7 \times 10^{-4}$ ( $3 \times 10^{-4}$ , $1 \times 10^{-3}$ ) $p=6 \times 10^{-4}$ | $5 \times 10^{-4}$ ( $9 \times 10^{-5}$ , $9 \times 10^{-4}$ ) $p=0.01$               | 0.49       | $1 \times 10^{-3}$ ( $7 \times 10^{-4}$ , $2 \times 10^{-3}$ ) $p=4 \times 10^{-7}$ |
| Tyrosine (mmol/l)                 | $1 \times 10^{-4}$ ( $-3 \times 10^{-4}$ , $6 \times 10^{-4}$ ) $p=0.54$            | $4 \times 10^{-4}$ ( $-1 \times 10^{-5}$ , $9 \times 10^{-4}$ ) $p=0.06$              | 0.33       | $5 \times 10^{-4}$ ( $1 \times 10^{-4}$ , $9 \times 10^{-4}$ ) $p=0.01$             |
| <b>Ketone bodies</b>              |                                                                                     |                                                                                       |            |                                                                                     |
| Acetate (mmol/l)                  | $9.6 \times 10^{-5}$ ( $-3 \times 10^{-4}$ , $5 \times 10^{-4}$ ) $p=0.60$          | $-4 \times 10^{-5}$ ( $-4 \times 10^{-4}$ , $3 \times 10^{-4}$ ) $p=0.84$             | 0.56       | $-4 \times 10^{-4}$ ( $-1 \times 10^{-3}$ , $3 \times 10^{-4}$ ) $p=0.29$           |
| Acetoacetate (mmol/l)             | $2 \times 10^{-3}$ ( $-1 \times 10^{-4}$ , $5 \times 10^{-3}$ ) $p=0.06$            | $6 \times 10^{-4}$ ( $-1 \times 10^{-3}$ , $2 \times 10^{-3}$ ) $p=0.46$              | 0.19       | $-2 \times 10^{-3}$ ( $-3 \times 10^{-3}$ , $-5 \times 10^{-4}$ ) $p=0.01$          |
| Beta-hydroxybutyrate (mmol/l)     | $2 \times 10^{-3}$ ( $-2 \times 10^{-3}$ , $0.01$ ) $p=0.35$                        | $1 \times 10^{-3}$ ( $-3 \times 10^{-3}$ , $0.01$ ) $p=0.55$                          | 0.77       | $-3 \times 10^{-3}$ ( $-0.01$ , $-6 \times 10^{-5}$ ) $p=0.05$                      |
| <b>Fluid balance</b>              |                                                                                     |                                                                                       |            |                                                                                     |
| Creatinine (mmol/l)               | $2 \times 10^{-4}$ ( $-2 \times 10^{-4}$ , $5 \times 10^{-4}$ ) $p=0.34$            | $4 \times 10^{-4}$ ( $4 \times 10^{-5}$ , $7 \times 10^{-4}$ ) $p=0.03$               | 0.36       | $6 \times 10^{-5}$ ( $-3 \times 10^{-4}$ , $5 \times 10^{-4}$ ) $p=0.75$            |
| Albumin (signal area)             | $2 \times 10^{-4}$ ( $-2 \times 10^{-4}$ , $7 \times 10^{-4}$ ) $p=0.34$            | $3 \times 10^{-5}$ ( $-4 \times 10^{-4}$ , $5 \times 10^{-4}$ ) $p=0.88$              | 0.53       | $-3 \times 10^{-4}$ ( $-8 \times 10^{-4}$ , $2 \times 10^{-4}$ ) $p=0.31$           |
| <b>Inflammation</b>               |                                                                                     |                                                                                       |            |                                                                                     |
| Glycoprotein acetyls (mmol/l)     | 0.01 ( $4 \times 10^{-3}$ , 0.02) $p=3 \times 10^{-3}$                              | 0.01 ( $3 \times 10^{-3}$ , 0.02) $p=0.01$                                            | 0.70       | 0.01 ( $4 \times 10^{-3}$ , 0.02) $p=4 \times 10^{-3}$                              |

Associations were adjusted for parental age, smoking, education, head of household social class, maternal parity, offspring's age at blood collection and sex.

S6 Table correspond to the SD-scaled metabolite concentration shown in S3 Fig.
